# Supplementary material for: Stage Transitions in Lucilia sericata and Phormia regina (Diptera: Calliphoridae) and Implications for Forensic Science
Source: MDPI journal article supplement (doi:10.3390/insects14040315), 2023-03-25
Supplement: s1 [file s1]

## Supplementary Materials S1

Development data for *Lucilia sericata* (from Excel).

| Transitions at 50% by Dose Analysis |  |      |                           |       |       |       |        |        |
|-------------------------------------|--|------|---------------------------|-------|-------|-------|--------|--------|
| Temp                                |  |      | Hours to Stage Transition |       |       |       |        |        |
| Mean                                |  | SE   | E-L1                      | E-L2  | E-L3f | E-L3m | E-P    | E-A    |
| 10.4                                |  | 0.51 | 155.0                     | 317.3 | 451.5 | 683.8 | 1380.2 | 3798.4 |
| 12.7                                |  | 0.18 | 32.3                      | 136.1 | 230.5 | 431.3 | 1970.6 | 2891.0 |
| 15.1                                |  | 0.14 | 51.7                      | 137.6 | 179.1 | 313.8 | 754.0  | 1708.5 |
| 17.5                                |  | 0.12 | 45.6                      | 85.4  | 136.6 | 237.2 | 326.4  | 760.8  |
| 20.1                                |  | 0.09 | 28.0                      | 57.9  | 92.1  | 189.3 | 217.0  | 553.4  |
| 22.5                                |  | 0.10 | 22.1                      | 45.7  | 77.5  | 141.1 | 202.4  | 424.6  |
| 25.0                                |  | 0.06 | 16.9                      | 38.4  | 62.3  | 111.3 | 167.8  | 370.2  |
| 27.5                                |  | 0.06 | 11.8                      | 30.9  | 46.5  | 124.3 | 157.6  | 344.5  |
| 30.0                                |  | 0.05 | 11.4                      | 24.6  | 41.6  | 86.7  | 139.3  | 297.2  |
| 32.5                                |  | 0.02 | 9.7                       | 19.2  | 35.6  | 84.5  | 156.8  | 308.4  |

| Temp |  |      | Hours in Stage |       |       |       |        |        |
|------|--|------|----------------|-------|-------|-------|--------|--------|
| Mean |  | SE   | Egg            | L1    | L2    | L3f   | L3m    | P      |
| 10.4 |  | 0.51 | 155.0          | 162.3 | 134.2 | 232.3 | 696.3  | 2418.3 |
| 12.7 |  | 0.18 | 32.3           | 103.7 | 94.4  | 200.8 | 1539.3 | 920.4  |
| 15.1 |  | 0.14 | 51.7           | 85.9  | 41.5  | 134.7 | 440.2  | 954.5  |
| 17.5 |  | 0.12 | 45.6           | 39.8  | 51.2  | 100.6 | 89.2   | 434.4  |
| 20.1 |  | 0.09 | 28.0           | 29.9  | 34.2  | 97.2  | 27.7   | 336.4  |
| 22.5 |  | 0.10 | 22.1           | 23.6  | 31.8  | 63.6  | 61.3   | 222.2  |
| 25.0 |  | 0.06 | 16.9           | 21.5  | 23.9  | 49.0  | 56.4   | 202.4  |
| 27.5 |  | 0.06 | 11.8           | 19.0  | 15.6  | 77.8  | 33.3   | 186.9  |
| 30.0 |  | 0.05 | 11.4           | 13.2  | 17.0  | 45.1  | 52.6   | 157.9  |
| 32.5 |  | 0.02 | 9.7            | 9.5   | 16.4  | 48.9  | 72.3   | 151.6  |

| Temp |  |      | Days to Stage Transition |      |       |       |      |       |
|------|--|------|--------------------------|------|-------|-------|------|-------|
| Mean |  | SE   | E-L1                     | E-L2 | E-L3f | E-L3m | E-P  | E-A   |
| 10.4 |  | 0.16 | 6.5                      | 13.2 | 18.8  | 28.5  | 57.5 | 158.3 |
| 12.7 |  | 0.13 | 1.3                      | 5.7  | 9.6   | 18.0  | 82.1 | 120.5 |
| 15.1 |  | 0.15 | 2.2                      | 5.7  | 7.5   | 13.1  | 31.4 | 71.2  |
| 17.5 |  | 0.09 | 1.9                      | 3.6  | 5.7   | 9.9   | 13.6 | 31.7  |
| 20.1 |  | 0.1  | 1.2                      | 2.4  | 3.8   | 7.9   | 9.0  | 23.1  |
| 22.5 |  | 0.90 | 0.9                      | 1.9  | 3.2   | 5.9   | 8.4  | 17.7  |
| 25.0 |  | 0.08 | 0.7                      | 1.6  | 2.6   | 4.6   | 7.0  | 15.4  |
| 27.5 |  | 0.07 | 0.5                      | 1.3  | 1.9   | 5.2   | 6.6  | 14.4  |
| 30.0 |  | 0.23 | 0.5                      | 1.0  | 1.7   | 3.6   | 5.8  | 12.4  |
| 32.5 |  | 0.07 | 0.4                      | 0.8  | 1.5   | 3.5   | 6.5  | 12.8  |

| Temp |      |  | Days in Stage |     |     |     |      |       |
|------|------|--|---------------|-----|-----|-----|------|-------|
| Mean | SE   |  | Egg           | L1  | L2  | L3f | L3m  | P     |
| 10.4 | 0.16 |  | 6.5           | 6.8 | 5.6 | 9.7 | 29.0 | 100.8 |
| 12.7 | 0.13 |  | 1.3           | 4.3 | 3.9 | 8.4 | 64.1 | 38.3  |
| 15.1 | 0.15 |  | 2.2           | 3.6 | 1.7 | 5.6 | 18.3 | 39.8  |
| 17.5 | 0.09 |  | 1.9           | 1.7 | 2.1 | 4.2 | 3.7  | 18.1  |
| 20.1 | 0.1  |  | 1.2           | 1.2 | 1.4 | 4.0 | 1.2  | 14.0  |
| 22.5 | 0.90 |  | 0.9           | 1.0 | 1.3 | 2.7 | 2.6  | 9.3   |
| 25.0 | 0.08 |  | 0.7           | 0.9 | 1.0 | 2.0 | 2.4  | 8.4   |
| 27.5 | 0.07 |  | 0.5           | 0.8 | 0.7 | 3.2 | 1.4  | 7.8   |
| 30.0 | 0.23 |  | 0.5           | 0.5 | 0.7 | 1.9 | 2.2  | 6.6   |
| 32.5 | 0.07 |  | 0.4           | 0.4 | 0.7 | 2.0 | 3.0  | 6.3   |

| Temp |      |  | 1/Days to Stage Transition |       |       |       |       |       |
|------|------|--|----------------------------|-------|-------|-------|-------|-------|
| Mean | SE   |  | E-L1                       | E-L2  | E-L3f | E-L3m | E-P   | E-A   |
| 10.4 | 0.51 |  | 0.155                      | 0.076 | 0.053 | 0.035 | 0.017 | 0.006 |
| 12.7 | 0.18 |  | 0.742                      | 0.176 | 0.104 | 0.056 | 0.012 | 0.008 |
| 15.1 | 0.14 |  | 0.465                      | 0.174 | 0.134 | 0.076 | 0.032 | 0.014 |
| 17.5 | 0.12 |  | 0.526                      | 0.281 | 0.176 | 0.101 | 0.074 | 0.032 |
| 20.1 | 0.09 |  | 0.857                      | 0.414 | 0.261 | 0.127 | 0.111 | 0.043 |
| 22.5 | 0.10 |  | 1.084                      | 0.525 | 0.310 | 0.170 | 0.119 | 0.057 |
| 25.0 | 0.06 |  | 1.418                      | 0.624 | 0.385 | 0.216 | 0.143 | 0.065 |
| 27.5 | 0.06 |  | 2.028                      | 0.778 | 0.516 | 0.193 | 0.152 | 0.070 |
| 30.0 | 0.05 |  | 2.098                      | 0.975 | 0.577 | 0.277 | 0.172 | 0.081 |
| 32.5 | 0.02 |  | 2.470                      | 1.250 | 0.675 | 0.284 | 0.153 | 0.078 |

| Temp |      |  | 1/Days in Stage |       |       |       |       |       |
|------|------|--|-----------------|-------|-------|-------|-------|-------|
| Mean | SE   |  | Egg             | L1    | L2    | L3f   | L3m   | P     |
| 10.4 | 0.51 |  | 0.155           | 0.148 | 0.179 | 0.103 | 0.034 | 0.010 |
| 12.7 | 0.18 |  | 0.742           | 0.231 | 0.254 | 0.120 | 0.016 | 0.026 |
| 15.1 | 0.14 |  | 0.465           | 0.279 | 0.578 | 0.178 | 0.055 | 0.025 |
| 17.5 | 0.12 |  | 0.526           | 0.603 | 0.469 | 0.239 | 0.269 | 0.055 |
| 20.1 | 0.09 |  | 0.857           | 0.802 | 0.702 | 0.247 | 0.866 | 0.071 |
| 22.5 | 0.10 |  | 1.084           | 1.017 | 0.755 | 0.377 | 0.392 | 0.108 |
| 25.0 | 0.06 |  | 1.418           | 1.115 | 1.006 | 0.489 | 0.425 | 0.119 |
| 27.5 | 0.06 |  | 2.028           | 1.261 | 1.535 | 0.308 | 0.721 | 0.128 |
| 30.0 | 0.05 |  | 2.098           | 1.823 | 1.415 | 0.532 | 0.456 | 0.152 |
| 32.5 | 0.02 |  | 2.470           | 2.533 | 1.465 | 0.491 | 0.332 | 0.158 |

|                        | Linear Regression Results (from Graph Pad Prism) |      |       |       |       |       |
|------------------------|--------------------------------------------------|------|-------|-------|-------|-------|
|                        | 1/Days to Stage Transition                       |      |       |       |       |       |
|                        | E-L1                                             | E-L2 | E-L3f | E-L3m | E-P   | E-A   |
| Dev Min (x-intercept): | 12.6                                             | 10.8 | 10.5  | 8.8   | 10.3  | 10.7  |
| ADD (1/slope):         | 8.2                                              | 21.3 | 35.2  | 82.5  | 107.5 | 230.2 |
| Range min:             | 15.0                                             | 15.0 | 15.0  | 15.0  | 17.5  | 17.5  |
| Range max:             | 30.0                                             | 30.0 | 30.0  | 30.0  | 30.0  | 30.0  |

|                        | 1/Days in Stage |      |      |      |      |       |
|------------------------|-----------------|------|------|------|------|-------|
|                        | Egg             | L1   | L2   | L3f  | L3m  | P     |
| Dev Min (x-intercept): | 9.5             | 10.9 | 9.3  | 6.6  | 11.5 | 10.4  |
| ADD (1/slope):         | 10.3            | 11.7 | 14.3 | 47.2 | 29.8 | 127.9 |
| Range min:             | 15.0            | 15.0 | 15.0 | 17.5 | 17.5 | 17.5  |
| Range max:             | 30.0            | 30.0 | 30.0 | 30.0 | 30.0 | 30.0  |

| Comparison of Transition vs. Stage Results |       |          |            |              |
|--------------------------------------------|-------|----------|------------|--------------|
|                                            | trans | by stage | diff (t-s) | % diff (d/t) |
| Egg-L1                                     | 8.2   | 9.5      | -1.3       | -15.2%       |
| L1-L2                                      | 21.3  | 20.4     | 1.0        | 4.5%         |
| L2-L3f                                     | 35.2  | 34.6     | 0.6        | 1.8%         |
| L3f-L3m                                    | 82.5  | 81.8     | 0.7        | 0.9%         |
| L3m-P                                      | 107.5 | 111.6    | -4.1       | -3.8%        |
| P-A                                        | 230.2 | 239.5    | -9.3       | -4.0%        |

| From Prism (Linear Regressions): missing values represent non-linearity |      |                         |       |       |       |        |        |
|-------------------------------------------------------------------------|------|-------------------------|-------|-------|-------|--------|--------|
| Temp                                                                    |      | Transition ADD by 1/Day |       |       |       |        |        |
| Mean                                                                    | SE   | E-L1                    | E-L2  | E-L3f | E-L3m | E-P    | E-A    |
| 10.4                                                                    | 0.51 |                         |       |       |       |        |        |
| 12.7                                                                    | 0.18 | 0.14                    | 10.74 | 21.46 | 70.59 |        |        |
| 15.1                                                                    | 0.14 | 5.33                    | 24.45 | 34.36 | 82.36 |        |        |
| 17.5                                                                    | 0.12 | 9.42                    | 24.00 | 40.31 | 86.74 | 97.81  | 218.17 |
| 20.1                                                                    | 0.09 | 8.75                    | 22.41 | 36.95 | 89.28 | 88.02  | 217.35 |
| 22.5                                                                    | 0.10 | 9.18                    | 22.39 | 39.05 | 81.06 | 102.89 | 210.33 |
| 25.0                                                                    | 0.06 | 8.75                    | 22.75 | 37.74 | 75.31 | 102.40 | 221.17 |
| 27.5                                                                    | 0.06 | 7.36                    | 21.51 | 33.07 | 97.17 | 112.78 | 242.08 |
| 30.0                                                                    | 0.05 | 8.31                    | 19.70 | 33.87 | 76.76 | 114.14 | 239.74 |
| 32.5                                                                    | 0.02 | 8.07                    | 17.36 | 32.69 | 83.58 |        |        |

| Temp |      | Stage ADD by 1/Days |      |      |      |      |       |
|------|------|---------------------|------|------|------|------|-------|
| Mean | SE   | Egg                 | L1   | L2   | L3f  | L3m  | P     |
| 10.4 | 0.51 |                     |      |      |      |      |       |
| 12.7 | 0.18 | 4.3                 | 7.8  | 13.2 | 50.8 |      |       |
| 15.1 | 0.14 | 12.0                | 14.9 | 9.9  | 47.4 |      |       |
| 17.5 | 0.12 | 15.3                | 11.0 | 17.5 | 45.8 | 22.3 | 129.8 |
| 20.1 | 0.09 | 12.4                | 11.5 | 15.3 | 54.5 |      | 136.2 |
| 22.5 | 0.10 | 12.1                | 11.5 | 17.5 | 42.2 | 28.1 | 112.7 |
| 25.0 | 0.06 | 10.9                | 12.6 | 15.6 | 37.5 | 31.6 | 123.4 |
| 27.5 | 0.06 | 8.9                 | 13.2 | 11.8 | 67.7 | 22.2 | 133.6 |
| 30.0 | 0.05 | 9.8                 | 10.5 | 14.6 | 44.0 | 40.5 | 129.3 |
| 32.5 | 0.02 | 9.3                 | 8.5  | 15.8 | 52.7 |      |       |

| Temp (mean)    | Transition ADD by 1/Day |      |       |       |       |       |
|----------------|-------------------------|------|-------|-------|-------|-------|
|                | E-L1                    | E-L2 | E-L3f | E-L3m | E-P   | E-A   |
| 10.4           |                         |      |       |       |       |       |
| 12.7           |                         |      |       |       |       |       |
| 15.1           | 5.3                     | 24.4 | 34.4  | 82.4  |       |       |
| 17.5           | 9.4                     | 24.0 | 40.3  | 86.7  | 97.8  | 218.2 |
| 20.1           | 8.7                     | 22.4 | 36.9  | 89.3  | 88.0  | 217.3 |
| 22.5           | 9.2                     | 22.4 | 39.0  | 81.1  | 102.9 | 210.3 |
| 25.0           | 8.8                     | 22.7 | 37.7  | 75.3  | 102.4 | 221.2 |
| 27.5           | 7.4                     | 21.5 | 33.1  | 97.2  | 112.8 | 242.1 |
| 30.0           | 8.3                     | 19.7 | 33.9  | 76.8  | 114.1 | 239.7 |
| 32.5           |                         |      |       |       |       |       |
| mean           | 8.2                     | 22.5 | 36.5  | 84.1  | 103.0 | 224.8 |
| SE             | 1.3                     | 1.5  | 2.6   | 7.1   | 8.9   | 11.9  |
| n              | 7                       | 7    | 7     | 7     | 6     | 6     |
| Regression ADD | 8                       | 21   | 35    | 83    | 108   | 230   |
| % deviation    | -0.8%                   | 5.4% | 3.5%  | 1.9%  | -4.2% | -2.3% |
| ADD Range min: | 15.0                    | 15.0 | 15.0  | 15.0  | 17.5  | 17.5  |
| ADD Range max: | 30.0                    | 30.0 | 30.0  | 30.0  | 30.0  | 30.0  |

| Temp (mean)    | Stage ADD by 1/Days |      |      |      |       |       |
|----------------|---------------------|------|------|------|-------|-------|
|                | Egg                 | L1   | L2   | L3f  | L3m   | P     |
| 10.4           |                     |      |      |      |       |       |
| 12.7           |                     |      |      |      |       |       |
| 15.1           | 12.0                | 14.9 | 9.9  |      |       |       |
| 17.5           | 15.3                | 11.0 | 17.5 | 45.8 | 22.3  | 129.8 |
| 20.1           | 12.4                | 11.5 | 15.3 | 54.5 |       | 136.2 |
| 22.5           | 12.1                | 11.5 | 17.5 | 42.2 | 28.1  | 112.7 |
| 25.0           | 10.9                | 12.6 | 15.6 | 37.5 | 31.6  | 123.4 |
| 27.5           | 8.9                 | 13.2 | 11.8 | 67.7 | 22.2  | 133.6 |
| 30.0           | 9.8                 | 10.5 | 14.6 | 44.0 | 40.5  | 129.3 |
| 32.5           |                     |      |      |      |       |       |
| mean           | 11.6                | 12.2 | 14.6 | 48.6 | 28.9  | 127.5 |
| SE             | 1.9                 | 1.4  | 2.6  | 9.9  | 6.8   | 7.7   |
| n              | 7                   | 7    | 7    | 6    | 5     | 6     |
| Regression ADD | 10                  | 12   | 14   | 47   | 30    | 128   |
| % deviation    | 13.3%               | 4.1% | 2.4% | 3.1% | -3.0% | -0.3% |
| ADD Range min: | 15.0                | 15.0 | 15.0 | 17.5 | 17.5  | 17.5  |
| ADD Range max: | 30.0                | 30.0 | 30.0 | 30.0 | 30.0  | 30    |

| Temp | % Time in Stage |        |        |        |        |        |
|------|-----------------|--------|--------|--------|--------|--------|
|      | Egg             | L1     | L2     | L3f    | L3m    | P      |
| 10.4 |                 |        |        |        |        |        |
| 12.7 | 1.1%            | 3.6%   | 3.3%   | 7.0%   | 53.8%  | 32.2%  |
| 15.1 | 3.1%            | 5.2%   | 2.5%   | 8.1%   | 26.6%  | 57.6%  |
| 17.5 | 6.4%            | 5.6%   | 7.2%   | 14.1%  | 12.5%  | 60.7%  |
| 20.1 | 5.3%            | 5.7%   | 6.5%   | 18.5%  | 5.3%   | 64.0%  |
| 22.5 | 5.5%            | 5.9%   | 7.9%   | 15.8%  | 15.2%  | 55.2%  |
| 25.0 | 4.8%            | 6.1%   | 6.8%   | 13.9%  | 16.0%  | 57.3%  |
| 27.5 | 3.6%            | 5.7%   | 4.7%   | 23.4%  | 10.0%  | 56.2%  |
| 30.0 | 4.0%            | 4.6%   | 5.9%   | 15.8%  | 18.4%  | 55.3%  |
| 32.5 | 3.3%            | 3.2%   | 5.5%   | 16.4%  | 24.2%  | 50.8%  |
| Mean | 4.12%           | 5.06%  | 5.58%  | 14.77% | 20.22% | 54.37% |
| SE   | 1.49%           | 0.98%  | 1.69%  | 4.69%  | 13.42% | 8.58%  |
| CV   | 36.14%          | 19.37% | 30.23% | 31.76% | 66.38% | 15.78% |

| Temp |      | % Total Development |        |        |        |        |        |
|------|------|---------------------|--------|--------|--------|--------|--------|
| Mean | SE   | E-L1                | E-L2   | E-L3f  | E-L3m  | E-P    | E-A    |
| 10.4 | 0.51 |                     |        |        |        |        |        |
| 12.7 | 0.18 | 0.57%               | 2.40%  | 4.07%  | 7.62%  | 34.82% | 51.08% |
| 15.1 | 0.14 | 1.67%               | 4.45%  | 5.79%  | 10.15% | 24.38% | 55.24% |
| 17.5 | 0.12 | 2.95%               | 5.52%  | 8.83%  | 15.34% | 21.11% | 49.20% |
| 20.1 | 0.09 | 2.52%               | 5.22%  | 8.30%  | 17.06% | 19.55% | 49.87% |
| 22.5 | 0.10 | 2.48%               | 5.13%  | 8.70%  | 15.83% | 22.71% | 47.63% |
| 25.0 | 0.06 | 2.26%               | 5.13%  | 8.31%  | 14.85% | 22.37% | 49.36% |
| 27.5 | 0.06 | 1.68%               | 4.39%  | 6.61%  | 17.66% | 22.39% | 48.95% |
| 30.0 | 0.05 | 1.94%               | 4.18%  | 7.05%  | 14.71% | 23.63% | 50.43% |
| 32.5 | 0.02 | 1.61%               | 3.18%  | 5.89%  | 13.98% | 25.94% | 51.02% |
| Mean |      | 1.97%               | 4.40%  | 7.06%  | 14.13% | 24.10% | 50.31% |
| SE   |      | 0.66%               | 0.97%  | 1.53%  | 3.06%  | 4.16%  | 2.02%  |
| CV   |      | 33.39%              | 22.13% | 21.65% | 21.69% | 17.28% | 4.02%  |

| Temp |      |  | ADD Temp * Days to Stage Transition |      |       |       |      |      |
|------|------|--|-------------------------------------|------|-------|-------|------|------|
| Mean | SE   |  | E-L1                                | E-L2 | E-L3f | E-L3m | E-P  | E-A  |
| 10.4 | 0.51 |  | 66.9                                |      |       |       |      |      |
| 12.7 | 0.18 |  | 14.0                                | 1.0  | 1.8   | 3.3   | 15.1 | 22.1 |
| 15.1 | 0.14 |  | 22.3                                | 0.8  | 1.0   | 1.8   | 4.3  | 9.7  |
| 17.5 | 0.12 |  | 19.7                                | 0.4  | 0.7   | 1.2   | 1.6  | 3.8  |
| 20.1 | 0.09 |  | 12.1                                | 0.2  | 0.3   | 0.7   | 0.8  | 2.1  |
| 22.5 | 0.10 |  | 9.6                                 | 0.2  | 0.3   | 0.6   | 0.8  | 1.7  |
| 25.0 | 0.06 |  | 7.3                                 | 0.1  | 0.2   | 0.3   | 0.5  | 1.0  |
| 27.5 | 0.06 |  | 5.1                                 | 0.1  | 0.1   | 0.3   | 0.4  | 0.8  |
| 30.0 | 0.05 |  | 4.9                                 | 0.1  | 0.1   | 0.2   | 0.3  | 0.7  |
| 32.5 | 0.02 |  | 4.2                                 | 0.0  | 0.0   | 0.1   | 0.1  | 0.2  |

| Temp |      |  | ADD Temp * Days in Stage |     |     |     |      |     |
|------|------|--|--------------------------|-----|-----|-----|------|-----|
| Mean | SE   |  | Egg                      | L1  | L2  | L3f | L3m  | P   |
| 10.4 | 0.51 |  |                          |     |     |     |      |     |
| 12.7 | 0.18 |  | 0.2                      | 0.8 | 0.7 | 1.5 | 11.8 | 7.0 |
| 15.1 | 0.14 |  | 0.3                      | 0.5 | 0.2 | 0.8 | 2.5  | 5.4 |
| 17.5 | 0.12 |  | 0.2                      | 0.2 | 0.3 | 0.5 | 0.4  | 2.2 |
| 20.1 | 0.09 |  | 0.1                      | 0.1 | 0.1 | 0.4 | 0.1  | 1.3 |
| 22.5 | 0.10 |  | 0.1                      | 0.1 | 0.1 | 0.3 | 0.2  | 0.9 |
| 25.0 | 0.06 |  | 0.0                      | 0.1 | 0.1 | 0.1 | 0.2  | 0.5 |
| 27.5 | 0.06 |  | 0.0                      | 0.0 | 0.0 | 0.2 | 0.1  | 0.4 |
| 30.0 | 0.05 |  | 0.0                      | 0.0 | 0.0 | 0.1 | 0.1  | 0.4 |
| 32.5 | 0.02 |  | 0.0                      | 0.0 | 0.0 | 0.0 | 0.0  | 0.1 |

For Deming Regressions

| Temp |      |  | Temp * Days to Stage Transition |      |       |       |      |      |  |
|------|------|--|---------------------------------|------|-------|-------|------|------|--|
| Mean | SE   |  | E-L1                            | E-L2 | E-L3f | E-L3m | E-P  | E-A  |  |
| 10.4 | 0.51 |  | 3.3                             | 6.8  | 9.7   | 14.6  | 29.5 | 81.2 |  |
| 12.7 | 0.18 |  | 0.2                             | 1.0  | 1.8   | 3.3   | 15.1 | 22.1 |  |
| 15.1 | 0.14 |  | 0.3                             | 0.8  | 1.0   | 1.8   | 4.3  | 9.7  |  |
| 17.5 | 0.12 |  | 0.2                             | 0.4  | 0.7   | 1.2   | 1.6  | 3.8  |  |
| 20.1 | 0.09 |  | 0.1                             | 0.2  | 0.3   | 0.7   | 0.8  | 2.1  |  |
| 22.5 | 0.10 |  | 0.1                             | 0.2  | 0.3   | 0.6   | 0.8  | 1.7  |  |
| 25.0 | 0.06 |  | 0.0                             | 0.1  | 0.2   | 0.3   | 0.5  | 1.0  |  |
| 27.5 | 0.06 |  | 0.0                             | 0.1  | 0.1   | 0.3   | 0.4  | 0.8  |  |
| 30.0 | 0.05 |  | 0.0                             | 0.1  | 0.1   | 0.2   | 0.3  | 0.7  |  |
| 32.5 | 0.02 |  | 0.0                             | 0.0  | 0.0   | 0.1   | 0.1  | 0.2  |  |

| Temp |      |  | Temp * Days in Stage |     |     |     |      |      |
|------|------|--|----------------------|-----|-----|-----|------|------|
| Mean | SE   |  | Egg                  | L1  | L2  | L3f | L3m  | P    |
| 10.4 | 0.51 |  | 3.3                  | 3.5 | 2.9 | 5.0 | 14.9 | 51.7 |
| 12.7 | 0.18 |  | 0.2                  | 0.8 | 0.7 | 1.5 | 11.8 | 7.0  |
| 15.1 | 0.14 |  | 0.3                  | 0.5 | 0.2 | 0.8 | 2.5  | 5.4  |
| 17.5 | 0.12 |  | 0.2                  | 0.2 | 0.3 | 0.5 | 0.4  | 2.2  |
| 20.1 | 0.09 |  | 0.1                  | 0.1 | 0.1 | 0.4 | 0.1  | 1.3  |
| 22.5 | 0.10 |  | 0.1                  | 0.1 | 0.1 | 0.3 | 0.2  | 0.9  |
| 25.0 | 0.06 |  | 0.0                  | 0.1 | 0.1 | 0.1 | 0.2  | 0.5  |
| 27.5 | 0.06 |  | 0.0                  | 0.0 | 0.0 | 0.2 | 0.1  | 0.4  |
| 30.0 | 0.05 |  | 0.0                  | 0.0 | 0.0 | 0.1 | 0.1  | 0.4  |
| 32.5 | 0.02 |  | 0.0                  | 0.0 | 0.0 | 0.0 | 0.0  | 0.1  |

Data for Prism polynomial fit for egg development

| Temp | Egg   |
|------|-------|
| 10.4 | 0.155 |
| 12.7 | 0.742 |
| 15.1 | 0.465 |
| 17.5 | 0.526 |
| 20.1 | 0.857 |
| 22.5 | 1.084 |
| 25.0 | 1.418 |
| 27.5 | 2.028 |
| 30.0 | 2.098 |
| 32.5 | 1.743 |



## Supplementary Materials S2

Datasets and statistical analysis summary of *Lucilia sericata* nonlinear regressions for percent in stage by temperature. Regression equations are :

Gaussian equation (a standard normal curve):

$$y = a \exp \left[ -\frac{1}{2} \left( \frac{x-b}{c} \right)^2 \right]$$

Modified Gaussian equation (a form of Gaussian curve with a plateau at 100%):

$$y = a \exp \left[ -\frac{1}{2} \left( \frac{|x-b|}{c} \right)^d \right]$$

Cumulative Gaussian equation (a form of the Gaussian curve used for adults, to model a sigmoidal increase to a plateau):

$$y = \frac{a}{2} \left[ 1 + \operatorname{erf} \left( \frac{x-b}{\sqrt{2}c} \right) \right]$$

Reversed cumulative Gaussian equation (a form of the cumulative Gaussian equation used for eggs, to model a sigmoidal decrease from a plateau):

$$y = \frac{a}{2} \left[ 1 - \operatorname{erf} \left( \frac{x-b}{\sqrt{2}c} \right) \right]$$

where x = development time (hours) and y = percent in stage. Where “interrupted” is indicated on a regression, data were insufficient to fit a curve (typically this means we obtained too few points in measuring portions of the transition curve). Where “ambiguous” is indicated on a regression, the program could not reach a final solution by iterative (numerical) methods. The analysis is from GraphPad Prism 6.0 which uses the Marquardt and Levenberg approach for non-linear regression.

*L. sericata* 10.0° C.

[illegible]

| L. sericata 12.5 °C       |          |          |          |          |          |      |                           |             |              |              |             |              |              |              |              |              |              |              |                          |              |              |                              |  |  |
|---------------------------|----------|----------|----------|----------|----------|------|---------------------------|-------------|--------------|--------------|-------------|--------------|--------------|--------------|--------------|--------------|--------------|--------------|--------------------------|--------------|--------------|------------------------------|--|--|
| Dataset                   |          |          |          |          |          |      |                           |             |              |              |             |              |              |              |              |              |              |              |                          |              |              |                              |  |  |
| Time                      | egg      |          |          | L1       |          |      | L2                        |             |              | L3f          |             |              | L3m          |              |              | P            |              |              | A                        |              |              |                              |  |  |
|                           | Mean     | SE       |          | Mean     | SE       |      | Mean                      | SE          |              | Mean         | SE          |              | Mean         | SE           |              | Mean         | SE           |              | Mean                     | SE           |              |                              |  |  |
| 0.0                       | 100      |          | 0        | 0        | 0        | 0    | 0                         | 0           | 0            | 0            | 0           | 0            | 0            | 0            | 0            | 0            | 0            | 0            | 0                        | 0            | 0            |                              |  |  |
| 11.0                      | 100      |          | 0        | 0        | 0        | 0    | 0                         | 0           | 0            | 0            | 0           | 0            | 0            | 0            | 0            | 0            | 0            | 0            | 0                        | 0            | 0            |                              |  |  |
| 46.2                      | 22.1     | 22.3     |          |          | 77.9     |      | 22.3                      |             | 0            |              | 0           |              | 0            |              | 0            |              | 0            |              | 0                        |              | 0            |                              |  |  |
| 81.1                      | 22.6     | 10.6     | 10.6     |          | 77.4     |      | 10.6                      |             | 0            |              | 0           |              | 0            |              | 0            |              | 0            |              | 0                        |              | 0            |                              |  |  |
| 116.2                     | 16.4     | 8.2      | 46.4     | 35.8     | 37.2     |      | 37.2                      |             | 0            |              | 0           |              | 0            |              | 0            |              | 0            |              | 0                        |              | 0            |                              |  |  |
| 151.1                     | 29.2     | 29.2     | 2.1      | 3.6      | 68.8     | 27.9 | 0                         |             | 0            |              | 0           |              | 0            |              | 0            |              | 0            |              | 0                        |              | 0            |                              |  |  |
| 207.1                     | 207.1    | 0        | 0        | 2.3      | 3.9      | 72.7 | 25                        | 43.3        | 0            |              | 0           |              | 0            |              | 0            |              | 0            |              | 0                        |              | 0            |                              |  |  |
| 263.1                     | 0        | 0        | 0        | 0        | 12.7     | 15.9 | 0                         |             | 0            |              | 0           |              | 0            |              | 0            |              | 0            |              | 0                        |              | 0            |                              |  |  |
| 319.1                     | 0        | 0        | 0        | 0        | 27.5     | 42.1 | 0                         |             | 0            |              | 0           |              | 0            |              | 0            |              | 0            |              | 0                        |              | 0            |                              |  |  |
| 375.1                     | 0        | 0        | 0        | 0        | 6.3      | 10.8 | 0                         |             | 0            |              | 0           |              | 0            |              | 0            |              | 0            |              | 0                        |              | 0            |                              |  |  |
| 431.1                     | 0        | 0        | 0        | 0        | 43.1     | 0    | 0                         |             | 0            |              | 0           |              | 0            |              | 0            |              | 0            |              | 0                        |              | 0            |                              |  |  |
| 510.1                     | 0        | 0        | 0        | 0        | 510.1    | 0    | 0                         |             | 0            |              | 0           |              | 0            |              | 0            |              | 0            |              | 0                        |              | 0            |                              |  |  |
| 589.0                     | 0        | 0        | 0        | 0        | 668.1    | 0    | 0                         |             | 0            |              | 0           |              | 0            |              | 0            |              | 0            |              | 0                        |              | 0            |                              |  |  |
| 747.1                     | 0        | 0        | 0        | 0        | 747.1    | 0    | 0                         |             | 0            |              | 0           |              | 0            |              | 0            |              | 0            |              | 0                        |              | 0            |                              |  |  |
| 826.1                     | 0        | 0        | 0        | 0        | 0        |      | 0                         |             | 0            |              | 0           |              | 0            |              | 0            |              | 0            |              | 0                        |              | 0            |                              |  |  |
| 965.1                     | 0        | 0        | 0        | 0        | 965.1    | 0    | 0                         |             | 0            |              | 0           |              | 0            |              | 0            |              | 0            |              | 0                        |              | 0            |                              |  |  |
| 1104.0                    | 0        | 0        | 0        | 0        | 0        |      | 0                         |             | 0            |              | 0           |              | 0            |              | 0            |              | 0            |              | 0                        |              | 0            |                              |  |  |
| 1243.0                    | 0        | 0        | 0        | 0        | 1243.0   | 0    | 0                         |             | 0            |              | 0           |              | 0            |              | 0            |              | 0            |              | 0                        |              | 0            |                              |  |  |
| 1382.0                    | 0        | 0        | 0        | 0        | 0        |      | 0                         |             | 0            |              | 0           |              | 0            |              | 0            |              | 0            |              | 0                        |              | 0            |                              |  |  |
| 1521.0                    | 0        | 0        | 0        | 0        | 1521.0   | 0    | 0                         |             | 0            |              | 0           |              | 0            |              | 0            |              | 0            |              | 0                        |              | 0            |                              |  |  |
| 1856.1                    | 0        | 0        | 0        | 0        | 1856.1   | 0    | 0                         |             | 0            |              | 0           |              | 0            |              | 0            |              | 0            |              | 0                        |              | 0            |                              |  |  |
| 2191.1                    | 0        | 0        | 0        | 0        | 0        |      | 0                         |             | 0            |              | 0           |              | 0            |              | 0            |              | 0            |              | 0                        |              | 0            |                              |  |  |
| 2526.0                    | 0        | 0        | 0        | 0        | 0        |      | 0                         |             | 0            |              | 0           |              | 0            |              | 0            |              | 0            |              | 0                        |              | 0            |                              |  |  |
| 2861.0                    | 0        | 0        | 0        | 0        | 2861.0   | 0    | 0                         |             | 0            |              | 0           |              | 0            |              | 0            |              | 0            |              | 0                        |              | 0            |                              |  |  |
| 3196.0                    | 0        | 0        | 0        | 0        | 3196.0   | 0    | 0                         |             | 0            |              | 0           |              | 0            |              | 0            |              | 0            |              | 0                        |              | 0            |                              |  |  |
| 3196.0                    | 0        | 0        | 0        | 0        | 3196.0   | 0    | 0                         |             | 0            |              | 0           |              | 0            |              | 0            |              | 0            |              | 0                        |              | 0            |                              |  |  |
| 3196.0                    | 0        | 0        | 0        | 0        | 3196.0   | 0    | 0                         |             | 0            |              | 0           |              | 0            |              | 0            |              | 0            |              | 0                        |              | 0            |                              |  |  |
| 3196.0                    | 0        | 0        | 0        | 0        | 3196.0   | 0    | 0                         |             | 0            |              | 0           |              | 0            |              | 0            |              | 0            |              | 0                        |              | 0            |                              |  |  |
|                           |          |          |          |          |          |      |                           |             |              |              |             |              |              |              |              |              |              |              |                          |              |              |                              |  |  |
| Amplitude                 | 90.67    | 86.28    | 95.07    | 109.6    | 79.6     | a    | Best-fit values           |             |              | L2           |             |              | L3f          |              |              | L3m          |              |              | Cumulative Gaussian      |              |              | Reversed Cumulative Gaussian |  |  |
|                           | Mean     | SE       | Mean     | SE       | Mean     | SE   | Mean                      | SE          | Mean         | SE           | Mean        | SE           | Mean         | SE           | Mean         | SE           | Mean         | SE           | Mean                     | SE           | Mean         | SE                           |  |  |
| Mean                      | 72.97    | 179.8    | 333.8    | 1090     | 2335     | b    | ~ 66.09                   | ~ 77.65     | ~ 72.70      | ~ 83.80      | ~ 92.52     | ~ 1145       | ~ 1145       | ~ 1145       | ~ 1145       | ~ 1145       | ~ 1145       | ~ 1145       | ~ 1145                   | ~ 1145       | ~ 1145       |                              |  |  |
| SD                        | 32.45    | 45.25    | 84       | 475.9    | 384.3    | c    | ~ 50.07                   | ~ 1.000     | ~ 1.000      | ~ 1.000      | ~ 712.6     | ~ 712.6      | ~ 712.6      | ~ 712.6      | ~ 712.6      | ~ 712.6      | ~ 712.6      | ~ 712.6      | ~ 712.6                  | ~ 712.6      | ~ 712.6      |                              |  |  |
| Std. Error                |          |          |          |          |          | d    | ~ 42.12                   | Std. Error  |              |              |             |              |              |              |              |              |              |              |                          |              |              |                              |  |  |
| Amplitude                 | 4.541    | 5.954    | 4.958    | 10.14    | 5.412    | a    | 95% Confidence Intervals  |             |              | L2           |             |              | L3f          |              |              | L3m          |              |              | 95% Confidence Intervals |              |              | 95% Confidence Intervals     |  |  |
| Mean                      | 1.879    | 3.078    | 5.201    | 57       | 30.16    | a    | ~ 3.052e+014              | ~ 0.4265    | ~ 5.021e+012 | ~ 1.992e+017 | 2.446       | ~ 2.108e+006             | ~ 2.108e+006 | ~ 2.108e+006 |                              |  |  |
| SD                        | 1.78     | 3.431    | 5.317    | 53.18    | 24.63    | b    | ~ 3.052e+014              | ~ 0.4265    | ~ 5.021e+012 | ~ 1.992e+017 | 2.446       | ~ 2.108e+006             | ~ 2.108e+006 | ~ 2.108e+006 |                              |  |  |
| Std. Error                |          |          |          |          |          | c    | ~ 3.052e+014              | ~ 0.4265    | ~ 5.021e+012 | ~ 1.992e+017 | 2.446       | ~ 2.108e+006             | ~ 2.108e+006 | ~ 2.108e+006 |                              |  |  |
| Amplitude                 | 81.37    | 99.37    | 74.08    | 96.47    | 84.92    | d    | ~ 3.052e+014              | ~ 0.4265    | ~ 5.021e+012 | ~ 1.992e+017 | 2.446       | ~ 2.108e+006             | ~ 2.108e+006 | ~ 2.108e+006 |                              |  |  |
| Mean                      | 69.13    | 76.82    | 173.5    | 186.1    | 323.2    | a    | ~ 3.052e+014              | ~ 0.4265    | ~ 5.021e+012 | ~ 1.992e+017 | 2.446       | ~ 2.108e+006             | ~ 2.108e+006 | ~ 2.108e+006 |                              |  |  |
| SD                        | 28.81    | 36.10    | 38.22    | 52.27    | 73.11    | b    | ~ 3.052e+014              | ~ 0.4265    | ~ 5.021e+012 | ~ 1.992e+017 | 2.446       | ~ 2.108e+006             | ~ 2.108e+006 | ~ 2.108e+006 |                              |  |  |
| Std. Error                |          |          |          |          |          | c    | ~ 3.052e+014              | ~ 0.4265    | ~ 5.021e+012 | ~ 1.992e+017 | 2.446       | ~ 2.108e+006             | ~ 2.108e+006 | ~ 2.108e+006 |                              |  |  |
| Goodness of Fit           |          |          |          |          |          | d    | ~ 3.052e+014              | ~ 0.4265    | ~ 5.021e+012 | ~ 1.992e+017 | 2.446       | ~ 2.108e+006             | ~ 2.108e+006 | ~ 2.108e+006 |                              |  |  |
| df                        | 28       | 28       | 28       | 24       | 28       | a    | 76.77                     | 76.77       | 76.77        | 76.77        | 76.77       | 76.77        | 76.77        | 76.77        | 76.77        | 76.77        | 76.77        | 76.77        | 76.77                    | 76.77        | 76.77        |                              |  |  |
| R square                  | 0.9463   | 0.9199   | 0.9438   | 0.7831   | 0.9599   | b    | (Very wide)               | (Very wide) | (Very wide)  | (Very wide)  | (Very wide) | (Very wide)  | (Very wide)  | (Very wide)  | (Very wide)  | (Very wide)  | (Very wide)  | (Very wide)  | (Very wide)              | (Very wide)  | (Very wide)  |                              |  |  |
| Absolute SS               | 651.2    | 859.3    | 1207     | 10971    | 1244     | c    | (Very wide)               | (Very wide) | (Very wide)  | (Very wide)  | (Very wide) | (Very wide)  | (Very wide)  | (Very wide)  | (Very wide)  | (Very wide)  | (Very wide)  | (Very wide)  | (Very wide)              | (Very wide)  | (Very wide)  |                              |  |  |
| Sy.x                      | 4.822    | 5.54     | 6.585    | 21.38    | 6.667    | d    | (Very wide)               | (Very wide) | (Very wide)  | (Very wide)  | (Very wide) | (Very wide)  | (Very wide)  | (Very wide)  | (Very wide)  | (Very wide)  | (Very wide)  | (Very wide)  | (Very wide)              | (Very wide)  | (Very wide)  |                              |  |  |
| SD                        | SD > 0.0 | df   | R square                  | 0.9992      | 0.3403       | 0.2453       | 0.9755      | 0.9992       | 0.3403       | 0.2453       | 0.9755       | 0.9992       | 0.3403       | 0.2453       | 0.9755                   | 0.9992       | 0.3403       |                              |  |  |
| Number of points Analyzed | 31       | 31       | 31       | 27       | 31       | a    | Absolute SS               | 9.825       | 7075         | 16217        | 1238        | 9.825        | 7075         | 16217        | 1238         | 9.825        | 7075         | 16217        | 1238                     | 9.825        | 7075         |                              |  |  |
|                           |          |          |          |          |          | b    | Sy.x                      | 0.6032      | 16.19        | 24.51        | 7.339       | 0.6032       | 16.19        | 24.51        | 7.339        | 0.6032       | 16.19        | 24.51        | 7.339                    | 0.6032       | 16.19        |                              |  |  |
|                           |          |          |          |          |          | c    | Constraints               | c > 0.0     | c > 0.0      | c > 0.0      | c > 0.0     | c > 0.0      | c > 0.0      | c > 0.0      | c > 0.0      | c > 0.0      | c > 0.0      | c > 0.0      | c > 0.0                  | c > 0.0      | c > 0.0      |                              |  |  |
|                           |          |          |          |          |          | d    |                           | d > 1.000   | d > 1.000    | d > 1.000    | d > 1.000   | d > 1.000    | d > 1.000    | d > 1.000    | d > 1.000    | d > 1.000    | d > 1.000    | d > 1.000    | d > 1.000                | d > 1.000    | d > 1.000    |                              |  |  |
|                           |          |          |          |          |          |      | Number of points Analyzed | 31          | 31           | 31           | 27          | 31           | 31           | 31           | 27           | 31           | 31           | 31           | 27                       | 31           | 31           |                              |  |  |
|                           |          |          |          |          |          |      |                           |             |              |              |             |              |              |              |              |              |              |              |                          |              |              |                              |  |  |
|                           |          |          |          |          |          |      |                           |             |              |              |             |              |              |              |              |              |              |              |                          |              |              |                              |  |  |
|                           |          |          |          |          |          |      |                           |             |              |              |             |              |              |              |              |              |              |              |                          |              |              |                              |  |  |
|                           |          |          |          |          |          |      |                           |             |              |              |             |              |              |              |              |              |              |              |                          |              |              |                              |  |  |
|                           |          |          |          |          |          |      |                           |             |              |              |             |              |              |              |              |              |              |              |                          |              |              |                              |  |  |
|                           |          |          |          |          |          |      |                           |             |              |              |             |              |              |              |              |              |              |              |                          |              |              |                              |  |  |
|                           |          |          |          |          |          |      |                           |             |              |              |             |              |              |              |              |              |              |              |                          |              |              |                              |  |  |
|                           |          |          |          |          |          |      |                           |             |              |              |             |              |              |              |              |              |              |              |                          |              |              |                              |  |  |
|                           |          |          |          |          |          |      |                           |             |              |              |             |              |              |              |              |              |              |              |                          |              |              |                              |  |  |
|                           |          |          |          |          |          |      |                           |             |              |              |             |              |              |              |              |              |              |              |                          |              |              |                              |  |  |
|                           |          |          |          |          |          |      |                           |             |              |              |             |              |              |              |              |              |              |              |                          |              |              |                              |  |  |
|                           |          |          |          |          |          |      |                           |             |              |              |             |              |              |              |              |              |              |              |                          |              |              |                              |  |  |
|                           |          |          |          |          |          |      |                           |             |              |              |             |              |              |              |              |              |              |              |                          |              |              |                              |  |  |
|                           |          |          |          |          |          |      |                           |             |              |              |             |              |              |              |              |              |              |              |                          |              |              |                              |  |  |
|                           |          |          |          |          |          |      |                           |             |              |              |             |              |              |              |              |              |              |              |                          |              |              |                              |  |  |
|                           |          |          |          |          |          |      |                           |             |              |              |             |              |              |              |              |              |              |              |                          |              |              |                              |  |  |
|                           |          |          |          |          |          |      |                           |             |              |              |             |              |              |              |              |              |              |              |                          |              |              |                              |  |  |
|                           |          |          |          |          |          |      |                           |             |              |              |             |              |              |              |              |              |              |              |                          |              |              |                              |  |  |
|                           |          |          |          |          |          |      |                           |             |              |              |             |              |              |              |              |              |              |              |                          |              |              |                              |  |  |
|                           |          |          |          |          |          |      |                           |             |              |              |             |              |              |              |              |              |              |              |                          |              |              |                              |  |  |
|                           |          |          |          |          |          |      |                           |             |              |              |             |              |              |              |              |              |              |              |                          |              |              |                              |  |  |
|                           |          |          |          |          |          |      |                           |             |              |              |             |              |              |              |              |              |              |              |                          |              |              |                              |  |  |
|                           |          |          |          |          |          |      |                           |             |              |              |             |              |              |              |              |              |              |              |                          |              |              |                              |  |  |
|                           |          |          |          |          |          |      |                           |             |              |              |             |              |              |              |              |              |              |              |                          |              |              |                              |  |  |
|                           |          |          |          |          |          |      |                           |             |              |              |             |              |              |              |              |              |              |              |                          |              |              |                              |  |  |
|                           |          |          |          |          |          |      |                           |             |              |              |             |              |              |              |              |              |              |              |                          |              |              |                              |  |  |
|                           |          |          |          |          |          |      |                           |             |              |              |             |              |              |              |              |              |              |              |                          |              |              |                              |  |  |
|                           |          |          |          |          |          |      |                           |             |              |              |             |              |              |              |              |              |              |              |                          |              |              |                              |  |  |
|                           |          |          |          |          |          |      |                           |             |              |              |             |              |              |              |              |              |              |              |                          |              |              |                              |  |  |
|                           |          |          |          |          |          |      |                           |             |              |              |             |              |              |              |              |              |              |              |                          |              |              |                              |  |  |
|                           |          |          |          |          |          |      |                           |             |              |              |             |              |              |              |              |              |              |              |                          |              |              |                              |  |  |
|                           |          |          |          |          |          |      |                           |             |              |              |             |              |              |              |              |              |              |              |                          |              |              |                              |  |  |
|                           |          |          |          |          |          |      |                           |             |              |              |             |              |              |              |              |              |              |              |                          |              |              |                              |  |  |
|                           |          |          |          |          |          |      |                           |             |              |              |             |              |              |              |              |              |              |              |                          |              |              |                              |  |  |
|                           |          |          |          |          |          |      |                           |             |              |              |             |              |              |              |              |              |              |              |                          |              |              |                              |  |  |

*L. sericata* 15.0° C.

| <i>L. sericata</i> 15.0° C |                |                |                |                |                     |      |                  |                  |                  |                  |                      |                          |                          |                      |                              |    |
|----------------------------|----------------|----------------|----------------|----------------|---------------------|------|------------------|------------------|------------------|------------------|----------------------|--------------------------|--------------------------|----------------------|------------------------------|----|
| Dataset                    |                |                |                |                |                     |      |                  |                  |                  |                  |                      |                          |                          |                      |                              |    |
| Time                       | egg            | L1             | L2             | L3f            | L3m                 | P    | A                | SE               | Mean             | SE               | Mean                 | SE                       | Mean                     | SE                   | Mean                         | SE |
| 0.0                        | 100            | 0              | 0              | 0              | 0                   | 0    | 0                | 0                | 0                | 0                | 0                    | 0                        | 0                        | 0                    | 0                            | 0  |
| 17.2                       | 100            | 0              | 0              | 0              | 0                   | 0    | 0                | 0                | 0                | 0                | 0                    | 0                        | 0                        | 0                    | 0                            | 0  |
| 34.2                       | 100            | 0              | 0              | 0              | 0                   | 0    | 0                | 0                | 0                | 0                | 0                    | 0                        | 0                        | 0                    | 0                            | 0  |
| 51.2                       | 51.8           | 19.3           | 48.2           | 19.3           | 0                   | 0    | 0                | 0                | 0                | 0                | 0                    | 0                        | 0                        | 0                    | 0                            | 0  |
| 68.2                       | 6.8            | 11.8           | 93.2           | 11.8           | 0                   | 0    | 0                | 0                | 0                | 0                | 0                    | 0                        | 0                        | 0                    | 0                            | 0  |
| 97.3                       | 0              | 0              | 100            | 0              | 0                   | 0    | 0                | 0                | 0                | 0                | 0                    | 0                        | 0                        | 0                    | 0                            | 0  |
| 113.2                      | 0              | 0              | 100            | 0              | 0                   | 0    | 0                | 0                | 0                | 0                | 0                    | 0                        | 0                        | 0                    | 0                            | 0  |
| 141.1                      | 0              | 0              | 4.2            | 7.2            | 95.8                | 0    | 0                | 0                | 0                | 0                | 0                    | 0                        | 0                        | 0                    | 0                            | 0  |
| 169.1                      | 0              | 0              | 72.9           | 42.2           | 27.1                | 42.2 | 0                | 0                | 0                | 0                | 0                    | 0                        | 0                        | 0                    | 0                            | 0  |
| 197.1                      | 0              | 0              | 16.2           | 4.6            | 83.8                | 4.6  | 0                | 0                | 0                | 0                | 0                    | 0                        | 0                        | 0                    | 0                            | 0  |
| 225.1                      | 0              | 0              | 0              | 0              | 100                 | 0    | 0                | 0                | 0                | 0                | 0                    | 0                        | 0                        | 0                    | 0                            | 0  |
| 264.1                      | 0              | 0              | 0              | 0              | 100                 | 0    | 0                | 0                | 0                | 0                | 0                    | 0                        | 0                        | 0                    | 0                            | 0  |
| 303.1                      | 0              | 0              | 0              | 0              | 93.8                | 10.8 | 6.3              | 10.8             | 0                | 0                | 0                    | 0                        | 0                        | 0                    | 0                            | 0  |
| 318.0                      | 0              | 0              | 0              | 0              | 25.9                | 29.2 | 74.1             | 29.2             | 0                | 0                | 0                    | 0                        | 0                        | 0                    | 0                            | 0  |
| 381.1                      | 0              | 0              | 0              | 0              | 0                   | 0    | 0                | 0                | 0                | 0                | 0                    | 0                        | 0                        | 0                    | 0                            | 0  |
| 444.1                      | 0              | 0              | 0              | 0              | 0                   | 0    | 0                | 0                | 0                | 0                | 0                    | 0                        | 0                        | 0                    | 0                            | 0  |
| 491.1                      | 0              | 0              | 0              | 0              | 0                   | 0    | 0                | 0                | 0                | 0                | 0                    | 0                        | 0                        | 0                    | 0                            | 0  |
| 564.6                      | 0              | 0              | 0              | 0              | 0                   | 0    | 0                | 0                | 0                | 0                | 0                    | 0                        | 0                        | 0                    | 0                            | 0  |
| 633.0                      | 0              | 0              | 0              | 0              | 0                   | 0    | 0                | 0                | 0                | 0                | 0                    | 0                        | 0                        | 0                    | 0                            | 0  |
| 704.1                      | 0              | 0              | 0              | 0              | 0                   | 0    | 0                | 0                | 0                | 0                | 0                    | 0                        | 0                        | 0                    | 0                            | 0  |
| 775.0                      | 0              | 0              | 0              | 0              | 0                   | 0    | 0                | 0                | 0                | 0                | 0                    | 0                        | 0                        | 0                    | 0                            | 0  |
| 942.2                      | 0              | 0              | 0              | 0              | 0                   | 0    | 0                | 0                | 0                | 0                | 0                    | 0                        | 0                        | 0                    | 0                            | 0  |
| 1108.9                     | 0              | 0              | 0              | 0              | 0                   | 0    | 0                | 0                | 0                | 0                | 0                    | 0                        | 0                        | 0                    | 0                            | 0  |
| 1277.6                     | 0              | 0              | 0              | 0              | 0                   | 0    | 0                | 0                | 0                | 0                | 0                    | 0                        | 0                        | 0                    | 0                            | 0  |
| 1443.0                     | 0              | 0              | 0              | 0              | 0                   | 0    | 0                | 0                | 0                | 0                | 0                    | 0                        | 0                        | 0                    | 0                            | 0  |
| 1610.1                     | 0              | 0              | 0              | 0              | 0                   | 0    | 0                | 0                | 0                | 0                | 0                    | 0                        | 0                        | 0                    | 0                            | 0  |
| 1873.0                     | 0              | 0              | 0              | 0              | 0                   | 0    | 0                | 0                | 0                | 0                | 0                    | 0                        | 0                        | 0                    | 0                            | 0  |
| 2135.0                     | 0              | 0              | 0              | 0              | 0                   | 0    | 0                | 0                | 0                | 0                | 0                    | 0                        | 0                        | 0                    | 0                            | 0  |
| 2398.1                     | 0              | 0              | 0              | 0              | 0                   | 0    | 0                | 0                | 0                | 0                | 0                    | 0                        | 0                        | 0                    | 0                            | 0  |
| 2654.5                     | 0              | 0              | 0              | 0              | 0                   | 0    | 0                | 0                | 0                | 0                | 0                    | 0                        | 0                        | 0                    | 0                            | 0  |
| 2854.5                     | 0              | 0              | 0              | 0              | 0                   | 0    | 0                | 0                | 0                | 0                | 0                    | 0                        | 0                        | 0                    | 0                            | 0  |
| Modified Gaussian          |                |                |                |                |                     |      |                  |                  |                  |                  |                      |                          |                          |                      |                              |    |
| L1                         | L2             | L3f            | L3m            | P              | Cumulative Gaussian |      |                  |                  |                  |                  |                      |                          |                          |                      |                              |    |
| Best-fit values            |                |                |                |                | Best-fit values     |      |                  |                  |                  |                  |                      |                          |                          |                      |                              |    |
| Amplitude                  | 120.7          | 122.6          | 116.1          | 92.69          | 55.07               | a    | 98.92            | 95.80            | 94.63            | 81.77            | Mean                 | 1715                     | Mean                     | ~ 61.40              | Reversed Cumulative Gaussian |    |
| Mean                       | 88.52          | 152.8          | 249.3          | 675.2          | 1348                | b    | 91.24            | ~ 141.1          | 243.5            | 708.8            | SD                   | 161.3                    | SD                       | ~ 0.5224             | egg                          |    |
| SD                         | 28.55          | 16.29          | 50.55          | 269.3          | 390.2               | c    | 37.81            | ~ 1.001          | 71.33            | 399.2            | Std. Error           | Std. Error               | Std. Error               | ~                    | Ambiguous                    |    |
| Amplitude                  | 5.753          | 6.717          | 6.388          | 10.25          | 5.366               | d    | 6.512            | ~ 1.000          | 21.86            | 87.09            | Mean                 | 29.42                    | Mean                     | ~                    | Best-fit values              |    |
| Mean                       | 1.304          | 0.515          | 2.785          | 40.7           | 47.87               | a    | 0.8761           | ~ 45925          | 1.474            | 4.74             | SD                   | 95% Confidence Intervals | 95% Confidence Intervals | ~                    | Mean                         |    |
| SD                         | 1.427          | 1.097          | 3.031          | 33.95          | 41.7                | b    | 0.6863           | ~ 2.439e+006     | 0.185            | 2.27             | Mean                 | 1655 to 1775             | Mean                     | (Very wide)          | SD                           |    |
| Amplitude                  | 109.0 to 132.5 | 108.8 to 136.4 | 103.0 to 129.2 | 71.70 to 113.7 | 44.08 to 66.06      | d    | 0.9975           | ~ 1.617e+008     | 2.008            | 3.096            | SD                   | 91.77 to 230.8           | SD                       | (Very wide)          | Goodness of Fit              |    |
| Mean                       | 86.85 to 92.19 | 151.8 to 153.9 | 243.6 to 255.0 | 591.9 to 758.6 | 1250 to 1446        | a    | 0.9219           |                  | 14.22            | 55.7             | Goodness of Fit      | Goodness of Fit          | Goodness of Fit          | Goodness of Fit      | df                           |    |
| SD                         | 23.63 to 29.48 | 14.04 to 18.53 | 44.34 to 56.76 | 199.7 to 338.8 | 304.8 to 475.6      | b    | 97.12 to 100.7   | (Very wide)      | 91.61 to 97.66   | 72.05 to 91.50   | R square             | 0.9573                   | R square                 | 0.9171               | 29                           |    |
| df                         | 28             | 28             | 28             | 28             | 28                  | c    | 88.83 to 92.65   | (Very wide)      | 243.1 to 243.9   | 704.2 to 713.5   | Absolute SS          | 1646                     | Absolute SS              | 2369                 | 0.9171                       |    |
| R square                   | 0.9608         | 0.9841         | 0.9433         | 0.8669         | 0.7899              | d    | 35.76 to 39.86   | (Very wide)      | 67.21 to 75.45   | 391.8 to 404.5   | Sy.x                 | 7.533                    | Sy.x                     | 9.039                | 2369                         |    |
| Absolute SS                | 1065           | 217.2          | 1770           | 12469          | 2291                |      | 4.620 to 8.404   |                  | 1.000 to 51.04   | 1.000 to 201.4   | Number of points     | Points above curve       | Points above curve       | Points above curve   | 9.039                        |    |
| Sy.x                       | 6.168          | 2.785          | 7.951          | 21.1           | 9.046               | df   | Goodness of Fit  | Goodness of Fit  | Goodness of Fit  | Goodness of Fit  | Points below curve   | Points below curve       | Points below curve       | Points below curve   | 1                            |    |
| SD                         | SD > 0.0            |      | 27               | 27               | 27               | 27               | Analyzed             | Analyzed                 | Analyzed                 | Analyzed             | 1                            |    |
| Number of points           | 31             | 31             | 31             | 31             | 31                  |      | 0.9992           | 0.5915           | 0.9944           | 0.882            | Number of runs       | Number of runs           | Number of runs           | Number of runs       | 2                            |    |
| Analyzed                   | 31             | 31             | 31             | 31             | 31                  |      | 22.16            | 5577             | 174.9            | 4852             | P value (runs test)  | P value (runs test)      | P value (runs test)      | P value (runs test)  | 1                            |    |
|                            |                |                |                |                |                     |      | 0.906            | 14.37            | 2.545            | 13.41            | Deviation from Model | Deviation from Model     | Deviation from Model     | Deviation from Model | Not Significant              |    |
|                            |                |                |                |                |                     |      | Constraints      | Constraints      | Constraints      | Constraints      | Number of points     | Number of points         | Number of points         | Number of points     | 31                           |    |
|                            |                |                |                |                |                     |      | c > 0.0          | c > 0.0          | c > 0.0          | c > 0.0          | Analyzed             | Analyzed                 | Analyzed                 | Analyzed             |                              |    |
|                            |                |                |                |                |                     |      | d > 1.000        | d > 1.000        | d > 1.000        | d > 1.000        |                      |                          |                          |                      |                              |    |
|                            |                |                |                |                |                     |      | Number of points | Number of points | Number of points | Number of points |                      |                          |                          |                      |                              |    |
|                            |                |                |                |                |                     |      | Analyzed         | Analyzed         | Analyzed         | Analyzed         |                      |                          |                          |                      |                              |    |

*L. sericata* 17.5° C.

| L. sericata 17.5° C          |      |                 |                |                 |                |                 |      |                 |                |                   |                |                     |                          |                          |                          |                 |  |
|------------------------------|------|-----------------|----------------|-----------------|----------------|-----------------|------|-----------------|----------------|-------------------|----------------|---------------------|--------------------------|--------------------------|--------------------------|-----------------|--|
| Dataset                      |      |                 |                |                 |                |                 |      |                 |                |                   |                |                     |                          |                          |                          |                 |  |
| Time                         | egg  |                 | L1             |                 | L2             |                 | L3f  |                 | L3m            |                   | P              |                     | A                        |                          |                          |                 |  |
|                              | Mean | SE              | Mean           | SE              | Mean           | SE              | Mean | SE              | Mean           | SE                | Mean           | SE                  | Mean                     | SE                       |                          |                 |  |
| 0.0                          | 100  | 0               | 0              | 0               | 0              | 0               | 0    | 0               | 0              | 0                 | 0              | 0                   | 0                        | 0                        | 0                        | 0               |  |
| 12.1                         | 100  | 0               | 0              | 0               | 0              | 0               | 0    | 0               | 0              | 0                 | 0              | 0                   | 0                        | 0                        | 0                        | 0               |  |
| 24.2                         | 100  | 0               | 0              | 0               | 0              | 0               | 0    | 0               | 0              | 0                 | 0              | 0                   | 0                        | 0                        | 0                        | 0               |  |
| 36.2                         | 55.8 | 21.5            | 44.2           | 21.5            | 0              | 0               | 0    | 0               | 0              | 0                 | 0              | 0                   | 0                        | 0                        | 0                        | 0               |  |
| 48.3                         | 54.8 | 19.4            | 45.2           | 19.4            | 0              | 0               | 0    | 0               | 0              | 0                 | 0              | 0                   | 0                        | 0                        | 0                        | 0               |  |
| 60.2                         | 65   | 28.3            | 35             | 28.3            | 0              | 0               | 0    | 0               | 0              | 0                 | 0              | 0                   | 0                        | 0                        | 0                        | 0               |  |
| 79.1                         | 0    | 0               | 91.2           | 15.3            | 8.8            | 15.3            | 0    | 0               | 0              | 0                 | 0              | 0                   | 0                        | 0                        | 0                        | 0               |  |
| 98.2                         | 0    | 0               | 1.4            | 2.4             | 98.6           | 2.4             | 0    | 0               | 0              | 0                 | 0              | 0                   | 0                        | 0                        | 0                        | 0               |  |
| 117.1                        | 0    | 0               | 0              | 0               | 93.8           | 10.8            | 6.3  | 10.8            | 0              | 0                 | 0              | 0                   | 0                        | 0                        | 0                        | 0               |  |
| 136.1                        | 0    | 0               | 0              | 0               | 53.1           | 47.1            | 46.9 | 47.1            | 0              | 0                 | 0              | 0                   | 0                        | 0                        | 0                        | 0               |  |
| 155.1                        | 0    | 0               | 0              | 0               | 0              | 0               | 100  | 0               | 0              | 0                 | 0              | 0                   | 0                        | 0                        | 0                        | 0               |  |
| 181.1                        | 0    | 0               | 0              | 0               | 0              | 0               | 100  | 0               | 0              | 0                 | 0              | 0                   | 0                        | 0                        | 0                        | 0               |  |
| 207.1                        | 0    | 0               | 0              | 0               | 0              | 0               | 93.8 | 10.8            | 6.3            | 10.8              | 0              | 0                   | 0                        | 0                        | 0                        | 0               |  |
| 233.1                        | 0    | 0               | 0              | 0               | 0              | 0               | 31.6 | 42.9            | 31.6           | 42.9              | 0              | 0                   | 0                        | 0                        | 0                        | 0               |  |
| 259.1                        | 0    | 0               | 0              | 0               | 0              | 0               | 17.5 | 20.5            | 20.5           | 20.5              | 0              | 0                   | 0                        | 0                        | 0                        | 0               |  |
| 285.2                        | 0    | 0               | 0              | 0               | 0              | 0               | 0    | 0               | 0              | 97.2              | 4.8            | 2.8                 | 4.8                      | 0                        | 0                        | 0               |  |
| 333.1                        | 0    | 0               | 0              | 0               | 0              | 0               | 0    | 0               | 0              | 30.4              | 34.2           | 69.6                | 34.2                     | 0                        | 0                        | 0               |  |
| 381.1                        | 0    | 0               | 0              | 0               | 0              | 0               | 0    | 0               | 0              | 26.4              | 35.7           | 73.6                | 35.7                     | 0                        | 0                        | 0               |  |
| 429.1                        | 0    | 0               | 0              | 0               | 0              | 0               | 0    | 0               | 0              | 6.3               | 10.8           | 93.8                | 10.8                     | 0                        | 0                        | 0               |  |
| 477.1                        | 0    | 0               | 0              | 0               | 0              | 0               | 0    | 0               | 0              | 10.7              | 11.8           | 89.3                | 11.8                     | 0                        | 0                        | 0               |  |
| 525.1                        | 0    | 0               | 0              | 0               | 0              | 0               | 0    | 0               | 0              | 29.9              | 31.8           | 70.1                | 31.8                     | 0                        | 0                        | 0               |  |
| 635.0                        | 0    | 0               | 0              | 0               | 0              | 0               | 0    | 0               | 0              | 5.8               | 6.1            | 94.2                | 6.1                      | 0                        | 0                        | 0               |  |
| 745.1                        | 0    | 0               | 0              | 0               | 0              | 0               | 0    | 0               | 0              | 9.4               | 9.4            | 49                  | 38.4                     | 44.3                     | 38                       | 0               |  |
| 855.0                        | 0    | 0               | 0              | 0               | 0              | 0               | 0    | 0               | 0              | 16.7              | 16.7           | 0                   | 0                        | 83.3                     | 16.7                     | 0               |  |
| 965.1                        | 0    | 0               | 0              | 0               | 0              | 0               | 0    | 0               | 0              | 0                 | 0              | 0                   | 0                        | 100                      | 0                        | 0               |  |
| 1075.0                       | 0    | 0               | 0              | 0               | 0              | 0               | 0    | 0               | 0              | 3.6               | 6.2            | 0                   | 0                        | 96.4                     | 6.2                      | 0               |  |
| 1288.2                       | 0    | 0               | 0              | 0               | 0              | 0               | 0    | 0               | 0              | 0                 | 0              | 0                   | 0                        | 100                      | 0                        | 0               |  |
| 1427.0                       | 0    | 0               | 0              | 0               | 0              | 0               | 0    | 0               | 0              | 0                 | 0              | 0                   | 0                        | 100                      | 0                        | 0               |  |
| 1603.0                       | 0    | 0               | 0              | 0               | 0              | 0               | 0    | 0               | 0              | 0                 | 0              | 0                   | 0                        | 100                      | 0                        | 0               |  |
| 1780.8                       | 0    | 0               | 0              | 0               | 0              | 0               | 0    | 0               | 0              | 0                 | 0              | 0                   | 0                        | 100                      | 0                        | 0               |  |
| 1923.5                       | 0    | 0               | 0              | 0               | 0              | 0               | 0    | 0               | 0              | 0                 | 0              | 0                   | 0                        | 100                      | 0                        | 0               |  |
| Reversed Cumulative Gaussian |      |                 |                |                 |                |                 |      |                 |                |                   |                |                     |                          |                          |                          |                 |  |
| L1                           |      | L2              |                | L3              |                | L3m             |      | P               |                | Modified Gaussian |                | Cumulative Gaussian |                          | A                        |                          | egg             |  |
|                              |      | Best-fit values |                | Best-fit values |                | Best-fit values |      | Best-fit values |                | Best-fit values   |                | Best-fit values     |                          | Best-fit values          |                          | Best-fit values |  |
| Amplitude                    |      | 69.53           | 110.8          | 112.5           | 98.06          | 100.7           | a    | 119.3           | 98.2           | 101.5             | 102.6          | 94.2                | Mean                     | 764.2                    | Mean                     | 54.12           |  |
| Mean                         |      | 68.86           | 111.1          | 185.6           | 280.5          | 539.1           | b    | 73.47 ~ 108.9   | ~ 108.9        | 186.6             | 279.7          | 414.9               | SD                       | 82.17                    | SD                       | 24.41           |  |
| SD                           |      | 20.41           | 18.08          | 37.58           | 35.81          | 151.5           | c    | 7.883 ~ 26.94   | ~ 26.94        | 45.85             | 31.39          | 9.889               | Std. Error               | Std. Error               | Std. Error               | 24.41           |  |
| 95% Confidence Intervals     |      | Mean            | Mean           | Mean            | Mean           | Mean            | d    | ~ 1.000         | ~ 15.67        | 3.631             | 1.556          | 1                   | Mean                     | 2.771                    | Mean                     | 2.465           |  |
| Mean                         |      | 8.814           | 4.498          | 4.179           | 7.248          | 7.289           |      |                 |                |                   |                |                     | SD                       | 4.003                    | SD                       | 3.671           |  |
| Mean                         |      | 2.773           | 0.8477         | 1.534           | 3.514          | 13.25           | a    | 87.68           | 0.6847         | 2.419             | 12.06          | 3149                | 95% Confidence Intervals | 95% Confidence Intervals | 95% Confidence Intervals | 3.671           |  |
| SD                           |      | 2.853           | 0.8529         | 1.524           | 3.061          | 11.74           | b    | 2.543 ~ 2882    | ~ 2882         | 0.7942            | 4.164          | 101.2               | Mean                     | 758.6 to 769.9           | Mean                     | 45.02 to 59.22  |  |
| 95% Confidence Intervals     |      | Mean            | Mean           | Mean            | Mean           | Mean            | c    | 11 ~ 3539       | ~ 3539         | 1.185             | 8.701          | 463.5               | SD                       | 73.99 to 90.36           | SD                       | 16.90 to 31.92  |  |
| Mean                         |      | 51.48 to 87.58  | 101.6 to 120.0 | 104.0 to 121.1  | 83.21 to 112.9 | 85.80 to 115.7  | d    |                 |                | 0.3222            | 0.515          | 19.93               | Goodness of Fit          | Goodness of Fit          | Goodness of Fit          | 29              |  |
| SD                           |      | 63.18 to 74.54  | 109.3 to 112.8 | 182.4 to 186.7  | 273.3 to 287.7 | 512.0 to 566.2  | a    | -60.58 to 299.2 | 94.84 to 97.56 | 96.58 to 106.5    | 77.81 to 127.3 | -6368 to 6566       | R square                 | 0.9889                   | R square                 | 0.9555          |  |
| Goodness of Fit              |      | Mean            | Mean           | Mean            | Mean           | Mean            | b    | 68.26 to 78.69  | (Very wide)    | 184.9 to 188.2    | 271.2 to 288.3 | 207.1 to 622.6      | Absolute SS              | 69.74                    | Absolute SS              | 1470            |  |
| df                           |      | 28              | 28             | 28              | 28             | 28              | c    | 0.0 to 30.45    | (Very wide)    | 43.42 to 48.28    | 13.54 to 49.25 | 0.0 to 961.1        | Sy.x                     | 1.551                    | Sy.x                     | 7.12            |  |
| R square                     |      | 0.7551          | 0.9671         | 0.9707          | 0.8773         | 0.8875          | d    |                 |                |                   |                |                     | df                       | 29                       | df                       | 29              |  |
| Absolute SS                  |      | 2944            | 636.9          | 845.5           | 2069           | 3795            |      |                 |                |                   |                |                     | Number of points         | 31                       | Number of points         | 31              |  |
| Sy.x                         |      | 10.25           | 4.769          | 5.495           | 8.596          | 11.64           |      |                 |                |                   |                |                     | Points above curve       | 4                        | Points above curve       | 4               |  |
| Constraints                  |      | Mean            | Mean           | Mean            | Mean           | Mean            | a    |                 |                |                   |                |                     | Points below curve       | 10                       | Points below curve       | 10              |  |
| SD                           |      | SD > 0.0        | SD > 0.0       | SD > 0.0        | SD > 0.0       | SD > 0.0        | b    |                 |                |                   |                |                     | P value (runs test)      | 0.9555                   | P value (runs test)      | 0.0679          |  |
| Number of points             |      | 31              | 31             | 31              | 31             | 31              | c    |                 |                |                   |                |                     | Deviation from Model     | Not Significant          | Deviation from Model     | Not Significant |  |
| Analyzed                     |      |                 |                |                 |                |                 | d    |                 |                |                   |                |                     | Number of points         | 31                       | Number of points         | 31              |  |
|                              |      |                 |                |                 |                |                 |      |                 |                |                   |                |                     | Analyzed                 |                          | Analyzed                 |                 |  |

*L. sericata* 20.0° C.

[illegible]

[illegible]

*L. sericata* 25.0° C.

| L. sericata 25.0° C      |                |                |                |                |                   |                 |                |                |                |                      |                          |        |            |        |  |
|--------------------------|----------------|----------------|----------------|----------------|-------------------|-----------------|----------------|----------------|----------------|----------------------|--------------------------|--------|------------|--------|--|
| Dataset                  |                |                |                |                |                   |                 |                |                |                |                      |                          |        |            |        |  |
| Time                     | egg            |                | L1             |                | L2                |                 | L3f            |                | L3m            |                      | P                        |        | A          |        |  |
|                          | Mean           | SE             | Mean           | SE             | Mean              | SE              | Mean           | SE             | Mean           | SE                   | Mean                     | SE     | Mean       | SE     |  |
| 0.0                      | 100            | 0              | 0              | 0              | 0                 | 0               | 0              | 0              | 0              | 0                    | 0                        | 0      | 0          | 0      |  |
| 6.1                      | 100            | 0              | 0              | 0              | 0                 | 0               | 0              | 0              | 0              | 0                    | 0                        | 0      | 0          | 0      |  |
| 12.1                     | 100            | 0              | 0              | 0              | 0                 | 0               | 0              | 0              | 0              | 0                    | 0                        | 0      | 0          | 0      |  |
| 18.3                     | 29.3           | 23.9           | 70.7           | 23.9           | 0                 | 0               | 0              | 0              | 0              | 0                    | 0                        | 0      | 0          | 0      |  |
| 24.2                     | 5.2            | 3.3            | 94.8           | 3.3            | 0                 | 0               | 0              | 0              | 0              | 0                    | 0                        | 0      | 0          | 0      |  |
| 30.1                     | 6.6            | 4.4            | 93.4           | 4.4            | 0                 | 0               | 0              | 0              | 0              | 0                    | 0                        | 0      | 0          | 0      |  |
| 38.2                     | 0              | 0              | 12.5           | 21.7           | 87.5              | 21.7            | 0              | 0              | 0              | 0                    | 0                        | 0      | 0          | 0      |  |
| 48.3                     | 0              | 0              | 0              | 0              | 100               | 0               | 0              | 0              | 0              | 0                    | 0                        | 0      | 0          | 0      |  |
| 57.1                     | 0              | 0              | 0              | 0              | 84.8              | 22.5            | 15.2           | 22.5           | 0              | 0                    | 0                        | 0      | 0          | 0      |  |
| 66.1                     | 0              | 0              | 0              | 0              | 23.8              | 10.6            | 76.2           | 10.6           | 0              | 0                    | 0                        | 0      | 0          | 0      |  |
| 75.1                     | 0              | 0              | 0              | 0              | 0                 | 0               | 100            | 0              | 0              | 0                    | 0                        | 0      | 0          | 0      |  |
| 88.1                     | 0              | 0              | 0              | 0              | 0                 | 0               | 100            | 0              | 0              | 0                    | 0                        | 0      | 0          | 0      |  |
| 101.0                    | 0              | 0              | 0              | 0              | 0                 | 0               | 100            | 0              | 0              | 0                    | 0                        | 0      | 0          | 0      |  |
| 114.1                    | 0              | 0              | 0              | 0              | 0                 | 0               | 18.8           | 15.3           | 81.2           | 15.3                 | 0                        | 0      | 0          | 0      |  |
| 127.1                    | 0              | 0              | 0              | 0              | 0                 | 0               | 4.8            | 97.2           | 4.8            | 0                    | 0                        | 0      | 0          | 0      |  |
| 140.3                    | 0              | 0              | 0              | 0              | 0                 | 0               | 2.7            | 98.4           | 2.7            | 0                    | 0                        | 0      | 0          | 0      |  |
| 164.3                    | 0              | 0              | 0              | 0              | 0                 | 0               | 0              | 0              | 59.9           | 24.1                 | 40.1                     | 24.1   | 0          | 0      |  |
| 188.1                    | 0              | 0              | 0              | 0              | 0                 | 0               | 0              | 0              | 9.2            | 6.1                  | 90.8                     | 6.1    | 0          | 0      |  |
| 212.1                    | 0              | 0              | 0              | 0              | 0                 | 0               | 0              | 0              | 5.4            | 5.9                  | 94.6                     | 5.9    | 0          | 0      |  |
| 236.0                    | 0              | 0              | 0              | 0              | 0                 | 0               | 0              | 0              | 0              | 0                    | 100                      | 0      | 0          | 0      |  |
| 260.0                    | 0              | 0              | 0              | 0              | 0                 | 0               | 0              | 0              | 3.1            | 5.4                  | 96.9                     | 5.4    | 0          | 0      |  |
| 316.0                    | 0              | 0              | 0              | 0              | 0                 | 0               | 0              | 0              | 0              | 0                    | 100                      | 0      | 0          | 0      |  |
| 372.0                    | 0              | 0              | 0              | 0              | 0                 | 0               | 0              | 0              | 0              | 0                    | 100                      | 0      | 0          | 0      |  |
| 428.0                    | 0              | 0              | 0              | 0              | 0                 | 0               | 0              | 0              | 0              | 0                    | 46.6                     | 24.5   | 53.4       | 24.5   |  |
| 484.0                    | 0              | 0              | 0              | 0              | 0                 | 0               | 0              | 0              | 0              | 0                    | 3.1                      | 96.9   | 3.1        | 96.9   |  |
| 540.0                    | 0              | 0              | 0              | 0              | 0                 | 0               | 0              | 0              | 0              | 0                    | 6.9                      | 8.8    | 93.1       | 8.8    |  |
| 540.0                    | 0              | 0              | 0              | 0              | 0                 | 0               | 0              | 0              | 0              | 0                    | 0                        | 0      | 100        | 0      |  |
| 540.0                    | 0              | 0              | 0              | 0              | 0                 | 0               | 0              | 0              | 0              | 0                    | 0                        | 0      | 100        | 0      |  |
| 540.0                    | 0              | 0              | 0              | 0              | 0                 | 0               | 0              | 0              | 0              | 0                    | 0                        | 0      | 100        | 0      |  |
| Gaussian                 |                |                |                |                |                   |                 |                |                |                |                      |                          |        |            |        |  |
| L1                       | L2             | L3             | L3m            | P              | Modified Gaussian |                 |                |                |                | Cumulative Gaussian  |                          |        |            |        |  |
| Best-fit values          |                |                |                |                | Ambiguous         |                 |                |                |                | A                    |                          |        |            |        |  |
| Best-fit values          |                |                |                |                | Best-fit values   |                 |                |                |                | Best-fit values      |                          |        |            |        |  |
| Amplitude                | 107            | 112            | 118.4          | 109.1          | 116.9             | 94.15           | 93.49          | 101.7          | 97.81          | 98.01                | Mean                     | 370.1  | Mean       | 17.3   |  |
| Mean                     | 25.86          | 48.76          | 86             | 138.4          | 269.3             | 27.01           | 49.58          | 86.15          | 137.8          | 269.2                | SD                       | 24.86  | SD         | 1.84   |  |
| SD                       | 6.825          | 9.867          | 17.02          | 21.81          | 70.5              | 9.584           | 14             | 22.45          | 26.61          | 98.6                 | Std. Error               | 0.8794 | Std. Error | 0.6314 |  |
| 95% Confidence Intervals |                |                |                |                | Std. Error        |                 |                |                |                | Mean                 |                          |        |            |        |  |
| Amplitude                | 3.563          | 4.864          | 5.608          | 5.564          | 6.253             | 5.795           | 6.173          | 5.401          | 8.376          | 9.427                | SD                       | 3.293  | SD         | 1.153  |  |
| Mean                     | 0.2986         | 0.4977         | 0.8739         | 1.383          | 4.487             | 0.1379          | 1.546          | 0.7683         | 1.522          | 0.8625               | 95% Confidence Intervals |        |            |        |  |
| SD                       | 0.301          | 0.4869         | 0.88           | 1.287          | 4.066             | 0.1274          | 0.277          | 0.1174         | 2.121          | 0.3694               | Mean                     |        |            |        |  |
| 95% Confidence Intervals |                |                |                |                | Goodness of Fit   |                 |                |                |                | Goodness of Fit      |                          |        |            |        |  |
| Amplitude                | 99.70 to 114.3 | 102.1 to 122.0 | 107.0 to 120.9 | 97.75 to 120.5 | 104.0 to 120.7    | 0.4336          | 0.7686         | 0.1951         | 12.26          | 1.012                | Goodness of Fit          |        |            |        |  |
| Mean                     | 25.24 to 26.47 | 47.74 to 49.78 | 84.21 to 87.79 | 135.5 to 141.2 | 260.1 to 276.5    | 0.07418         | 0.3318         | 0.1886         | 2.213          | 0.6882               | R square                 |        |            |        |  |
| SD                       | 6.209 to 7.442 | 8.669 to 10.86 | 15.22 to 18.62 | 19.17 to 24.44 | 62.17 to 78.83    | 93.87 to 94.44  | 90.32 to 96.66 | 100.2 to 103.3 | 94.69 to 100.9 | 96.24 to 99.78       | df                       |        |            |        |  |
| df                       | 28             | 28             | 28             | 28             | 28                | 26.74 to 27.27  | 49.01 to 50.15 | 85.91 to 86.39 | 133.4 to 142.1 | 268.4 to 269.9       | R square                 |        |            |        |  |
| R square                 | 0.9764         | 0.9613         | 0.9547         | 0.9456         | 0.9375            | 9.432 to 9.736  | 13.32 to 14.68 | 22.06 to 22.83 | 22.07 to 31.15 | 97.23 to 98.97       | Absolute SS              |        |            |        |  |
| Absolute SS              | 482.8          | 874.8          | 1399           | 1380           | 2474              | 4.905 to 6.685  | 4.600 to 7.746 | 5.001 to 5.801 | 1.000 to 33.53 | 7.350 to 11.50       | Syx                      |        |            |        |  |
| Syx                      | 4.152          | 5.59           | 7.067          | 7.02           | 9.401             | Goodness of Fit |                |                |                |                      | Number of points         |        |            |        |  |
| Constraints              |                |                |                |                | R square          |                 |                |                |                | Points above curve   |                          |        |            |        |  |
| SD                       | SD > 0.0          | 1               | 0.953          | 0.999          | 0.9951         | 0.9981               | Points below curve       |        |            |        |  |
| Number of points         | 31             | 31             | 31             | 31             | 31                | 0.9612          | 106.9          | 32.11          | 124.1          | 76.43                | Number of runs           |        |            |        |  |
| Analyzed                 |                |                |                |                |                   | 0.1887          | 1.99           | 1.091          | 2.144          | 1.682                | P value (runs test)      |        |            |        |  |
| Constraints              |                |                |                |                | c > 0.0           |                 |                |                |                | Deviation from Model |                          |        |            |        |  |
| Constraints              |                |                |                |                | d > 1.000         |                 |                |                |                | Not Significant      |                          |        |            |        |  |
| Constraints              |                |                |                |                | d > 1.000         |                 |                |                |                | Number of points     |                          |        |            |        |  |
| Constraints              |                |                |                |                | 31                |                 |                |                |                | Analyzed             |                          |        |            |        |  |
| Constraints              |                |                |                |                | 31                |                 |                |                |                | 31                   |                          |        |            |        |  |



*L. sericata* 27.5° C.

[illegible]

*L. sericata* 30.0° C.

| L. sericata 30.0° C          |                |                |                |                |                |      |                          |                 |                |                 |                          |                 |                  |                 |
|------------------------------|----------------|----------------|----------------|----------------|----------------|------|--------------------------|-----------------|----------------|-----------------|--------------------------|-----------------|------------------|-----------------|
| Dataset                      |                |                |                |                |                |      |                          |                 |                |                 |                          |                 |                  |                 |
| Time                         | egg            |                | L1             |                | L2             |      | L3f                      |                 | L3m            |                 | P                        |                 | A                |                 |
|                              | Mean           | SE             | Mean           | SE             | Mean           | SE   | Mean                     | SE              | Mean           | SE              | Mean                     | SE              | Mean             | SE              |
| 0.0                          | 100            | 0              | 0              | 0              | 0              | 0    | 0                        | 0               | 0              | 0               | 0                        | 0               | 0                | 0               |
| 4.1                          | 100            | 0              | 0              | 0              | 0              | 0    | 0                        | 0               | 0              | 0               | 0                        | 0               | 0                | 0               |
| 8.1                          | 86.5           | 15.6           | 13.5           | 15.6           | 0              | 0    | 0                        | 0               | 0              | 0               | 0                        | 0               | 0                | 0               |
| 12.1                         | 29.7           | 20.3           | 70.3           | 20.3           | 0              | 0    | 0                        | 0               | 0              | 0               | 0                        | 0               | 0                | 0               |
| 15.3                         | 37.1           | 15.3           | 62.9           | 15.3           | 0              | 0    | 0                        | 0               | 0              | 0               | 0                        | 0               | 0                | 0               |
| 20.2                         | 54.4           | 13.8           | 45.6           | 13.8           | 0              | 0    | 0                        | 0               | 0              | 0               | 0                        | 0               | 0                | 0               |
| 27.2                         | 0              | 0              | 0              | 0              | 100            | 0    | 0                        | 0               | 0              | 0               | 0                        | 0               | 0                | 0               |
| 34.2                         | 0              | 0              | 0              | 0              | 100            | 0    | 0                        | 0               | 0              | 0               | 0                        | 0               | 0                | 0               |
| 41.3                         | 0              | 0              | 0              | 0              | 49.6           | 43.6 | 50.4                     | 43.6            | 0              | 0               | 0                        | 0               | 0                | 0               |
| 48.2                         | 0              | 0              | 0              | 0              | 15             | 22.3 | 85                       | 22.3            | 0              | 0               | 0                        | 0               | 0                | 0               |
| 55.2                         | 0              | 0              | 0              | 0              | 0              | 0    | 100                      | 0               | 0              | 0               | 0                        | 0               | 0                | 0               |
| 65.1                         | 0              | 0              | 0              | 0              | 0              | 0    | 100                      | 0               | 0              | 0               | 0                        | 0               | 0                | 0               |
| 75.2                         | 0              | 0              | 0              | 0              | 0              | 0    | 97.4                     | 3.6             | 2.6            | 3.6             | 0                        | 0               | 0                | 0               |
| 85.1                         | 0              | 0              | 0              | 0              | 0              | 0    | 77.3                     | 39.4            | 22.7           | 39.4            | 0                        | 0               | 0                | 0               |
| 95.1                         | 0              | 0              | 0              | 0              | 0              | 0    | 0                        | 0               | 100            | 0               | 0                        | 0               | 0                | 0               |
| 101.1                        | 0              | 0              | 0              | 0              | 0              | 0    | 3.3                      | 5.8             | 96.7           | 5.8             | 0                        | 0               | 0                | 0               |
| 123.0                        | 0              | 0              | 0              | 0              | 0              | 0    | 0                        | 0               | 86.5           | 15.4            | 13.5                     | 15.4            | 0                | 0               |
| 141.1                        | 0              | 0              | 0              | 0              | 0              | 0    | 0                        | 0               | 46.7           | 31.3            | 53.3                     | 31.3            | 0                | 0               |
| 159.3                        | 0              | 0              | 0              | 0              | 0              | 0    | 1.7                      | 2.9             | 4.5            | 7.9             | 93.8                     | 7.4             | 0                | 0               |
| 177.0                        | 0              | 0              | 0              | 0              | 0              | 0    | 0                        | 0               | 3.2            | 3.2             | 96.8                     | 3.2             | 0                | 0               |
| 195.0                        | 0              | 0              | 0              | 0              | 0              | 0    | 0                        | 0               | 1.7            | 2.9             | 98.3                     | 2.9             | 0                | 0               |
| 237.0                        | 0              | 0              | 0              | 0              | 0              | 0    | 0                        | 0               | 0              | 0               | 100                      | 0               | 0                | 0               |
| 279.0                        | 0              | 0              | 0              | 0              | 0              | 0    | 0                        | 0               | 0              | 0               | 88.7                     | 12.1            | 11.3             | 12.1            |
| 322.0                        | 0              | 0              | 0              | 0              | 0              | 0    | 0                        | 0               | 0              | 0               | 6.3                      | 10.8            | 93.8             | 10.8            |
| 363.0                        | 0              | 0              | 0              | 0              | 0              | 0    | 0                        | 0               | 0              | 0               | 18.4                     | 7.8             | 81.6             | 7.8             |
| 405.0                        | 0              | 0              | 0              | 0              | 0              | 0    | 0                        | 0               | 0              | 0               | 0                        | 0               | 100              | 0               |
| 405.0                        | 0              | 0              | 0              | 0              | 0              | 0    | 0                        | 0               | 0              | 0               | 0                        | 0               | 100              | 0               |
| 405.0                        | 0              | 0              | 0              | 0              | 0              | 0    | 0                        | 0               | 0              | 0               | 0                        | 0               | 100              | 0               |
| 405.0                        | 0              | 0              | 0              | 0              | 0              | 0    | 0                        | 0               | 0              | 0               | 0                        | 0               | 100              | 0               |
| 405.0                        | 0              | 0              | 0              | 0              | 0              | 0    | 0                        | 0               | 0              | 0               | 0                        | 0               | 100              | 0               |
| Cumulative Gaussian          |                |                |                |                |                |      |                          |                 |                |                 |                          |                 |                  |                 |
| Reversed Cumulative Gaussian |                |                |                |                |                |      |                          |                 |                |                 |                          |                 |                  |                 |
| egg                          |                |                |                |                |                |      |                          |                 |                |                 |                          |                 |                  |                 |
| Best-fit values              |                |                |                |                |                |      |                          |                 |                |                 |                          |                 |                  |                 |
| Amplitude                    | 72.83          | 115.8          | 116.7          | 119            | 119.9          | a    | 66.6                     | 100             | 97.92          | 94.4            | Mean                     | 297.9           | Mean             | Best-fit values |
| Mean                         | 15.25          | 32.23          | 64.77          | 111.8          | 218.8          | b    | ~ 14.42                  | ~ 31.45         | 64.92 ~ 113.4  | SD              | 15.65                    | SD              | 297.9            | Mean            |
| SD                           | 4.603          | 6.444          | 16.43          | 17.93          | 56.47          | c    | ~ 5.882                  | ~ 9.729         | 22.43 ~ 27.40  | SD              | 15.65                    | SD              | 15.65            | SD              |
| Std. Error                   |                |                |                |                |                |      |                          |                 |                |                 |                          |                 |                  |                 |
| Amplitude                    | 3.116          | 5.373          | 6.105          | 7.008          | 6.776          | d    | ~ 16.22                  | ~ 26.58         | 6.59 ~ 31.94   | Mean            | 2.477                    | Mean            | 2.477            | Mean            |
| Mean                         | 0.2472         | 0.3465         | 0.9292         | 0.9427         | 3.453          | a    | Std. Error               |                 | 1.007          | 2.887           | 95% Confidence Intervals | 1.886           | SD               | 1.629           |
| SD                           | 0.2527         | 0.3402         | 0.9256         | 1.093          | 3.32           | b    | ~ 2388                   | ~ 8.079e+006    | 0.1622 ~ 591.7 | Mean            | 292.9 to 303.0           | Mean            | 292.9 to 303.0   | Mean            |
| 95% Confidence Intervals     |                |                |                |                |                |      |                          |                 |                |                 |                          |                 |                  |                 |
| Amplitude                    | 66.45 to 79.21 | 104.8 to 126.8 | 104.2 to 128.2 | 104.6 to 133.3 | 106.0 to 133.8 | d    | ~ 1531                   | ~ 9.121e+006    | 0.1795 ~ 972.1 | SD              | 11.80 to 19.51           | SD              | 11.80 to 19.51   | SD              |
| Mean                         | 14.75 to 15.76 | 31.52 to 32.94 | 62.87 to 66.67 | 109.9 to 113.7 | 211.7 to 225.8 | c    | ~ 144794                 | ~ 2.829e+008    | 0.3966 ~ 57806 | Goodness of Fit | Goodness of Fit          | Goodness of Fit | Goodness of Fit  | Goodness of Fit |
| SD                           | 4.085 to 5.120 | 5.748 to 7.141 | 14.53 to 18.32 | 15.70 to 20.17 | 49.67 to 63.27 | a    | 95% Confidence Intervals |                 | df             | 29              | df                       | 29              | df               | 29              |
| Goodness of Fit              |                |                |                |                |                |      |                          |                 |                |                 |                          |                 |                  |                 |
| df                           | 28             | 28             | 28             | 28             | 28             | c    | 64.53 to 68.67           | 94.08 to 105.95 | 95.97 to 99.87 | 91.11 to 97.69  | R square                 | 0.9959          | R square         | 0.9959          |
| R square                     | 0.9627         | 0.9566         | 0.9423         | 0.9465         | 0.9346         | d    | (Very wide)              | (Very wide)     | (Very wide)    | (Very wide)     | Absolute SS              | 338.5           | Absolute SS      | 338.5           |
| Absolute SS                  | 371.9          | 885.5          | 2115           | 1352           | 2530           | b    | (Very wide)              | (Very wide)     | (Very wide)    | (Very wide)     | Sy.x                     | 3.416           | Sy.x             | 3.416           |
| Sy.x                         | 3.645          | 5.624          | 8.691          | 6.949          | 9.505          | df   | (Very wide)              | (Very wide)     | (Very wide)    | (Very wide)     | Number of points         | 31              | Number of points | 31              |
| Goodness of Fit              |                |                |                |                |                |      |                          |                 |                |                 |                          |                 |                  |                 |
| R square                     |                |                |                |                |                |      |                          |                 |                |                 |                          |                 |                  |                 |
| Absolute SS                  |                |                |                |                |                |      |                          |                 |                |                 |                          |                 |                  |                 |
| Sy.x                         |                |                |                |                |                |      |                          |                 |                |                 |                          |                 |                  |                 |
| Constraints                  |                |                |                |                |                |      |                          |                 |                |                 |                          |                 |                  |                 |
| SD > 0.0                     | SD > 0.0       | SD > 0.0       | SD > 0.0       | SD > 0.0       | SD > 0.0       | a    | 0.9973                   | 0.989           | 0.9979         | 0.9945          | Number of points         | 31              | Number of points | 31              |
| Number of points             |                |                |                |                |                |      |                          |                 |                |                 |                          |                 |                  |                 |
| Number of points             | 31             | 31             | 31             | 31             | 31             | c    | c > 0.0                  | c > 0.0         | c > 0.0        | c > 0.0         | Number of points         | 31              | Number of points | 31              |
| Analyzed                     |                |                |                |                |                | d    | d > 1.000                | d > 1.000       | d > 1.000      | d > 1.000       | Analyzed                 |                 | Analyzed         |                 |

*L. sericata* 32.5° C.

| L. sericata 32.5° C |      |      |      |      |                   |    |                 |                 |      |      |      |      |                              |      |  |
|---------------------|------|------|------|------|-------------------|----|-----------------|-----------------|------|------|------|------|------------------------------|------|--|
| Dataset             |      |      |      |      |                   |    |                 |                 |      |      |      |      |                              |      |  |
| Time                | egg  |      | L1   |      | L2                |    | L3f             |                 | L3m  |      | P    |      | A                            |      |  |
|                     | Mean | SE   | Mean | SE   | Mean              | SE | Mean            | SE              | Mean | SE   | Mean | SE   | Mean                         | SE   |  |
| 0                   | 100  | 0    | 0    | 0    | 0                 | 0  | 0               | 0               | 0    | 0    | 0    | 0    | 0                            | 0    |  |
| 5.1                 | 100  | 0    | 0    | 0    | 0                 | 0  | 0               | 0               | 0    | 0    | 0    | 0    | 0                            | 0    |  |
| 10.1                | 51.1 | 30.2 | 48.9 | 30.2 | 0                 | 0  | 0               | 0               | 0    | 0    | 0    | 0    | 0                            | 0    |  |
| 15.3                | 29.9 | 36   | 70.1 | 36   | 0                 | 0  | 0               | 0               | 0    | 0    | 0    | 0    | 0                            | 0    |  |
| 20.3                | 33.1 | 25.5 | 66.9 | 25.5 | 0                 | 0  | 0               | 0               | 0    | 0    | 0    | 0    | 0                            | 0    |  |
| 25.2                | 14.6 | 9.6  | 85.4 | 9.6  | 0                 | 0  | 0               | 0               | 0    | 0    | 0    | 0    | 0                            | 0    |  |
| 33.2                | 0    | 0    | 10.7 | 5.5  | 89.3              | 0  | 0               | 0               | 0    | 0    | 0    | 0    | 0                            | 0    |  |
| 41.2                | 0    | 0    | 3.9  | 4.2  | 96.1              | 0  | 0               | 0               | 0    | 0    | 0    | 0    | 0                            | 0    |  |
| 49.2                | 0    | 0    | 0    | 0    | 1.5               | 0  | 98.5            | 2.5             | 0    | 0    | 0    | 0    | 0                            | 0    |  |
| 57.1                | 0    | 0    | 0    | 0    | 8.3               | 0  | 91.7            | 10.2            | 0    | 0    | 0    | 0    | 0                            | 0    |  |
| 65.1                | 0    | 0    | 0    | 0    | 1.6               | 0  | 98.4            | 2.7             | 0    | 0    | 0    | 0    | 0                            | 0    |  |
| 76.1                | 0    | 0    | 0    | 0    | 2.8               | 0  | 97.2            | 4.8             | 0    | 0    | 0    | 0    | 0                            | 0    |  |
| 87.1                | 0    | 0    | 0    | 0    | 0                 | 0  | 100             | 0               | 0    | 0    | 0    | 0    | 0                            | 0    |  |
| 96.1                | 0    | 0    | 0    | 0    | 0                 | 0  | 100             | 0               | 0    | 0    | 0    | 0    | 0                            | 0    |  |
| 110.1               | 0    | 0    | 0    | 0    | 0                 | 0  | 100             | 0               | 0    | 0    | 0    | 0    | 0                            | 0    |  |
| 121                 | 0    | 0    | 0    | 0    | 0                 | 0  | 62.5            | 41.5            | 0    | 0    | 0    | 0    | 0                            | 0    |  |
| 141.1               | 0    | 0    | 0    | 0    | 0                 | 0  | 6.3             | 10.8            | 37.5 | 41.5 | 0    | 0    | 0                            | 0    |  |
| 161.1               | 0    | 0    | 0    | 0    | 0                 | 0  | 0               | 35              | 23.7 | 65   | 3.1  | 5.4  | 0                            | 0    |  |
| 181                 | 0    | 0    | 0    | 0    | 0                 | 0  | 4.2             | 7.2             | 8.3  | 14.4 | 87.5 | 21.7 | 0                            | 0    |  |
| 201                 | 0    | 0    | 0    | 0    | 0                 | 0  | 0               | 0               | 0    | 100  | 0    | 0    | 0                            | 0    |  |
| 221                 | 0    | 0    | 0    | 0    | 0                 | 0  | 0               | 0               | 0    | 100  | 0    | 0    | 0                            | 0    |  |
| 269.1               | 0    | 0    | 0    | 0    | 0                 | 0  | 0               | 1.57 ~ 31.60    | 0    | 100  | 0    | 0    | 0                            | 0    |  |
| 317                 | 0    | 0    | 0    | 0    | 0                 | 0  | 0               | ~ 57.73         | 0    | 100  | 0    | 0    | 0                            | 0    |  |
| 365                 | 0    | 0    | 0    | 0    | 0                 | 0  | 0               | Std. Error      | 0    | 75   | 30.6 | 25   | 30.6                         | 47.1 |  |
| 413                 | 0    | 0    | 0    | 0    | 0                 | 0  | 0               | Std. Error      | 0    | 16.7 | 23.6 | 66.7 | 100                          | 0    |  |
| 461                 | 0    | 0    | 0    | 0    | 0                 | 0  | 0               | Best-fit values | 0    | 0    | 0    | 0    | 100                          | 0    |  |
| 461                 | 0    | 0    | 0    | 0    | 0                 | 0  | 0               | Best-fit values | 0    | 0    | 0    | 0    | 100                          | 0    |  |
| 461                 | 0    | 0    | 0    | 0    | 0                 | 0  | 0               | Best-fit values | 0    | 0    | 0    | 0    | 100                          | 0    |  |
| 461                 | 0    | 0    | 0    | 0    | 0                 | 0  | 0               | Best-fit values | 0    | 0    | 0    | 0    | 100                          | 0    |  |
| 461                 | 0    | 0    | 0    | 0    | 0                 | 0  | 0               | Best-fit values | 0    | 0    | 0    | 0    | 100                          | 0    |  |
| 461                 | 0    | 0    | 0    | 0    | 0                 | 0  | 0               | Best-fit values | 0    | 0    | 0    | 0    | 100                          | 0    |  |
| 461                 | 0    | 0    | 0    | 0    | 0                 | 0  | 0               | Best-fit values | 0    | 0    | 0    | 0    | 100                          | 0    |  |
| 461                 | 0    | 0    | 0    | 0    | 0                 | 0  | 0               | Best-fit values | 0    | 0    | 0    | 0    | 100                          | 0    |  |
| Gaussian            |      |      |      |      |                   |    |                 |                 |      |      |      |      |                              |      |  |
| L1                  | L2   | L3   | L3m  | P    | Modified Gaussian |    |                 |                 |      |      |      |      |                              |      |  |
|                     |      |      |      |      | L1                |    | L2              |                 | L3   |      | P    |      | Cumulative Gaussian          |      |  |
|                     |      |      |      |      | Ambiguous         |    | Best-fit values |                 | L3m  |      | A    |      | Reversed Cumulative Gaussian |      |  |
|                     |      |      |      |      |                   |    |                 |                 |      |      |      |      |                              |      |  |
|                     |      |      |      |      |                   |    |                 |                 |      |      |      |      |                              |      |  |
|                     |      |      |      |      |                   |    |                 |                 |      |      |      |      |                              |      |  |
|                     |      |      |      |      |                   |    |                 |                 |      |      |      |      |                              |      |  |
|                     |      |      |      |      |                   |    |                 |                 |      |      |      |      |                              |      |  |
|                     |      |      |      |      |                   |    |                 |                 |      |      |      |      |                              |      |  |
|                     |      |      |      |      |                   |    |                 |                 |      |      |      |      |                              |      |  |
|                     |      |      |      |      |                   |    |                 |                 |      |      |      |      |                              |      |  |
|                     |      |      |      |      |                   |    |                 |                 |      |      |      |      |                              |      |  |
|                     |      |      |      |      |                   |    |                 |                 |      |      |      |      |                              |      |  |
|                     |      |      |      |      |                   |    |                 |                 |      |      |      |      |                              |      |  |
|                     |      |      |      |      |                   |    |                 |                 |      |      |      |      |                              |      |  |
|                     |      |      |      |      |                   |    |                 |                 |      |      |      |      |                              |      |  |
|                     |      |      |      |      |                   |    |                 |                 |      |      |      |      |                              |      |  |
|                     |      |      |      |      |                   |    |                 |                 |      |      |      |      |                              |      |  |
|                     |      |      |      |      |                   |    |                 |                 |      |      |      |      |                              |      |  |
|                     |      |      |      |      |                   |    |                 |                 |      |      |      |      |                              |      |  |
|                     |      |      |      |      |                   |    |                 |                 |      |      |      |      |                              |      |  |
|                     |      |      |      |      |                   |    |                 |                 |      |      |      |      |                              |      |  |
|                     |      |      |      |      |                   |    |                 |                 |      |      |      |      |                              |      |  |
|                     |      |      |      |      |                   |    |                 |                 |      |      |      |      |                              |      |  |
|                     |      |      |      |      |                   |    |                 |                 |      |      |      |      |                              |      |  |
|                     |      |      |      |      |                   |    |                 |                 |      |      |      |      |                              |      |  |
|                     |      |      |      |      |                   |    |                 |                 |      |      |      |      |                              |      |  |
|                     |      |      |      |      |                   |    |                 |                 |      |      |      |      |                              |      |  |
|                     |      |      |      |      |                   |    |                 |                 |      |      |      |      |                              |      |  |
|                     |      |      |      |      |                   |    |                 |                 |      |      |      |      |                              |      |  |
|                     |      |      |      |      |                   |    |                 |                 |      |      |      |      |                              |      |  |
|                     |      |      |      |      |                   |    |                 |                 |      |      |      |      |                              |      |  |
|                     |      |      |      |      |                   |    |                 |                 |      |      |      |      |                              |      |  |
|                     |      |      |      |      |                   |    |                 |                 |      |      |      |      |                              |      |  |
|                     |      |      |      |      |                   |    |                 |                 |      |      |      |      |                              |      |  |
|                     |      |      |      |      |                   |    |                 |                 |      |      |      |      |                              |      |  |
|                     |      |      |      |      |                   |    |                 |                 |      |      |      |      |                              |      |  |
|                     |      |      |      |      |                   |    |                 |                 |      |      |      |      |                              |      |  |
|                     |      |      |      |      |                   |    |                 |                 |      |      |      |      |                              |      |  |
|                     |      |      |      |      |                   |    |                 |                 |      |      |      |      |                              |      |  |
|                     |      |      |      |      |                   |    |                 |                 |      |      |      |      |                              |      |  |
|                     |      |      |      |      |                   |    |                 |                 |      |      |      |      |                              |      |  |
|                     |      |      |      |      |                   |    |                 |                 |      |      |      |      |                              |      |  |

### Supplementary Materials S3

Datasets and statistical analysis summary of *Lucilia sericata* nonlinear regressions for 50% stage transition by temperature. Regression equation:

$$y = 100/(1+10^{((\text{LogEC50}-x)*\text{HillSlope}))}$$

where x = time (log time) and y = percent in stage. Where “interrupted” is indicated on a regression, data were insufficient to fit a curve (typically this means we obtained too few points in measuring portions of the transition curve). Where “ambiguous” is indicated on a regression, the program could not reach a final solution by iterative (numerical) methods.. The analysis is from GraphPad Prism 6.0 which uses the Marquardt and Levenberg approach for non-linear regression.

*L. sericata* 10° C.

| L. sericata 10.0° C                                    |                 | Dataset                                                                  |                 |       |                 |                 |  |  |
|--------------------------------------------------------|-----------------|--------------------------------------------------------------------------|-----------------|-------|-----------------|-----------------|--|--|
| log(agonist) vs. normalized response -- Variable slope |                 | * starred and italicized data points were excluded from final regression |                 |       |                 |                 |  |  |
|                                                        | L1              | L2                                                                       | L3f             | L3m   | P               | A               |  |  |
| Best-fit values                                        |                 |                                                                          |                 |       |                 |                 |  |  |
| LogEC50                                                | 2.19            | 2.501                                                                    | 2.655           | 2.835 | 3.14            | 3.58            |  |  |
| HillSlope                                              | 2.414           | 4.076                                                                    | 5.869           | 214.8 | 6.86            | 9.414           |  |  |
| EC50                                                   | 155             | 317.3                                                                    | 451.5           | 683.8 | 1380            | 3798            |  |  |
| Std. Error                                             |                 |                                                                          |                 |       |                 |                 |  |  |
| LogEC50                                                | 0.02321         | 0.01958                                                                  | 0.02237         |       | 0.02109         | 0.01581         |  |  |
| HillSlope                                              | 0.3905          | 0.8776                                                                   | 1.748           |       | 2.587           | 3.207           |  |  |
| 95% Confidence Intervals                               |                 |                                                                          |                 |       |                 |                 |  |  |
| LogEC50                                                | 2.126 to 2.255  | 2.454 to 2.549                                                           | 2.605 to 2.705  |       | 3.096 to 3.184  | 3.547 to 3.612  |  |  |
| HillSlope                                              | 1.330 to 3.498  | 1.928 to 6.223                                                           | 1.976 to 9.763  |       | 1.424 to 12.30  | 2.796 to 16.03  |  |  |
| EC50                                                   | 133.7 to 179.8  | 284.2 to 354.3                                                           | 402.6 to 506.4  |       | 1246 to 1528    | 3524 to 4095    |  |  |
| Goodness of Fit                                        |                 |                                                                          |                 |       |                 |                 |  |  |
| Degrees of Freedom                                     | 4               | 6                                                                        | 10              |       | 18              | 24              |  |  |
| R square                                               | 0.9634          | 0.9327                                                                   | 0.8665          |       | 0.6914          | 0.7114          |  |  |
| Absolute Sum of Squares                                | 140.3           | 244.8                                                                    | 1717            |       | 3656            | 3395            |  |  |
| Sy x                                                   | 5.922           | 6.387                                                                    | 13.1            |       | 14.25           | 11.89           |  |  |
| Runs test                                              |                 |                                                                          |                 |       |                 |                 |  |  |
| Points above curve                                     | 3               | 2                                                                        | 3               |       | 2               | 3               |  |  |
| Points below curve                                     | 3               | 6                                                                        | 9               |       | 18              | 23              |  |  |
| Number of runs                                         | 4               | 3                                                                        | 4               |       | 4               | 6               |  |  |
| P value (runs test)                                    | 0.7             | 0.2857                                                                   | 0.2             |       | 0.2842          | 0.4077          |  |  |
| Deviation from Model                                   | Not Significant | Not Significant                                                          | Not Significant |       | Not Significant | Not Significant |  |  |
| Number of points analyzed                              | 6               | 8                                                                        | 12              | 15    | 20              | 26              |  |  |
| LogEC50                                                |                 |                                                                          |                 |       |                 |                 |  |  |
|                                                        | Value           | SE                                                                       | Value           | SE    | Value           | SE              |  |  |
| L1                                                     | 2.190           | 0.023                                                                    | 2.414           | 0.391 | 155.047         |                 |  |  |
| L2                                                     | 2.501           | 0.020                                                                    | 4.076           | 0.878 | 317.305         |                 |  |  |
| L3f                                                    | 2.655           | 0.022                                                                    | 5.869           | 1.748 | 451.532         |                 |  |  |
| L3m                                                    | 2.835           |                                                                          | 214.846         |       | 683.849         |                 |  |  |
| P                                                      | 3.140           | 0.021                                                                    | 6.860           | 2.587 | 1380.160        |                 |  |  |
| A                                                      | 3.580           | 0.016                                                                    | 9.414           | 3.207 | 3798.426        |                 |  |  |

*L. sericata* 12.5° C.

| L. sericata 12.5° C                                    |                          |                 |                            |                 |                 |             | Dataset                                                                  |       |      |     |     |   |   |
|--------------------------------------------------------|--------------------------|-----------------|----------------------------|-----------------|-----------------|-------------|--------------------------------------------------------------------------|-------|------|-----|-----|---|---|
| log(agonist) vs. normalized response -- Variable slope | L1                       | L2              | L3f                        | L3m             | P               | A           | * starred and italicized data points were excluded from final regression |       |      |     |     |   |   |
|                                                        | L1                       | L2              | L3f                        | L3m             | P               | A           | log(time)                                                                | L1    | L2   | L3f | L3m | P | A |
|                                                        | Best-fit values          |                 |                            |                 |                 |             |                                                                          |       |      |     |     |   |   |
| LogEC50                                                | 1.51                     | 2.134           | 2.363 ~ 2.635              | 3.295           | 3.461           | 3.461       | 1.042871                                                                 | 0     | 0    | 0   | 0   | 0 | 0 |
| HillSlope                                              | 2.42                     | 4.088           | 8.158 ~ 182.5              | 6.14            | 35.54           | 35.54       | 1.664916                                                                 | 77.9  | 0    | 0   | 0   | 0 | 0 |
| EC50                                                   | 32.35                    | 136.1           | 230.5 ~ 431.3              | 1971            | 2891            | 2891        | 1.908999                                                                 | 77.4  | 0    | 0   | 0   | 0 | 0 |
|                                                        | Std. Error               |                 |                            |                 |                 |             |                                                                          |       |      |     |     |   |   |
| LogEC50                                                | 0.1559                   | 0.02671         | 0.01772 ~ 2.490e+006       | 0.004932        | 0.002677        | 0.002677    | 2.179384                                                                 | 37.2  | 0    | 0   | 0   | 0 | 0 |
| HillSlope                                              | 1.574                    | 1.065           | 2.296 ~ 2.273              | 0.4259          | 11.44           | 11.44       | 2.316259                                                                 | 68.8  | 0    | 0   | 0   | 0 | 0 |
|                                                        | 95% Confidence Intervals |                 |                            |                 |                 |             |                                                                          |       |      |     |     |   |   |
| LogEC50                                                | -0.4711 to 3.491         | 2.060 to 2.208  | 2.321 to 2.405 (Very wide) | 3.284 to 3.305  | 3.456 to 3.467  | 3.467       | 2.42019                                                                  | 72.5  | 0    | 0   | 0   | 0 | 0 |
| HillSlope                                              | -17.58 to 22.42          | 1.132 to 7.045  | 2.727 to 13.59 (Very wide) | 5.241 to 7.039  | 11.92 to 59.16  | 59.16       | 2.574147                                                                 | 93.8  | 0    | 0   | 0   | 0 | 0 |
| EC50                                                   | 0.3380 to 3096           | 114.7 to 161.4  | 209.3 to 253.9 (Very wide) | 1924 to 2018    | 2854 to 2928    | 2928        | 2.634565                                                                 | 47.9  | 0    | 0   | 0   | 0 | 0 |
|                                                        | Goodness of Fit          |                 |                            |                 |                 |             |                                                                          |       |      |     |     |   |   |
| Degrees of Freedom                                     | 1                        | 4               | 7                          | 10              | 17              | 24          | 2.770115                                                                 | 100   | 0    | 0   | 0   | 0 | 0 |
| R square                                               | 0.933                    | 0.9443          | 0.9527                     | 1               | 0.9815          | 0.9701      | 2.824825                                                                 | 100   | 0    | 0   | 0   | 0 | 0 |
| Absolute Sum of Squares                                | 269.5                    | 338.8           | 646.4                      | 7.423E-19       | 103.5           | 571.9       | 2.873381                                                                 | 100   | 0    | 0   | 0   | 0 | 0 |
| Sy x                                                   | 16.42                    | 9.203           | 9.609                      | 2.725E-10       | 2.467           | 4.881       | 2.917006                                                                 | 100   | 0    | 0   | 0   | 0 | 0 |
|                                                        | Runs test                |                 |                            |                 |                 |             |                                                                          |       |      |     |     |   |   |
| Points above curve                                     | 1                        | 2               | 1                          | 2               | 3               | 6           | 2.984578                                                                 | 14.0* |      |     |     |   |   |
| Points below curve                                     | 2                        | 4               | 8                          | 9               | 16              | 20          | 3.042969                                                                 | 14.2* |      |     |     |   |   |
| Number of runs                                         | 3                        | 3               | 3                          | 2               | 4               | 4           | 3.094471                                                                 | 3.5   | 0    |     |     |   |   |
| P value (runs test)                                    | 1                        | 0.4             | 1                          | 0.0364          | 0.0815          | 0.0009      | 3.140508                                                                 | 10.3  | 0    |     |     |   |   |
| Deviation from Model                                   | Not Significant          | Not Significant | Not Significant            | Not Significant | Not Significant | Significant | 3.182129                                                                 | 23.3  | 5.4  |     |     |   |   |
|                                                        |                          |                 |                            |                 |                 |             | 3.26861                                                                  | 34.2  | 1.4  |     |     |   |   |
| Number of points                                       |                          |                 |                            |                 |                 |             | 3.340662                                                                 | 69.4  | 16.5 |     |     |   |   |
| Analyzed                                               | 3                        | 6               | 9                          | 12              | 19              | 26          | 3.402433                                                                 | 73.0* | 16.7 |     |     |   |   |
|                                                        |                          |                 |                            |                 |                 |             | 3.456518                                                                 | 39.7  |      |     |     |   |   |
|                                                        |                          |                 |                            |                 |                 |             | 3.504607                                                                 | 100   |      |     |     |   |   |
|                                                        |                          |                 |                            |                 |                 |             | 3.504607                                                                 | 100   |      |     |     |   |   |
|                                                        |                          |                 |                            |                 |                 |             |                                                                          |       |      |     |     |   |   |
| L1                                                     | 1.509841                 | 0.1559078       | 2.419713                   | 1.573807        | 32.34751        |             |                                                                          |       |      |     |     |   |   |
| L2                                                     | 2.13381                  | 0.02671435      | 4.088431                   | 1.064884        | 136.0847        |             |                                                                          |       |      |     |     |   |   |
| L3f                                                    | 2.362672                 | 0.01772014      | 8.158384                   | 2.296432        | 230.5008        |             |                                                                          |       |      |     |     |   |   |
| L3m                                                    | 2.634765                 | 2.49036E-06     | 182.5313                   | 2.273092        | 431.2857        |             |                                                                          |       |      |     |     |   |   |
| P                                                      | 3.294597                 | 0.004932407     | 6.140238                   | 0.4259485       | 1970.594        |             |                                                                          |       |      |     |     |   |   |
| A                                                      | 3.461043                 | 0.002676541     | 35.54379                   | 11.444          | 2890.963        |             |                                                                          |       |      |     |     |   |   |

*L. sericata* 15.0° C.

| L. sericata 15.0° C                                   |                          |                 |                 |                 |                | Dataset |                                                                          |      |    |          |      |      |      |
|-------------------------------------------------------|--------------------------|-----------------|-----------------|-----------------|----------------|---------|--------------------------------------------------------------------------|------|----|----------|------|------|------|
| log(agonist) vs. normalized response – Variable slope | L1                       | L2              | L3f             | L3m             | P              | A       | * stalled and italicized data points were excluded from final regression |      |    |          |      |      |      |
|                                                       | Best-fit values          |                 |                 |                 |                |         | log(time)                                                                | L1   | L2 | L3f      | L3m  | P    | A    |
| LogEC50                                               | 1.713                    | 2.138           | 2.253           | 2.497           | 2.877          | 3.233   | 1.236054                                                                 | 0    | 0  | 0        | 0    | 0    | 0    |
| HillSlope                                             | 9.842                    | 122.8           | 17.59           | 78.1            | 5.488          | 17.9    | 1.533867                                                                 | 0    | 0  | 0        | 0    | 0    | 0    |
| EC50                                                  | 51.66                    | 137.6           | 179.1           | 313.8           | 754            | 1709    | 1.709482                                                                 | 48.2 | 0  | 0        | 0    | 0    | 0    |
|                                                       | Std. Error               |                 |                 |                 |                |         | 1.833864                                                                 | 93.2 | 0  | 0        | 0    | 0    | 0    |
| LogEC50                                               | 0.001607                 | 0.0008488       | 0.0004665       | 0.01293         | 0.008174       |         | 1.98802                                                                  | 100  | 0  | 0        | 0    | 0    | 0    |
| HillSlope                                             | 0.5343                   | 0.4598          | 5.118           | 0.7987          | 4.254          |         | 2.053974                                                                 | 100  | 0  | 0        | 0    | 0    | 0    |
|                                                       | 95% Confidence Intervals |                 |                 |                 |                |         | 2.149553                                                                 |      |    | 95.8     | 0    | 0    | 0    |
| LogEC50                                               | 1.709 to 1.718           | 2.251 to 2.255  | 2.496 to 2.498  | 2.850 to 2.905  | 3.216 to 3.249 |         | 2.228101                                                                 |      |    | 27.1     | 0    | 0    | 0    |
| HillSlope                                             | 8.359 to 11.32           | 16.55 to 18.63  | 67.05 to 89.16  | 3.803 to 7.173  | 9.150 to 26.64 |         | 2.294751                                                                 |      |    | 83.8     | 0    | 0    | 0    |
| EC50                                                  | 51.13 to 52.19           | 178.3 to 179.9  | 313.1 to 314.5  | 708.1 to 802.9  | 1644 to 1776   |         | 2.352303                                                                 |      |    | 100      | 0    | 0    | 0    |
|                                                       | Goodness of Fit          |                 |                 |                 |                |         | 2.421796                                                                 |      |    | 100      | 0    | 0    | 0    |
| Degrees of Freedom                                    | 4                        | 9               | 13              | 17              | 26             |         | 2.481622                                                                 |      |    | 6.3      | 0    | 0    | 0    |
| R square                                              | 0.997                    | 0.997           | 0.998           | 0.9199          | 0.9322         |         | 2.502478                                                                 |      |    | 74.1     | 0    | 0    | 0    |
| Absolute Sum of Squares                               | 3.48                     | 5.88            | 25              | 197.2           | 1642           |         | 2.581053                                                                 |      |    | 100      | 0    | 0    | 0    |
| Sy.x                                                  | 0.9327                   | 0.8083          | 1.387           | 3.406           | 7.947          |         | 2.647473                                                                 |      |    | 95       | 5    | 0    | 0    |
|                                                       | Runs test                |                 |                 |                 |                |         | 2.691148                                                                 |      |    | 0        | 0    | 3    | 0    |
| Points above curve                                    | 3                        | 3               | 2               | 1               | 7              |         | 2.751722                                                                 |      |    | 2.751722 | 16.3 | 0    | 0    |
| Points below curve                                    | 3                        | 8               | 13              | 18              | 21             |         | 2.801432                                                                 |      |    | 38.5     | 0    | 0    | 0    |
| Number of runs                                        | 4                        | 4               | 5               | 3               | 4              |         | 2.847614                                                                 |      |    | 34.3     | 0    | 0    | 0    |
| P value (runs test)                                   | 0.7                      | 0.2364          | 1               | 1               | 0.0002         |         | 2.893302                                                                 |      |    | 5.0*     | 0    | 0    | 0    |
| Deviation from Model                                  | Not Significant          | Not Significant | Not Significant | Not Significant | Significant    |         | 2.974162                                                                 |      |    | 15.1*    | 28.6 | 0    | 0    |
|                                                       |                          |                 |                 |                 |                |         | 3.044899                                                                 |      |    | 34.9*    | 26.6 | 0    | 0    |
| Number of points Analyzed                             | 6                        | 7               | 11              | 15              | 19             | 28      | 3.106384                                                                 |      |    | 56.2*    | 11.2 | 5.3  | 5.3  |
|                                                       |                          |                 |                 |                 |                |         | 3.159286                                                                 |      |    | 64.1*    | 24.6 | 24.6 | 24.6 |
|                                                       |                          |                 |                 |                 |                |         | 3.206861                                                                 |      |    |          | 84.4 | 84.4 | 84.4 |
| L1                                                    | 1.713144                 | 0.001607007     | 9.841871        | 0.5342584       | 51.65881       |         | 3.272534                                                                 |      |    |          | 100  | 100  | 100  |
| L2                                                    | 2.138497                 | 122.8396        | 17.59011        | 0.4598216       | 137.5615       |         | 3.329401                                                                 |      |    |          |      |      |      |
| L3f                                                   | 2.253009                 | 0.000848848     | 17.59011        | 0.4598216       | 179.0644       |         | 3.379864                                                                 |      |    |          |      |      |      |
| L3m                                                   | 2.496633                 | 0.00046653      | 78.10342        | 5.118027        | 313.7855       |         |                                                                          |      |    |          |      |      |      |
| P                                                     | 2.877389                 | 0.0129326       | 5.487879        | 0.7987151       | 754.0303       |         |                                                                          |      |    |          |      |      |      |
| A                                                     | 3.232617                 | 0.008174426     | 17.89533        | 4.253516        | 1708.507       |         |                                                                          |      |    |          |      |      |      |

*L. sericata* 17.5° C.

| <i>L. sericata</i> 17.5° C                            |                          | Dataset         |                 |                 |                 |                 |                                                                         |      |      |      |      |
|-------------------------------------------------------|--------------------------|-----------------|-----------------|-----------------|-----------------|-----------------|-------------------------------------------------------------------------|------|------|------|------|
| log(aopnisi) vs. normalized response – Variable slope | L1                       | L2              | L3f             | L3m             | P               | A               | * stated and italicized data points were excluded from final regression |      |      |      |      |
|                                                       | L1                       | L2              | L3f             | L3m             | P               | A               | log(time)                                                               | L1   | L2   | L3f  | L3m  |
| LogEC50                                               | 1.659                    | 1.932           | 2.135           | 2.375           | 2.514           | 2.881           | 1.081887                                                                | 0    | 0    | 0    | 0    |
| HillSlope                                             | 3.5                      | 30.37           | 28.04           | 18.39           | 13.65           | 15.91           | 1.383217                                                                | 0    | 0    | 0    | 0    |
| EC50                                                  | 45.63                    | 85.43           | 136.6           | 237.2           | 326.4           | 760.8           | 1.588659                                                                | 44.2 | 0    | 0    | 0    |
|                                                       | Std. Error               |                 |                 |                 |                 |                 | 1.684022                                                                | 45.2 | 0    | 0    | 0    |
| LogEC50                                               | 0.03999                  | 0.00945         | 0.001194        | 0.004714        | 0.006797        | 0.001571        | 1.779476                                                                | 0    | 0    | 0    | 0    |
| HillSlope                                             | 1.169                    | 8.3             | 4.781           | 0.3376          | 2.473           | 0.8792          | 1.888176                                                                | 91.2 | 8.8  | 0    | 0    |
|                                                       | 95% Confidence Intervals |                 |                 |                 |                 |                 | 1.99189                                                                 |      | 98.6 | 0    | 0    |
| LogEC50                                               | 1.532 to 1.786           | 1.908 to 1.955  | 2.133 to 2.138  | 2.374 to 2.376  | 2.499 to 2.528  | 2.878 to 2.884  | 2.068371                                                                |      | 93.8 | 6.3  | 0    |
| HillSlope                                             | -0.2189 to 7.219         | 10.06 to 50.68  | 17.22 to 38.85  | 17.66 to 19.12  | 8.433 to 18.87  | 14.09 to 17.72  | 2.133832                                                                |      | 46.9 | 0    | 0    |
| EC50                                                  | 34.04 to 61.16           | 81.00 to 90.10  | 135.7 to 137.4  | 236.7 to 237.8  | 315.8 to 337.3  | 755.1 to 766.5  | 2.190588                                                                |      | 100  | 0    | 0    |
|                                                       | Goodness of Fit          |                 |                 |                 |                 |                 | 2.257878                                                                |      | 100  | 0    | 0    |
| Degrees of Freedom                                    | 3                        | 6               | 9               | 13              | 17              | 24              | 2.316198                                                                |      |      | 6.3  | 0    |
| R square                                              | 0.9333                   | 0.9972          | 0.998           | 0.9997          | 0.9991          | 0.9981          | 2.36748                                                                 |      |      | 42.9 | 0    |
| Absolute Sum of Squares                               | 386.3                    | 38.36           | 32.9            | 4.36            | 660.4           | 60.32           | 2.413481                                                                |      |      | 82.5 | 0    |
| Sy.x                                                  | 11.35                    | 2.528           | 1.912           | 0.5791          | 6.233           | 1.585           | 2.4552                                                                  |      |      | 97.2 | 0    |
|                                                       | Runs test                |                 |                 |                 |                 |                 | 2.522575                                                                |      |      |      | 69.6 |
| Points above curve                                    | 2                        | 1               | 3               | 2               | 1               | 3               | 2.581034                                                                |      |      |      | 73.6 |
| Points below curve                                    | 3                        | 7               | 8               | 13              | 18              | 23              | 2.632525                                                                |      |      |      | 93.8 |
| Number of runs                                        | 4                        | 3               | 4               | 4               | 3               | 6               | 2.67859                                                                 |      |      |      | 89.3 |
| P value (runs test)                                   | 0.9                      | 1               | 0.2364          | 0.3714          | 1               | 0.4077          | 2.720221                                                                |      |      |      | 0    |
| Deviation from Model                                  | Not Significant          | Not Significant | Not Significant | Not Significant | Not Significant | Not Significant | 2.802805                                                                |      |      |      | 0    |
|                                                       |                          |                 |                 |                 |                 |                 | 2.872212                                                                |      |      |      | 44.3 |
| Number of points Analyzed                             | 5                        | 8               | 11              | 15              | 19              | 26              | 2.931958                                                                |      |      |      | 83.3 |
|                                                       |                          |                 |                 |                 |                 |                 | 2.98455                                                                 |      |      |      | 100  |
|                                                       |                          |                 |                 |                 |                 |                 | 3.031408                                                                |      |      |      | 96.4 |
|                                                       |                          |                 |                 |                 |                 |                 | 3.103176                                                                |      |      |      | 100  |
| L1                                                    | Value                    | SE              | Value           | SE              | Value           | SE              |                                                                         |      |      |      |      |
| L2                                                    | 1.65922                  | 0.03998688      | 3.499854        | 1.168679        | 45.62676        |                 |                                                                         |      |      |      |      |
| L3f                                                   | 1.931607                 | 0.009449857     | 30.36921        | 8.300381        | 85.42932        |                 |                                                                         |      |      |      |      |
| L3m                                                   | 2.135411                 | 0.001194284     | 28.03586        | 4.781146        | 136.5873        |                 |                                                                         |      |      |      |      |
| P                                                     | 2.375128                 | 0.000471389     | 18.39026        | 0.3376454       | 237.2071        |                 |                                                                         |      |      |      |      |
| A                                                     | 2.513714                 | 0.006797008     | 13.65121        | 2.473212        | 326.373         |                 |                                                                         |      |      |      |      |
|                                                       | 2.881255                 | 0.001571311     | 15.90591        | 0.879162        | 760.7725        |                 |                                                                         |      |      |      |      |



*L. sericata* 20.0° C.

| L. sericata 20.0° C                                   |                 |             |                 |                 |               |                 | Dataset                                                                  |           |      |      |      |      |      |   |
|-------------------------------------------------------|-----------------|-------------|-----------------|-----------------|---------------|-----------------|--------------------------------------------------------------------------|-----------|------|------|------|------|------|---|
| log(agonist) vs. normalized response – Variable slope |                 |             |                 |                 |               |                 | * starred and italicized data points were excluded from final regression |           |      |      |      |      |      |   |
|                                                       | L1              | Interrupted | Best-fit values |                 |               | P               | A                                                                        | log(time) | L1   | L2   | L3f  | L3m  | P    | A |
|                                                       |                 |             | Interrupted     | L2              | L3f           | L3m             |                                                                          |           |      |      |      |      |      |   |
| LogEC50                                               | 1.447           | 1.763       | 1.964           | 2.277           | 2.336 ~ 2.743 |                 | 0.956649                                                                 | 0         | 0    | 0    | 0    | 0    | 0    | 0 |
| HiISlope                                              | 33.46           | 98.41       | 36.98           | 75.89           | 215.3 ~ 127.2 |                 | 1.257278                                                                 | 0         | 0    | 0    | 0    | 0    | 0    | 0 |
| EC50                                                  | 28.01           | 57.92       | 92.11           | 189.3           | 217 ~ 553.4   |                 | 1.435367                                                                 | 28.6      | 0    | 0    | 0    | 0    | 0    | 0 |
|                                                       | Std. Error      |             |                 |                 |               |                 | 1.557607                                                                 | 0         | 0    | 0    | 0    | 0    | 0    | 0 |
| LogEC50                                               |                 |             | 0.00001851      | 0.0207          | ~ 259.2       |                 | 1.655018                                                                 |           |      |      |      |      |      |   |
| HiISlope                                              |                 |             | 0.0264          | 120.9           | ~ 4.395e+006  |                 | 1.771434                                                                 |           | 87.5 | 0    | 0    | 0    | 0    | 0 |
| 95% Confidence Intervals                              |                 |             |                 |                 |               |                 | 1.864783                                                                 |           | 100  | 0    | 0    | 0    | 0    | 0 |
| LogEC50                                               |                 |             | 1.964 to 1.964  | 2.232 to 2.322  | (Very wide)   |                 | 1.940122                                                                 |           |      | 11.3 | 0    | 0    | 0    | 0 |
| HiISlope                                              |                 |             | 36.92 to 37.04  | -185.3 to 337.1 | (Very wide)   |                 | 2.004751                                                                 |           |      | 96.9 | 0    | 0    | 0    | 0 |
| EC50                                                  |                 |             | 92.10 to 92.12  | 170.8 to 209.8  | (Very wide)   |                 | 2.060934                                                                 |           |      | 100  | 0    | 0    | 0    | 0 |
|                                                       | Goodness of Fit |             |                 |                 |               |                 | 2.130602                                                                 |           |      | 100  | 0    | 0    | 0    | 0 |
| Degrees of Freedom                                    |                 |             | 9               | 13              |               | 23              | 2.190495                                                                 |           |      |      | 0    | 0    | 0    | 0 |
| R square                                              |                 |             | 1               | 0.9886          |               | 0.9986          | 2.243172                                                                 |           |      |      | 0    | 0    | 0    | 0 |
| Absolute Sum of Squares                               |                 |             | 0.00115         | 156.2           |               | 13.69           | 2.290035                                                                 |           |      |      | 90.6 | 0    | 0    | 0 |
| Sv x                                                  |                 |             | 0.01131         | 3.466           |               | 0.7715          | 2.32472                                                                  |           |      |      | 87.5 | 12.5 | 0    | 0 |
|                                                       | Runs test       |             |                 |                 |               |                 | 2.399703                                                                 |           |      |      | 100  | 0    | 0    | 0 |
| Points above curve                                    |                 |             | 3               | 1               |               | 2               | 2.457882                                                                 |           |      |      |      | 100  | 0    | 0 |
| Points below curve                                    |                 |             | 8               | 14              |               | 22              | 2.509225                                                                 |           |      |      |      |      | 0    | 0 |
| Number of runs                                        |                 |             | 4               | 3               |               | 3               | 2.555094                                                                 |           |      |      |      |      | 0    | 0 |
| P value (runs test)                                   |                 |             | 0.2364          | 1               |               | 0.087           | 2.596597                                                                 |           |      |      |      |      | 0    | 0 |
| Deviation from Model                                  |                 |             | Not Significant | Not Significant |               | Not Significant | 2.680336                                                                 |           |      |      |      |      | 0    | 0 |
|                                                       |                 |             |                 |                 |               |                 | 2.750508                                                                 |           |      |      |      |      | 90   | 0 |
| Number of points                                      |                 |             |                 |                 |               |                 | 2.810904                                                                 |           |      |      |      |      | 100  | 0 |
| Analyzed                                              | 3               | 7           | 11              | 15              | 17            | 25              | 2.863917                                                                 |           |      |      |      |      | 96.3 | 0 |
|                                                       | LogEC50         |             |                 |                 |               |                 | 2.911158                                                                 |           |      |      |      |      | 100  | 0 |
|                                                       | Value           |             | SE              |                 | HiISlope      |                 | Value                                                                    |           | SE   |      |      |      |      |   |
| L1                                                    | 1.447243        |             | 33.45631        |                 | 28.00549      |                 |                                                                          |           |      |      |      |      |      |   |
| L2                                                    | 1.762846        |             | 98.41061        |                 | 57.92239      |                 |                                                                          |           |      |      |      |      |      |   |
| L3f                                                   | 1.964321        |             | 36.97882        |                 | 0.02640347    |                 |                                                                          |           |      |      |      |      |      |   |
| L3m                                                   | 2.277081        |             | 75.88952        |                 | 120.9227      |                 |                                                                          |           |      |      |      |      |      |   |
| P                                                     | 2.336397        |             | 215.3207        |                 | 216.9686      |                 |                                                                          |           |      |      |      |      |      |   |
| A                                                     | 2.743006        |             | 259.2079        |                 | 4394835       |                 |                                                                          |           |      |      |      |      |      |   |

*L. sericata* 22.5 C.

| L. sericata 22.5° C                                   |                 |             |                 |                 |                 | Dataset                                                                  |          |      |      |     |      |     |
|-------------------------------------------------------|-----------------|-------------|-----------------|-----------------|-----------------|--------------------------------------------------------------------------|----------|------|------|-----|------|-----|
| Log(agonist) vs. normalized response – Variable slope |                 |             |                 |                 |                 | * started and italicized data points were excluded from final regression |          |      |      |     |      |     |
| L1                                                    | L2              | L3f         | L3m             | P               | A               | log(time)                                                                | L1       | L2   | L3f  | L3m | P    | A   |
| Best-fit values                                       |                 |             |                 |                 |                 | 0.848446                                                                 | 0        | 0    | 0    | 0   | 0    | 0   |
| LogEC50                                               | 1.345           | 1.66        | 1.889           | 2.15            | 2.306           | 2.628                                                                    |          |      |      |     |      |     |
| HillSlope                                             | 13.31           | 104.31      | 30.03           | 12.03           | 26.05           | 77.39                                                                    | 1.151906 | 5    | 0    | 0   | 0    | 0   |
| EC50                                                  | 22.13           | 45.74       | 77.51           | 141.1           | 202.4           | 424.6                                                                    | 1.325652 | 35.4 | 0    | 0   | 0    | 0   |
| Std. Error                                            |                 |             |                 |                 |                 | 1.459313                                                                 | 97.5     | 0    | 0    | 0   | 0    | 0   |
| LogEC50                                               | 0.00957         |             | 0.001529        | 0.006895        | 0.0002226       | 0.2165                                                                   | 1.545256 | 91.7 | 0    | 0   | 0    | 0   |
| HillSlope                                             | 5.194           |             | 4.503           | 2.114           | 0.4109          | 884                                                                      | 1.664093 |      | 71.4 | 0   | 0    | 0   |
| 95% Confidence Intervals                              |                 |             |                 |                 |                 |                                                                          | 1.758953 |      | 100  | 0   | 0    | 0   |
| LogEC50                                               | 1.313 to 1.377  |             | 1.886 to 1.893  | 2.135 to 2.165  | 2.306 to 2.307  | 2.180 to 3.076                                                           | 1.832961 |      | 100  | 0   | 0    | 0   |
| HillSlope                                             | -3.220 to 29.84 |             | 20.00 to 40.07  | 7.465 to 16.60  | 25.18 to 26.91  | -1752 to 1906                                                            | 1.897902 |      | 64.7 | 0   | 0    | 0   |
| EC50                                                  | 20.57 to 23.81  |             | 76.91 to 78.12  | 136.4 to 146.1  | 202.2 to 202.6  | 151.3 to 191                                                             | 1.954665 |      | 94.8 | 0   | 0    | 0   |
| Goodness of Fit                                       |                 |             |                 |                 |                 | 2.025562                                                                 | 100      | 0    | 0    | 0   | 0    | 0   |
| Degrees of Freedom                                    | 3               |             | 10              | 13              | 17              | 23                                                                       | 2.086745 |      | 100  | 0   | 0    | 0   |
| R square                                              | 0.9897          |             | 0.9901          | 0.9532          | 0.9999          | 0.9985                                                                   | 2.140167 |      | 59.4 | 0   | 0    | 0   |
| Absolute Sum of Squares                               | 89.51           |             | 21.02           | 573             | 1.302           | 48.89                                                                    | 2.180206 |      | 86.7 | 0   | 0    | 0   |
| Sy.x                                                  | 5.462           |             | 1.45            | 6.639           | 0.2768          | 1.458                                                                    | 2.230609 |      | 85   | 0   | 0    | 0   |
| Runs test                                             |                 |             |                 |                 |                 | 2.296894                                                                 |          |      |      |     | 36.5 | 0   |
| Points above curve                                    | 2               |             | 3               | 1               | 3               | 2                                                                        | 2.354229 |      |      |     | 94.4 | 0   |
| Points below curve                                    | 3               |             | 9               | 14              | 16              | 23                                                                       | 2.404834 |      |      |     | 100  | 0   |
| Number of runs                                        | 5               |             | 4               | 3               | 4               | 4                                                                        | 2.450275 |      |      |     | 100  | 0   |
| P value (runs test)                                   | 1               |             | 0.2             | 1               | 0.0815          | 0.23                                                                     | 2.491385 |      |      |     |      | 0   |
| Deviation from Model                                  | Not Significant |             | Not Significant | Not Significant | Not Significant | Not Significant                                                          | 2.578341 |      |      |     |      | 0   |
| Number of points Analyzed                             | 5               | 8           | 12              | 15              | 19              | 25                                                                       | 2.646894 |      |      |     | 96.7 | 98  |
|                                                       |                 |             |                 |                 |                 |                                                                          | 2.708421 |      |      |     | 93.3 | 100 |
|                                                       |                 |             |                 |                 |                 |                                                                          | 2.761928 |      |      |     |      |     |
|                                                       |                 |             |                 |                 |                 |                                                                          | 2.813581 |      |      |     |      |     |
| L1                                                    | Value           | SE          | HillSlope       | Value           | SE              |                                                                          |          |      |      |     |      |     |
| L2                                                    | 1.34501         | 0.009957033 | 13.30862        | 5.194256        | 22.13144        |                                                                          |          |      |      |     |      |     |
| L3f                                                   | 1.6603          |             | 104.7518        |                 | 45.7404         |                                                                          |          |      |      |     |      |     |
| L3m                                                   | 1.889368        | 0.001528542 | 30.03393        | 4.502685        | 77.51189        |                                                                          |          |      |      |     |      |     |
| P                                                     | 2.149634        | 0.006894524 | 12.03136        | 2.113842        | 141.1347        |                                                                          |          |      |      |     |      |     |
|                                                       | 2.306204        | 0.000222566 | 26.04704        | 0.4108769       | 202.397         |                                                                          |          |      |      |     |      |     |
|                                                       | 2.62794         | 0.2165114   | 77.39233        | 884.0189        | 424.5608        |                                                                          |          |      |      |     |      |     |

*L. sericata* 25.0° C.

| L. sericata 25.0° C                                   |                 | Dataset         |                 |                 |                 |                 |          |           |                                                                          |      |     |   |   |
|-------------------------------------------------------|-----------------|-----------------|-----------------|-----------------|-----------------|-----------------|----------|-----------|--------------------------------------------------------------------------|------|-----|---|---|
| log(agonist) vs. normalized response – Variable slope |                 | L1              | Interrupted     |                 | L3f             | L3m             | P        | A         | * starred and italicized data points were excluded from final regression |      |     |   |   |
|                                                       |                 | Best-fit values |                 |                 |                 |                 |          | log(time) |                                                                          |      |     |   |   |
|                                                       |                 | L1              | L2              | L3f             | L3m             | P               | A        | L1        | L2                                                                       | L3f  | L3m | P | A |
| LogEC50                                               |                 | 1.228           | 1.585           | 1.794           | 2.047           | 2.225           | 2.568    | 0.785626  | 0                                                                        | 0    | 0   | 0 | 0 |
| HillSlope                                             |                 | 11.19           | 102             | 20.2            | 60.17           | 20.13           | 25.89    | 1.083882  | 0                                                                        | 0    | 0   | 0 | 0 |
| EC50                                                  |                 | 16.92           | 38.44           | 62.3            | 111.3           | 167.8           | 370.2    | 1.26156   | 70.7                                                                     | 0    | 0   | 0 | 0 |
|                                                       | Std. Error      |                 |                 |                 |                 |                 |          | 1.383666  | 94.8                                                                     | 0    | 0   | 0 | 0 |
| LogEC50                                               |                 | 0.0144          | 0.0007994       | 0.003992        | 0.001102        | 0.001036        | 0.001036 | 1.479167  | 93.4                                                                     | 0    | 0   | 0 | 0 |
| HillSlope                                             |                 | 4.173           | 0.5171          | 22.69           | 1.094           | 3.598           | 1.593101 | 1.683947  | 87.5                                                                     | 0    | 0   | 0 | 0 |
| 95% Confidence Intervals                              |                 |                 |                 |                 |                 |                 |          | 100       | 0                                                                        | 0    | 0   | 0 | 0 |
| LogEC50                                               |                 | 1.183 to 1.274  | 1.793 to 1.796  | 2.038 to 2.055  | 2.222 to 2.227  | 2.566 to 2.571  | 1.756826 |           |                                                                          | 15.2 | 0   | 0 | 0 |
| HillSlope                                             |                 | -2.088 to 24.47 | 19.03 to 21.37  | 10.72 to 109.6  | 17.82 to 22.44  | 18.45 to 33.34  | 1.820119 |           |                                                                          | 76.2 | 0   | 0 | 0 |
| EC50                                                  |                 | 15.23 to 18.81  | 62.04 to 62.56  | 109.1 to 113.6  | 166.9 to 168.7  | 368.3 to 372.0  | 1.875592 |           |                                                                          | 100  | 0   | 0 | 0 |
|                                                       | Goodness of Fit |                 |                 |                 |                 |                 |          | 1.944996  |                                                                          | 100  | 0   | 0 | 0 |
| Degrees of Freedom                                    |                 | 3               | 9               | 12              | 17              | 23              | 2.004518 |           |                                                                          | 0    | 0   | 0 | 0 |
| R square                                              |                 | 0.9937          | 0.9997          | 0.9994          | 0.9988          | 0.9981          | 2.057206 |           |                                                                          | 81.2 | 0   | 0 | 0 |
| Absolute Sum of Squares                               |                 | 58.91           | 5.836           | 7.735           | 27.88           | 49.69           | 2.104259 |           |                                                                          | 97.2 | 0   | 0 | 0 |
| SV x                                                  |                 | 4.431           | 0.8053          | 0.8028          | 1.281           | 1.47            | 2.146967 |           |                                                                          | 0    | 0   | 0 | 0 |
|                                                       | Runs test       |                 |                 |                 |                 |                 |          | 2.215571  |                                                                          | 40.1 | 0   | 0 | 0 |
| Points above curve                                    |                 | 1               | 3               | 1               | 2               | 2               | 2.274341 |           |                                                                          | 90.8 | 0   | 0 | 0 |
| Points below curve                                    |                 | 4               | 8               | 13              | 17              | 23              | 2.326583 |           |                                                                          | 94.6 | 0   | 0 | 0 |
| Number of runs                                        |                 | 3               | 4               | 3               | 4               | 4               | 2.372912 |           |                                                                          | 100  | 0   | 0 | 0 |
| P value (runs test)                                   |                 | 1               | 0.2364          | 1               | 0.2982          | 0.23            | 2.414973 |           |                                                                          | 0    | 0   | 0 | 0 |
| Deviation from Model                                  |                 | Not Significant | 2.499687 |           |                                                                          | 0    | 0   | 0 | 0 |
|                                                       |                 |                 |                 |                 |                 |                 | 2.570543 |           |                                                                          | 53.4 | 0   | 0 | 0 |
| Number of points                                      |                 | 5               | 7               | 11              | 14              | 19              | 2.631461 |           |                                                                          | 96.9 | 0   | 0 | 0 |
| Analyzed                                              |                 |                 |                 |                 |                 | 25              | 2.684845 |           |                                                                          | 93.1 | 0   | 0 | 0 |
|                                                       |                 |                 |                 |                 |                 |                 | 2.732394 |           |                                                                          | 100  | 0   | 0 | 0 |
| L1                                                    |                 | 1.228471        | 0.01440128      | 11.18917        | 4.172692        | 16.9274         |          |           |                                                                          |      |     |   |   |
| L2                                                    |                 | 1.584817        |                 | 102.0207        |                 | 38.44302        |          |           |                                                                          |      |     |   |   |
| L3f                                                   |                 | 1.794457        | 0.00079943      | 20.20193        | 0.5170847       | 62.29551        |          |           |                                                                          |      |     |   |   |
| L3m                                                   |                 | 2.046651        | 0.003991658     | 60.16519        | 22.68968        | 111.3398        |          |           |                                                                          |      |     |   |   |
| P                                                     |                 | 2.224674        | 0.001101964     | 20.12869        | 1.09356         | 167.7542        |          |           |                                                                          |      |     |   |   |
| A                                                     |                 | 2.568397        | 0.001036366     | 25.8913         | 3.598356        | 370.1684        |          |           |                                                                          |      |     |   |   |

*L. sericata* 27.5° C.

| <i>L. sericata</i> 27.5° C                            |                 | Dataset                                                                  |                 |                 |                 |                 |          |      |     |     |   |
|-------------------------------------------------------|-----------------|--------------------------------------------------------------------------|-----------------|-----------------|-----------------|-----------------|----------|------|-----|-----|---|
| log(sigmoid) vs. normalized response – Variable slope |                 | * starred and italicized data points were excluded from final regression |                 |                 |                 |                 |          |      |     |     |   |
| L1                                                    | L2              | L3f                                                                      | L3m             | P               | A               | log(time)       | L1       | L2   | L3f | L3m | P |
| Best-fit values                                       |                 |                                                                          |                 |                 |                 |                 |          |      |     |     |   |
| LogEC50                                               | 1.073           | 1.489                                                                    | 1.667           | 2.094           | 2.197           | 2.537           | 0.704722 | 0    | 0   | 0   | 0 |
| HiISlope                                              | 2.373           | 29.23                                                                    | 74.36           | 22.77           | 23.07           | 14.99           | 1.005931 | 48.9 | 0   | 0   | 0 |
| EC50                                                  | 11.83           | 30.87                                                                    | 46.5            | 124.3           | 157.6           | 344.5           | 1.18327  | 70.1 | 0   | 0   | 0 |
| Std. Error                                            |                 |                                                                          |                 |                 |                 |                 |          |      |     |     |   |
| LogEC50                                               | 0.05188         | 0.0267                                                                   | 0.4354          | 0.001935        | 0.00195         | 0.001775        | 1.400754 | 85.4 | 0   | 0   | 0 |
| HiISlope                                              | 0.6716          | 24.71                                                                    | 1324            | 2.179           | 2.435           | 0.7553          | 1.520975 | 89.3 | 0   | 0   | 0 |
| 95% Confidence Intervals                              |                 |                                                                          |                 |                 |                 |                 |          |      |     |     |   |
| LogEC50                                               | 0.9080 to 1.238 | 1.421 to 1.558                                                           | 0.6635 to 2.672 | 2.090 to 2.099  | 2.193 to 2.202  | 2.533 to 2.541  | 1.691928 | 98.5 | 0   | 0   | 0 |
| HiISlope                                              | 0.2357 to 4.510 | -34.31 to 92.77                                                          | -2980 to 3128   | 18.10 to 27.44  | 17.93 to 28.21  | 13.43 to 16.56  | 1.756699 | 91.7 | 0   | 0   | 0 |
| EC50                                                  | 8.092 to 17.31  | 26.35 to 36.15                                                           | 4.608 to 469.3  | 123.1 to 125.5  | 156.1 to 159.1  | 341.6 to 347.4  | 1.813681 | 98.4 | 0   | 0   | 0 |
| Goodness of Fit                                       |                 |                                                                          |                 |                 |                 |                 | 1.881504 |      |     |     |   |
| Degrees of Freedom                                    | 3               | 5                                                                        | 8               | 14              | 17              | 23              | 1.93981  |      |     |     |   |
| R square                                              | 0.9174          | 0.9988                                                                   | 0.9963          | 0.9932          | 0.9947          | 0.9969          | 1.991595 |      |     |     |   |
| Absolute Sum of Squares                               | 359.6           | 15.11                                                                    | 71.45           | 58.13           | 97.76           | 66.53           | 2.041787 |      |     |     |   |
| Sy x                                                  | 10.95           | 1.738                                                                    | 2.989           | 2.038           | 2.398           | 1.701           | 2.082785 |      |     |     |   |
| Runs test                                             |                 |                                                                          |                 |                 |                 |                 |          |      |     |     |   |
| Points above curve                                    | 2               | 1                                                                        | 1               | 1               | 2               | 3               | 2.149591 |      |     |     |   |
| Points below curve                                    | 3               | 6                                                                        | 9               | 15              | 17              | 22              | 2.207051 |      |     |     |   |
| Number of runs                                        | 3               | 3                                                                        | 3               | 3               | 4               | 4               | 2.257679 |      |     |     |   |
| P value (runs test)                                   | 0.5             | 1                                                                        | 1               | 1               | 0.2982          | 0.0474          | 2.303196 |      |     |     |   |
| Deviation from Model                                  | Not Significant | Not Significant                                                          | Not Significant | Not Significant | Not Significant | Not Significant | 2.344392 |      |     |     |   |
|                                                       |                 |                                                                          |                 |                 |                 |                 | 2.42984  |      |     |     |   |
|                                                       |                 |                                                                          |                 |                 |                 |                 | 2.501059 |      |     |     |   |
| Number of points                                      | 5               | 7                                                                        | 10              | 16              | 19              | 25              | 2.562293 |      |     |     |   |
| Analyzed                                              |                 |                                                                          |                 |                 |                 |                 | 2.61595  |      |     |     |   |
|                                                       |                 |                                                                          |                 |                 |                 |                 | 2.663701 |      |     |     |   |
| Value SE Value SE                                     |                 |                                                                          |                 |                 |                 |                 |          |      |     |     |   |
| L1                                                    | 1.073115        | 0.05187581                                                               | 2.372677        | 0.6715761       | 11.83355        |                 |          |      |     |     |   |
| L2                                                    | 1.489477        | 0.0266954                                                                | 29.23228        | 24.71381        | 30.86573        |                 |          |      |     |     |   |
| L3f                                                   | 1.867488        | 0.4353856                                                                | 74.35593        | 1324.423        | 46.50373        |                 |          |      |     |     |   |
| L3m                                                   | 2.094481        | 0.001934841                                                              | 22.77118        | 2.178688        | 124.3028        |                 |          |      |     |     |   |
| P                                                     | 2.197497        | 0.001950332                                                              | 23.07309        | 2.435186        | 157.5786        |                 |          |      |     |     |   |
| A                                                     | 2.537146        | 0.001775475                                                              | 14.99456        | 0.7553464       | 344.4659        |                 |          |      |     |     |   |

*L. sericata* 30.0° C.

| <i>L. sericata</i> 30.0° C                            |                             | Dataset         |                 |                 |                 |                 |                                                                          |      |    |      |      |
|-------------------------------------------------------|-----------------------------|-----------------|-----------------|-----------------|-----------------|-----------------|--------------------------------------------------------------------------|------|----|------|------|
| log(agonist) vs. normalized response – Variable slope | L1                          | L2              | L3f             | L3m             | P               | A               | * starred and italicized data points were excluded from final regression |      |    |      |      |
|                                                       | Best-fit values             |                 |                 |                 |                 |                 | log(time)                                                                | L1   | L2 | L3f  | A    |
| LogEC50                                               | 1.058 ~ 1.391               |                 | 1.619           | 1.938           | 2.144           | 2.473           | 0.613225                                                                 | 0    | 0  | 0    | 0    |
| HiISlope                                              | 3.885 ~ 360.1               |                 | 14.4            | 67.55           | 16.63           | 32.25           | 0.909801                                                                 | 13.5 | 0  | 0    | 0    |
| EC50                                                  | 11.44 ~ 24.60               |                 | 41.56           | 86.67           | 139.3           | 297.2           | 1.084427                                                                 | 70.3 | 0  | 0    | 0    |
|                                                       | Std. Error                  |                 |                 |                 |                 |                 | 1.183507                                                                 | 62.9 | 0  | 0    | 0    |
| LogEC50                                               | 0.04688 ~                   |                 | 0.002951        | 0.006475        | 0.001078        | 0.004462        | 1.305262                                                                 | 0    | 0  | 0    | 0    |
| HiISlope                                              | 1.806 ~                     |                 | 1.466           | 55.44           | 0.644           | 4.831           | 1.534079                                                                 | 100  | 0  | 0    | 0    |
|                                                       | 95% Confidence Intervals    |                 |                 |                 |                 |                 | 1.615775                                                                 | 100  | 0  | 0    | 0    |
| LogEC50                                               | 0.8566 to 1.260 (Very wide) |                 | 1.612 to 1.625  | 1.924 to 1.952  | 2.142 to 2.146  | 2.464 to 2.482  | 1.615775                                                                 | 50.4 | 0  | 0    | 0    |
| HiISlope                                              | -3.887 to 11.66 (Very wide) |                 | 11.09 to 17.72  | -52.21 to 187.3 | 15.28 to 17.98  | 22.25 to 42.25  | 1.68331                                                                  | 85   | 0  | 0    | 0    |
| EC50                                                  | 7.188 to 18.20 (Very wide)  |                 | 40.93 to 42.21  | 83.93 to 89.51  | 138.5 to 140.0  | 290.9 to 303.6  | 1.741644                                                                 | 100  | 0  | 0    | 0    |
| Goodness of Fit                                       |                             |                 |                 |                 |                 |                 | 1.813803                                                                 | 100  | 0  | 0    | 0    |
| Degrees of Freedom                                    | 2                           | 5               | 9               | 13              | 19              | 23              | 1.87629                                                                  |      |    | 2.6  | 0    |
| R square                                              | 0.8853                      | 1               | 0.9967          | 0.9989          | 0.9992          | 0.985           | 1.930015                                                                 |      |    | 22.7 | 0    |
| Absolute Sum of Squares                               | 424.3                       | 0               | 63.53           | 17.63           | 25.17           | 33.5            | 1.978181                                                                 |      |    | 100  | 0    |
| Sy x                                                  | 14.57                       | 5.942E-30       | 2.657           | 1.165           | 1.151           | 3.808           | 2.004608                                                                 |      |    | 96.7 | 0    |
|                                                       | Runs test                   |                 |                 |                 |                 |                 | 2.089805                                                                 |      |    | 13.5 | 0    |
| Points above curve                                    | 1                           | 1               | 3               | 2               | 3               | 2               | 2.149412                                                                 |      |    | 53.3 | 0    |
| Points below curve                                    | 3                           | 5               | 8               | 13              | 18              | 23              | 2.202159                                                                 |      |    | 93.8 | 0    |
| Number of runs                                        | 3                           | 2               | 4               | 5               | 6               | 4               | 2.247973                                                                 |      |    | 96.8 | 0    |
| P value (runs test)                                   | 1                           | 0.3333          | 0.2364          | 1               | 0.4887          | 0.23            | 2.290035                                                                 |      |    | 96.3 | 0    |
| Deviation from Model                                  | Not Significant             | Not Significant | Not Significant | Not Significant | Not Significant | Not Significant | 2.374809                                                                 |      |    | 100  | 0    |
|                                                       |                             |                 |                 |                 |                 |                 | 2.445804                                                                 |      |    |      | 11.3 |
| Number of points Analyzed                             | 4                           | 7               | 11              | 15              | 21              | 25              | 2.507856                                                                 |      |    |      | 93.8 |
|                                                       |                             |                 |                 |                 |                 |                 | 2.559907                                                                 |      |    |      | 81.6 |
|                                                       |                             |                 |                 |                 |                 |                 | 2.607455                                                                 |      |    |      | 100  |
|                                                       | LogEC50                     |                 |                 |                 |                 |                 |                                                                          |      |    |      |      |
|                                                       | Value                       | SE              | Value           | SE              | Value           | SE              |                                                                          |      |    |      |      |
| L1                                                    | 1.058351                    | 0.04687951      | 3.884845        | 1.806252        | 11.43803        |                 |                                                                          |      |    |      |      |
| L2                                                    | 1.390995                    |                 | 360.1489        |                 | 24.60338        |                 |                                                                          |      |    |      |      |
| L3f                                                   | 1.61869                     | 0.002950681     | 14.40494        | 1.466204        | 41.56142        |                 |                                                                          |      |    |      |      |
| L3m                                                   | 1.937892                    | 0.006474931     | 67.54924        | 55.44376        | 86.67464        |                 |                                                                          |      |    |      |      |
| P                                                     | 2.143842                    | 0.00107768      | 16.62763        | 0.6440066       | 139.2652        |                 |                                                                          |      |    |      |      |
| A                                                     | 2.473039                    | 0.00446208      | 32.24966        | 4.831073        | 297.1835        |                 |                                                                          |      |    |      |      |

*L. sericata* 32.5° C.

| <i>L. sericata</i> 32.5° C                            |                 |              |                 |                 |                 |                 |                                                                          |       |     |
|-------------------------------------------------------|-----------------|--------------|-----------------|-----------------|-----------------|-----------------|--------------------------------------------------------------------------|-------|-----|
| log(agonist) vs. normalized response – Variable slope | L1              | L2           | L3f             | L3m             | P               | A               | * starred and italicized data points were excluded from final regression |       |     |
|                                                       | L1              | L2           | L3f             | L3m             | P               | A               | Dataset                                                                  |       |     |
|                                                       |                 |              |                 |                 |                 |                 | L1                                                                       | L2    | L3f |
|                                                       |                 |              |                 |                 |                 |                 | L3m                                                                      | P     | A   |
| LogEC50                                               | 1.139           | 1.4          | 1.619           | 1.978           | 2.252           | 2.543           | 0.611458                                                                 | 0     | 0   |
| HiISlope                                              | 4.308           | 110.3        | 14.19           | 10.99           | 6.571           | 11.48           | 0.910491                                                                 | 5.8   | 0   |
| EC50                                                  | 13.77           | 25.11        | 41.59           | 95.09           | 178.6           | 349.1           | 1.094442                                                                 | 43.3  | 0   |
|                                                       |                 |              |                 |                 |                 |                 | 1.182795                                                                 | 57.7  | 0   |
| LogEC50                                               | 0.009731        |              | 0.003305        | 0.01157         | 0.008096        | 0.007449        | 1.285932                                                                 | 81.3  | 0   |
| HiISlope                                              | 0.4771          |              | 1.079           | 3.094           | 0.7149          | 2.115           | 1.402046                                                                 | 63.7  | 0   |
|                                                       |                 |              |                 |                 |                 |                 | 1.494039                                                                 | 100   | 0   |
| LogEC50                                               | 1.108 to 1.170  |              | 1.611 to 1.627  | 1.953 to 2.003  | 2.235 to 2.269  | 2.528 to 2.558  | 1.592732                                                                 | 90.0* | 0   |
| HiISlope                                              | 2.789 to 5.828  |              | 11.71 to 16.68  | 4.350 to 17.62  | 5.084 to 8.058  | 7.119 to 15.85  | 1.655178                                                                 | 77.2  | 0   |
| EC50                                                  | 12.82 to 14.79  |              | 40.86 to 42.32  | 89.81 to 100.7  | 171.8 to 185.6  | 337.0 to 361.7  | 1.708633                                                                 | 93.1  | 0   |
| Goodness of Fit                                       |                 |              |                 |                 |                 |                 | 1.779356                                                                 | 100   | 0   |
| Degrees of Freedom                                    | 3               |              | 8               | 14              | 21              | 24              | 1.840603                                                                 |       | 0   |
| R square                                              | 0.9917          |              | 0.9996          | 0.8745          | 0.9719          | 0.9137          | 1.892813                                                                 |       | 0   |
| Absolute Sum of Squares                               | 39.59           |              | 6.807           | 1458            | 575.4           | 996.9           | 1.940641                                                                 |       | 0   |
| Sy x                                                  | 3.633           |              | 0.9224          | 10.2            | 5.235           | 6.445           | 1.983043                                                                 |       | 0   |
|                                                       |                 |              |                 |                 |                 |                 | 2.049735                                                                 |       | 0   |
| Points above curve                                    | 2               |              | 2               | 2               | 3               | 2               | 2.092165                                                                 |       | 0   |
| Points below curve                                    | 3               |              | 8               | 14              | 20              | 24              | 2.158928                                                                 |       | 0   |
| Number of runs                                        | 4               |              | 4               | 4               | 4               | 4               | 2.20438                                                                  |       | 0   |
| P value (runs test)                                   | 0.9             |              | 0.5333          | 0.35            | 0.0559          | 0.2215          | 2.245831                                                                 |       | 0   |
| Deviation from Model                                  | Not Significant |              | Not Significant | Not Significant | Not Significant | Not Significant | 2.328677                                                                 |       | 0   |
|                                                       |                 |              |                 |                 |                 |                 | 2.398099                                                                 |       | 0   |
| Number of points                                      | 5               |              | 10              | 16              | 23              | 26              | 2.439484                                                                 |       | 0   |
| Analyzed                                              |                 |              |                 |                 |                 |                 | 2.495035                                                                 |       | 0   |
|                                                       |                 |              |                 |                 |                 |                 | 2.542825                                                                 |       | 0   |
|                                                       |                 |              |                 |                 |                 |                 | 2.61066                                                                  |       | 0   |
| L1                                                    | 1.139           | 0.009731171  | 4.307749        | 0.4771413       | 13.77211        |                 |                                                                          |       | 100 |
| L2                                                    | 1.399831        |              | 110.2617        |                 | 25.10909        |                 |                                                                          |       |     |
| L3f                                                   | 1.618942        | 0.0030305214 | 14.19396        | 1.079273        | 41.58552        |                 |                                                                          |       |     |
| L3m                                                   | 1.978156        | 0.01156718   | 10.98604        | 3.093692        | 95.09459        |                 |                                                                          |       |     |
| P                                                     | 2.251843        | 0.008095888  | 6.571046        | 0.7148767       | 178.5843        |                 |                                                                          |       |     |
| A                                                     | 2.542994        | 0.007448316  | 11.48417        | 2.114877        | 349.1358        |                 |                                                                          |       |     |

## Supplementary Materials S4

Development data for *Phormia regina* (from Excel).

| Transitions at 50% by Dose Analysis |      |                           |       |       |       |       |        |
|-------------------------------------|------|---------------------------|-------|-------|-------|-------|--------|
| Temp                                |      | Hours to Stage Transition |       |       |       |       |        |
| Mean                                | SE   | E-L1                      | E-L2  | E-L3f | E-L3m | E-P   | E-A    |
| 10.2                                | 0.16 |                           |       |       |       |       |        |
| 12.5                                | 0.13 | 70.2                      | 354.3 | 564.3 | 612.5 | 843.8 | 1451.0 |
| 15.0                                | 0.15 | 61.4                      | 154.1 | 230.7 | 445.9 | 468.6 | 965.9  |
| 17.5                                | 0.09 | 40.0                      | 126.9 | 217.6 | 277.4 | 318.6 | 622.5  |
| 20.0                                | 0.1  | 24.3                      | 74.6  | 122.7 | 202.4 | 244.8 | 447.2  |
| 22.4                                | 0.90 | 15.5                      | 49.8  | 91.6  | 134.0 | 178.3 | 356.1  |
| 25.0                                | 0.08 | 15.2                      | 43.3  | 71.3  | 123.2 | 154.8 | 283.4  |
| 27.5                                | 0.07 | 13.8                      | 33.9  | 56.6  | 95.3  | 122.1 | 239.2  |
| 30.0                                | 0.23 | 10.3                      | 27.3  | 46.6  | 75.6  | 106.7 | 217.8  |
| 32.5                                | 0.07 | 10.1                      | 25.1  | 42.0  | 78.2  | 105.9 | 205.6  |

| Temp |      | Hours in Stage |       |       |       |       |       |
|------|------|----------------|-------|-------|-------|-------|-------|
| Mean | SE   | Egg            | L1    | L2    | L3f   | L3m   | P     |
| 10.2 | 0.16 |                |       |       |       |       |       |
| 12.5 | 0.13 | 70.2           | 284.1 | 210.0 | 48.2  | 231.4 | 607.1 |
| 15.0 | 0.15 | 61.4           | 92.7  | 76.6  | 215.2 | 22.7  | 497.3 |
| 17.5 | 0.09 | 40.0           | 86.9  | 90.7  | 59.8  | 41.2  | 303.9 |
| 20.0 | 0.1  | 24.3           | 50.4  | 48.1  | 79.7  | 42.4  | 202.4 |
| 22.4 | 0.90 | 15.5           | 34.3  | 41.8  | 42.4  | 44.3  | 177.8 |
| 25.0 | 0.08 | 15.2           | 28.2  | 28.0  | 51.9  | 31.6  | 128.6 |
| 27.5 | 0.07 | 13.8           | 20.0  | 22.7  | 38.7  | 26.7  | 117.2 |
| 30.0 | 0.23 | 10.3           | 17.1  | 19.3  | 28.9  | 31.1  | 111.1 |
| 32.5 | 0.07 | 10.1           | 15.1  | 16.9  | 36.2  | 27.7  | 99.7  |

| Temp |      | Days to Stage Transition |      |       |       |      |      |
|------|------|--------------------------|------|-------|-------|------|------|
| Mean | SE   | E-L1                     | E-L2 | E-L3f | E-L3m | E-P  | E-A  |
| 10.2 | 0.16 | 0.0                      |      |       |       |      |      |
| 12.5 | 0.13 | 2.9                      | 14.8 | 23.5  | 25.5  | 35.2 | 60.5 |
| 15.0 | 0.15 | 2.6                      | 6.4  | 9.6   | 18.6  | 19.5 | 40.2 |
| 17.5 | 0.09 | 1.7                      | 5.3  | 9.1   | 11.6  | 13.3 | 25.9 |
| 20.0 | 0.1  | 1.0                      | 3.1  | 5.1   | 8.4   | 10.2 | 18.6 |
| 22.4 | 0.90 | 0.6                      | 2.1  | 3.8   | 5.6   | 7.4  | 14.8 |
| 25.0 | 0.08 | 0.6                      | 1.8  | 3.0   | 5.1   | 6.4  | 11.8 |
| 27.5 | 0.07 | 0.6                      | 1.4  | 2.4   | 4.0   | 5.1  | 10.0 |
| 30.0 | 0.23 | 0.4                      | 1.1  | 1.9   | 3.1   | 4.4  | 9.1  |
| 32.5 | 0.07 | 0.4                      | 1.0  | 1.8   | 3.3   | 4.4  | 8.6  |

| Temp |      |  | Days in Stage |      |     |     |     |      |
|------|------|--|---------------|------|-----|-----|-----|------|
| Mean | SE   |  | Egg           | L1   | L2  | L3f | L3m | P    |
| 10.2 | 0.16 |  | 0.0           |      |     |     |     |      |
| 12.5 | 0.13 |  | 2.9           | 11.8 | 8.7 | 2.0 | 9.6 | 25.3 |
| 15.0 | 0.15 |  | 2.6           | 3.9  | 3.2 | 9.0 | 0.9 | 20.7 |
| 17.5 | 0.09 |  | 1.7           | 3.6  | 3.8 | 2.5 | 1.7 | 12.7 |
| 20.0 | 0.1  |  | 1.0           | 2.1  | 2.0 | 3.3 | 1.8 | 8.4  |
| 22.4 | 0.90 |  | 0.6           | 1.4  | 1.7 | 1.8 | 1.8 | 7.4  |
| 25.0 | 0.08 |  | 0.6           | 1.2  | 1.2 | 2.2 | 1.3 | 5.4  |
| 27.5 | 0.07 |  | 0.6           | 0.8  | 0.9 | 1.6 | 1.1 | 4.9  |
| 30.0 | 0.23 |  | 0.4           | 0.7  | 0.8 | 1.2 | 1.3 | 4.6  |
| 32.5 | 0.07 |  | 0.4           | 0.6  | 0.7 | 1.5 | 1.2 | 4.2  |

| Temp |      |  | 1/Days to Stage Transition |       |       |       |       |       |
|------|------|--|----------------------------|-------|-------|-------|-------|-------|
| Mean | SE   |  | E-L1                       | E-L2  | E-L3f | E-L3m | E-P   | E-A   |
| 10.2 | 0.51 |  |                            |       |       |       |       |       |
| 12.5 | 0.18 |  | 0.342                      | 0.068 | 0.043 | 0.039 | 0.028 | 0.017 |
| 15.0 | 0.14 |  | 0.391                      | 0.156 | 0.104 | 0.054 | 0.051 | 0.025 |
| 17.5 | 0.12 |  | 0.600                      | 0.189 | 0.110 | 0.087 | 0.075 | 0.039 |
| 20.0 | 0.09 |  | 0.989                      | 0.322 | 0.196 | 0.119 | 0.098 | 0.054 |
| 22.4 | 0.10 |  | 1.548                      | 0.482 | 0.262 | 0.179 | 0.135 | 0.067 |
| 25.0 | 0.06 |  | 1.584                      | 0.554 | 0.337 | 0.195 | 0.155 | 0.085 |
| 27.5 | 0.06 |  | 1.738                      | 0.709 | 0.424 | 0.252 | 0.197 | 0.100 |
| 30.0 | 0.05 |  | 2.336                      | 0.878 | 0.515 | 0.318 | 0.225 | 0.110 |
| 32.5 | 0.02 |  | 2.387                      | 0.956 | 0.571 | 0.307 | 0.227 | 0.117 |

| Temp |      |  | 1/Days in Stage |       |       |       |       |       |
|------|------|--|-----------------|-------|-------|-------|-------|-------|
| Mean | SE   |  | Egg             | L1    | L2    | L3f   | L3m   | P     |
| 10.2 | 0.51 |  |                 |       |       |       |       |       |
| 12.5 | 0.18 |  | 0.342           | 0.084 | 0.114 | 0.498 | 0.104 | 0.040 |
| 15.0 | 0.14 |  | 0.391           | 0.259 | 0.313 | 0.112 | 1.058 | 0.048 |
| 17.5 | 0.12 |  | 0.600           | 0.276 | 0.265 | 0.401 | 0.583 | 0.079 |
| 20.0 | 0.09 |  | 0.989           | 0.477 | 0.499 | 0.301 | 0.566 | 0.119 |
| 22.4 | 0.10 |  | 1.548           | 0.699 | 0.574 | 0.566 | 0.542 | 0.135 |
| 25.0 | 0.06 |  | 1.584           | 0.852 | 0.858 | 0.462 | 0.760 | 0.187 |
| 27.5 | 0.06 |  | 1.738           | 1.198 | 1.055 | 0.620 | 0.898 | 0.205 |
| 30.0 | 0.05 |  | 2.336           | 1.406 | 1.245 | 0.829 | 0.771 | 0.216 |
| 32.5 | 0.02 |  | 2.387           | 1.594 | 1.420 | 0.663 | 0.866 | 0.241 |



|                        | Linear Regression Results (from Graph Pad Prism) |      |       |       |      |       |
|------------------------|--------------------------------------------------|------|-------|-------|------|-------|
|                        | 1/Days to Stage Transition                       |      |       |       |      |       |
|                        | E-L1                                             | E-L2 | E-L3f | E-L3m | E-P  | E-A   |
| Dev Min (x-intercept): | 11.5                                             | 12.9 | 12.8  | 11.9  | 10.5 | 10.2  |
| ADD (1/slope):         | 8.4                                              | 20.4 | 34.7  | 62.9  | 91.4 | 181.9 |
| Range min:             | 15.0                                             | 15.0 | 15.0  | 15.0  | 15.0 | 15.0  |
| Range max:             | 32.5                                             | 32.5 | 32.5  | 32.5  | 32.5 | 32.5  |

|                        | 1/Days in Stage |      |      |      |      |      |
|------------------------|-----------------|------|------|------|------|------|
|                        | Egg             | L1   | L2   | L3f  | L3m  | P    |
| Dev Min (x-intercept): | 11.5            | 13.5 | 12.5 | 8.2  | 2.3  | 10.5 |
| ADD (1/slope):         | 8.4             | 12.1 | 14.4 | 29.3 | 30.2 | 84.9 |
| Range min:             | 15.0            | 15.0 | 15.0 | 17.5 | 17.5 | 15.0 |
| Range max:             | 32.5            | 32.5 | 32.5 | 30.0 | 27.5 | 32.5 |

| Comparison of Transition vs. Stage Results |       |          |            |              |  |
|--------------------------------------------|-------|----------|------------|--------------|--|
|                                            | trans | by stage | diff (t-s) | % diff (d/t) |  |
| Egg-L1                                     | 8.4   | 11.5     | -3.1       | -36.8%       |  |
| L1-L2                                      | 20.4  | 25.0     | -4.6       | -22.4%       |  |
| L2-L3f                                     | 34.7  | 39.4     | -4.7       | -13.5%       |  |
| L3f-L3m                                    | 62.9  | 68.7     | -5.8       | -9.3%        |  |
| L3m-P                                      | 91.4  | 98.9     | -7.5       | -8.2%        |  |
| P-A                                        | 181.9 | 183.8    | -1.9       | -1.1%        |  |

| From Prism (Linear Regressions): missing values represent non-linearity |      |                         |      |       |       |      |       |
|-------------------------------------------------------------------------|------|-------------------------|------|-------|-------|------|-------|
| Temp                                                                    |      | Transition ADD by 1/Day |      |       |       |      |       |
| Mean                                                                    | SE   | E-L1                    | E-L2 | E-L3f | E-L3m | E-P  | E-A   |
| 10.2                                                                    | 0.51 |                         |      |       |       |      |       |
| 12.5                                                                    | 0.18 |                         |      |       |       |      |       |
| 15.0                                                                    | 0.14 | 8.9                     | 13.7 | 21.3  | 58.8  | 89.4 | 195.9 |
| 17.5                                                                    | 0.12 | 10.0                    | 24.6 | 42.8  | 65.6  | 94.0 | 191.2 |
| 20.0                                                                    | 0.09 | 8.6                     | 22.2 | 37.0  | 69.0  | 97.8 | 184.1 |
| 22.4                                                                    | 0.10 | 7.0                     | 19.7 | 36.6  | 58.8  | 88.7 | 181.5 |
| 25.0                                                                    | 0.06 | 8.5                     | 21.9 | 36.2  | 67.5  | 93.9 | 175.3 |
| 27.5                                                                    | 0.06 | 9.2                     | 20.6 | 34.6  | 62.1  | 86.7 | 172.8 |
| 30.0                                                                    | 0.05 | 7.9                     | 19.5 | 33.4  | 57.1  | 86.8 | 179.9 |
| 32.5                                                                    | 0.02 | 8.8                     | 20.5 | 34.5  | 67.3  | 97.4 | 191.5 |

| Temp |      | Stage ADD by 1/Days |      |      |      |      |      |
|------|------|---------------------|------|------|------|------|------|
| Mean | SE   | Egg                 | L1   | L2   | L3f  | L3m  | P    |
| 10.2 | 0.51 |                     |      |      |      |      |      |
| 12.5 | 0.18 |                     |      |      |      |      |      |
| 15.0 | 0.14 | 8.9                 | 6.0  | 7.9  | 61.3 | 12.0 | 94.0 |
| 17.5 | 0.12 | 10.0                | 14.7 | 18.9 | 23.3 | 26.2 | 89.2 |
| 20.0 | 0.09 | 8.6                 | 13.8 | 15.0 | 39.3 | 31.4 | 80.5 |
| 22.4 | 0.10 | 7.0                 | 12.7 | 17.2 | 25.1 | 37.1 | 88.2 |
| 25.0 | 0.06 | 8.5                 | 13.5 | 14.5 | 36.4 | 29.9 | 77.8 |
| 27.5 | 0.06 | 9.2                 | 11.7 | 14.2 | 31.2 | 28.1 | 83.0 |
| 30.0 | 0.05 | 7.9                 | 11.7 | 14.0 | 26.3 | 35.9 | 90.2 |
| 32.5 | 0.02 | 8.8                 | 11.9 | 14.1 | 36.7 | 34.9 | 91.5 |

| Temp (mean)    | Transition ADD by 1/Day |       |       |       |       |       |
|----------------|-------------------------|-------|-------|-------|-------|-------|
|                | E-L1                    | E-L2  | E-L3f | E-L3m | E-P   | E-A   |
| 10.2           |                         |       |       |       |       |       |
| 12.5           |                         |       |       |       |       |       |
| 15.0           | 8.9                     | 13.7  | 21.3  | 58.8  |       |       |
| 17.5           | 10.0                    | 24.6  | 42.8  | 65.6  | 94.0  | 191.2 |
| 20.0           | 8.6                     | 22.2  | 37.0  | 69.0  | 97.8  | 184.1 |
| 22.4           | 7.0                     | 19.7  | 36.6  | 58.8  | 88.7  | 181.5 |
| 25.0           | 8.5                     | 21.9  | 36.2  | 67.5  | 93.9  | 175.3 |
| 27.5           | 9.2                     | 20.6  | 34.6  | 62.1  | 86.7  | 172.8 |
| 30.0           | 7.9                     | 19.5  | 33.4  | 57.1  | 86.8  | 179.9 |
| 32.5           | 8.8                     | 20.5  | 34.5  | 67.3  |       |       |
| mean           | 8.6                     | 20.3  | 34.6  | 63.3  | 91.3  | 180.8 |
| SE             | 0.8                     | 2.9   | 5.7   | 4.4   | 4.2   | 6.0   |
| n              | 8                       | 8     | 8     | 8     | 6     | 6     |
| Regression ADD | 8                       | 20    | 35    | 63    | 91    | 182   |
| % deviation    | 2.1%                    | -0.5% | -0.4% | 0.6%  | -0.1% | -0.6% |
| ADD Range min: | 15.0                    | 15.0  | 15.0  | 15.0  | 15.0  | 15.0  |
| ADD Range max: | 32.5                    | 32.5  | 32.5  | 32.5  | 32.5  | 32.5  |

| Temp (mean)    | Stage ADD by 1/Days |       |      |      |      |      |
|----------------|---------------------|-------|------|------|------|------|
|                | Egg                 | L1    | L2   | L3f  | L3m  | P    |
| 10.2           |                     |       |      |      |      |      |
| 12.5           |                     |       |      |      |      |      |
| 15.0           | 8.9                 | 6.0   | 7.9  |      |      |      |
| 17.5           | 10.0                | 14.7  | 18.9 | 23.3 | 26.2 | 89.2 |
| 20.0           | 8.6                 | 13.8  | 15.0 | 39.3 | 31.4 | 80.5 |
| 22.4           | 7.0                 | 12.7  | 17.2 | 25.1 | 37.1 | 88.2 |
| 25.0           | 8.5                 | 13.5  | 14.5 | 36.4 | 29.9 | 77.8 |
| 27.5           | 9.2                 | 11.7  | 14.2 | 31.2 | 28.1 | 83.0 |
| 30.0           | 7.9                 | 11.7  | 14.0 | 26.3 | 35.9 | 90.2 |
| 32.5           | 8.8                 | 11.9  | 14.1 |      |      | 91.5 |
| mean           | 8.6                 | 12.0  | 14.5 | 30.2 | 31.4 | 85.8 |
| SE             | 0.8                 | 2.5   | 3.0  | 5.9  | 4.0  | 4.9  |
| n              | 8                   | 8     | 8    | 6    | 6    | 7    |
| Regression ADD | 8                   | 12    | 14   | 29   | 30   | 85   |
| % deviation    | 2.1%                | -1.0% | 0.7% | 3.1% | 4.2% | 1.0% |
| ADD Range min: | 15.0                | 15.0  | 15.0 | 17.5 | 20.0 | 15.0 |
| ADD Range max: | 32.5                | 32.5  | 32.5 | 32.5 | 32.5 | 32.5 |

| Temp | % Time in Stage |        |        |        |        |        |
|------|-----------------|--------|--------|--------|--------|--------|
|      | Egg             | L1     | L2     | L3f    | L3m    | P      |
| 10.2 |                 |        |        |        |        |        |
| 12.5 | 5.1%            | 20.6%  | 15.2%  | 3.5%   | 16.8%  | 44.0%  |
| 15.0 | 6.8%            | 10.2%  | 8.5%   | 23.8%  | 2.5%   | 55.0%  |
| 17.5 | 6.9%            | 14.9%  | 15.6%  | 10.3%  | 7.1%   | 52.2%  |
| 20.0 | 5.7%            | 11.9%  | 11.4%  | 18.8%  | 10.0%  | 47.9%  |
| 22.4 | 4.6%            | 10.1%  | 12.3%  | 12.4%  | 13.0%  | 52.2%  |
| 25.0 | 5.6%            | 10.5%  | 10.4%  | 19.4%  | 11.8%  | 48.0%  |
| 27.5 | 6.1%            | 8.9%   | 10.1%  | 17.2%  | 11.9%  | 52.0%  |
| 30.0 | 5.0%            | 8.2%   | 9.3%   | 13.9%  | 15.0%  | 53.5%  |
| 32.5 | 5.1%            | 7.7%   | 8.6%   | 18.5%  | 14.2%  | 51.0%  |
| Mean | 5.65%           | 11.45% | 11.26% | 15.31% | 11.35% | 50.62% |
| SE   | 0.77%           | 3.81%  | 2.49%  | 5.67%  | 4.11%  | 3.22%  |
| CV   | 13.55%          | 33.30% | 22.11% | 37.05% | 36.20% | 6.36%  |

| Temp |      | % Total Development |        |        |        |        |        |
|------|------|---------------------|--------|--------|--------|--------|--------|
| Mean | SE   | E-L1                | E-L2   | E-L3f  | E-L3m  | E-P    | E-A    |
| 10.2 | 0.51 |                     |        |        |        |        |        |
| 12.5 | 0.18 | 1.80%               | 9.09%  | 14.48% | 15.72% | 21.66% | 37.24% |
| 15.0 | 0.14 | 2.64%               | 6.62%  | 9.92%  | 19.17% | 20.14% | 41.52% |
| 17.5 | 0.12 | 2.50%               | 7.92%  | 13.58% | 17.31% | 19.87% | 38.83% |
| 20.0 | 0.09 | 2.17%               | 6.69%  | 11.00% | 18.14% | 21.94% | 40.07% |
| 22.4 | 0.10 | 1.88%               | 6.04%  | 11.10% | 16.24% | 21.60% | 43.15% |
| 25.0 | 0.06 | 2.19%               | 6.27%  | 10.32% | 17.83% | 22.39% | 41.00% |
| 27.5 | 0.06 | 2.46%               | 6.04%  | 10.09% | 17.00% | 21.76% | 42.65% |
| 30.0 | 0.05 | 2.12%               | 5.65%  | 9.63%  | 15.60% | 22.03% | 44.97% |
| 32.5 | 0.02 | 2.15%               | 5.38%  | 9.00%  | 16.75% | 22.69% | 44.04% |
| Mean |      | 2.21%               | 6.63%  | 11.01% | 17.08% | 21.57% | 41.50% |
| SE   |      | 0.26%               | 1.11%  | 1.74%  | 1.10%  | 0.90%  | 2.36%  |
| CV   |      | 11.85%              | 16.75% | 15.77% | 6.45%  | 4.16%  | 5.68%  |

| Temp |      |  | ADD Temp * Days to Stage Transition |      |       |       |     |      |
|------|------|--|-------------------------------------|------|-------|-------|-----|------|
| Mean | SE   |  | E-L1                                | E-L2 | E-L3f | E-L3m | E-P | E-A  |
| 10.2 | 0.51 |  | 0.0                                 |      |       |       |     |      |
| 12.5 | 0.18 |  | 29.7                                | 2.7  | 4.3   | 4.7   | 6.5 | 11.1 |
| 15.0 | 0.14 |  | 26.0                                | 0.9  | 1.3   | 2.5   | 2.7 | 5.5  |
| 17.5 | 0.12 |  | 16.9                                | 0.6  | 1.1   | 1.4   | 1.6 | 3.1  |
| 20.0 | 0.09 |  | 10.3                                | 0.3  | 0.5   | 0.8   | 0.9 | 1.7  |
| 22.4 | 0.10 |  | 6.6                                 | 0.2  | 0.4   | 0.5   | 0.7 | 1.4  |
| 25.0 | 0.06 |  | 6.4                                 | 0.1  | 0.2   | 0.3   | 0.4 | 0.8  |
| 27.5 | 0.06 |  | 5.8                                 | 0.1  | 0.1   | 0.2   | 0.3 | 0.6  |
| 30.0 | 0.05 |  | 4.4                                 | 0.1  | 0.1   | 0.2   | 0.2 | 0.5  |
| 32.5 | 0.02 |  | 4.3                                 | 0.0  | 0.0   | 0.1   | 0.1 | 0.1  |

| Temp |      |  | ADD Temp * Days in Stage |     |     |     |     |     |
|------|------|--|--------------------------|-----|-----|-----|-----|-----|
| Mean | SE   |  | Egg                      | L1  | L2  | L3f | L3m | P   |
| 10.2 | 0.51 |  |                          |     |     |     |     |     |
| 12.5 | 0.18 |  | 0.5                      | 2.2 | 1.6 | 0.4 | 1.8 | 4.6 |
| 15.0 | 0.14 |  | 0.3                      | 0.5 | 0.4 | 1.2 | 0.1 | 2.8 |
| 17.5 | 0.12 |  | 0.2                      | 0.4 | 0.5 | 0.3 | 0.2 | 1.5 |
| 20.0 | 0.09 |  | 0.1                      | 0.2 | 0.2 | 0.3 | 0.2 | 0.8 |
| 22.4 | 0.10 |  | 0.1                      | 0.1 | 0.2 | 0.2 | 0.2 | 0.7 |
| 25.0 | 0.06 |  | 0.0                      | 0.1 | 0.1 | 0.1 | 0.1 | 0.3 |
| 27.5 | 0.06 |  | 0.0                      | 0.0 | 0.1 | 0.1 | 0.1 | 0.3 |
| 30.0 | 0.05 |  | 0.0                      | 0.0 | 0.0 | 0.1 | 0.1 | 0.3 |
| 32.5 | 0.02 |  | 0.0                      | 0.0 | 0.0 | 0.0 | 0.0 | 0.1 |

For Deming Regressions

| Temp |      |     | Temp * Days to Stage Transition |      |       |       |     |      |     |
|------|------|-----|---------------------------------|------|-------|-------|-----|------|-----|
| Mean | SE   |     | E-L1                            | E-L2 | E-L3f | E-L3m | E-P | E-A  |     |
| 10.2 | 0.51 | 0.0 | 0.0                             | 0.0  | 0.0   | 0.0   | 0.0 | 0.0  | 0.0 |
| 12.5 | 0.18 | 0.5 | 0.5                             | 2.7  | 4.3   | 4.7   | 6.5 | 11.1 |     |
| 15.0 | 0.14 | 0.3 | 0.3                             | 0.9  | 1.3   | 2.5   | 2.7 | 5.5  |     |
| 17.5 | 0.12 | 0.2 | 0.2                             | 0.6  | 1.1   | 1.4   | 1.6 | 3.1  |     |
| 20.0 | 0.09 | 0.1 | 0.1                             | 0.3  | 0.5   | 0.8   | 0.9 | 1.7  |     |
| 22.4 | 0.10 | 0.1 | 0.1                             | 0.2  | 0.4   | 0.5   | 0.7 | 1.4  |     |
| 25.0 | 0.06 | 0.0 | 0.0                             | 0.1  | 0.2   | 0.3   | 0.4 | 0.8  |     |
| 27.5 | 0.06 | 0.0 | 0.0                             | 0.1  | 0.1   | 0.2   | 0.3 | 0.6  |     |
| 30.0 | 0.05 | 0.0 | 0.0                             | 0.1  | 0.1   | 0.2   | 0.2 | 0.5  |     |
| 32.5 | 0.02 | 0.0 | 0.0                             | 0.0  | 0.0   | 0.1   | 0.1 | 0.1  |     |

| Temp |      |     | Temp * Days in Stage |     |     |     |     |     |
|------|------|-----|----------------------|-----|-----|-----|-----|-----|
| Mean | SE   |     | Egg                  | L1  | L2  | L3f | L3m | P   |
| 10.2 | 0.51 | 0.0 | 0.0                  | 0.0 | 0.0 | 0.0 | 0.0 | 0.0 |
| 12.5 | 0.18 | 0.5 | 0.5                  | 2.2 | 1.6 | 0.4 | 1.8 | 4.6 |
| 15.0 | 0.14 | 0.3 | 0.3                  | 0.5 | 0.4 | 1.2 | 0.1 | 2.8 |
| 17.5 | 0.12 | 0.2 | 0.2                  | 0.4 | 0.5 | 0.3 | 0.2 | 1.5 |
| 20.0 | 0.09 | 0.1 | 0.1                  | 0.2 | 0.2 | 0.3 | 0.2 | 0.8 |
| 22.4 | 0.10 | 0.1 | 0.1                  | 0.1 | 0.2 | 0.2 | 0.2 | 0.7 |
| 25.0 | 0.06 | 0.0 | 0.0                  | 0.1 | 0.1 | 0.1 | 0.1 | 0.3 |
| 27.5 | 0.06 | 0.0 | 0.0                  | 0.0 | 0.1 | 0.1 | 0.1 | 0.3 |
| 30.0 | 0.05 | 0.0 | 0.0                  | 0.0 | 0.0 | 0.1 | 0.1 | 0.3 |
| 32.5 | 0.02 | 0.0 | 0.0                  | 0.0 | 0.0 | 0.0 | 0.0 | 0.1 |

Data for Prism polynomial fit for egg development

| Temp | Egg   |
|------|-------|
| 10.2 | 0.155 |
| 12.5 | 0.742 |
| 15.0 | 0.465 |
| 17.5 | 0.526 |
| 20.0 | 0.857 |
| 22.4 | 1.084 |
| 25.0 | 1.418 |
| 27.5 | 2.028 |
| 30.0 | 2.098 |
| 32.5 | 1.743 |

## Supplementary Materials S5

Datasets and statistical analysis summary of *Phormia regina* nonlinear regressions for percent in stage by temperature. Regression equations are :

Gaussian equation (a standard normal curve):

$$y = a \exp \left[ -\frac{1}{2} \left( \frac{x-b}{c} \right)^2 \right]$$

Modified Gaussian equation (a form of Gaussian curve with a plateau at 100%):

$$y = a \exp \left[ -\frac{1}{2} \left( \frac{|x-b|}{c} \right)^d \right]$$

Cumulative Gaussian equation (a form of the Gaussian curve used for adults, to model a sigmoidal increase to a plateau)

$$y = \frac{a}{2} \left[ 1 + \operatorname{erf} \left( \frac{x-b}{\sqrt{2}c} \right) \right]$$

Reversed cumulative Gaussian equation (a form of the cumulative Gaussian equation used for eggs, to model a sigmoidal decrease from a plateau)

$$y = \frac{a}{2} \left[ 1 - \operatorname{erf} \left( \frac{x-b}{\sqrt{2}c} \right) \right]$$

where x = development time (hours) and y = percent in stage. Where “interrupted” is indicated on a regression, data were insufficient to fit a curve (typically this means we obtained too few points in measuring portions of the transition curve). Where “ambiguous” is indicated on a regression, the program could not reach a final solution by iterative (numerical) methods. The analysis is from GraphPad Prism 6.0 which uses the Marquardt and Levenberg approach for non-linear regression.

*P. regina* 10.0° C.

| P. regina 10.0°C         |                |          |          |           |          |           |               |                          |           |                   |           |           |                           |                          |   |
|--------------------------|----------------|----------|----------|-----------|----------|-----------|---------------|--------------------------|-----------|-------------------|-----------|-----------|---------------------------|--------------------------|---|
| Dataset                  |                |          |          |           |          |           |               |                          |           |                   |           |           |                           |                          |   |
| Time                     | egg            |          |          | L1        |          |           | L2            |                          |           | L3f               |           |           | L3r                       |                          |   |
|                          | Mean           | SE       |          | Mean      | SE       |           | Mean          | SE                       |           | Mean              | SE        |           | Mean                      | SE                       |   |
| 0.0                      | 100            |          | 0        | 0         | 0        | 0         | 0             | 0                        | 0         | 0                 | 0         | 0         | 0                         | 0                        | 0 |
| 17.5                     | 100            | 0        | 0        | 0         | 0        | 0         | 0             | 0                        | 0         | 0                 | 0         | 0         | 0                         | 0                        | 0 |
| 32.1                     | 100            | 0        | 0        | 0         | 0        | 0         | 0             | 0                        | 0         | 0                 | 0         | 0         | 0                         | 0                        | 0 |
| 48.2                     | 100            | 0        | 0        | 0         | 0        | 0         | 0             | 0                        | 0         | 0                 | 0         | 0         | 0                         | 0                        | 0 |
| 64.1                     | 100            | 0        | 0        | 0         | 0        | 0         | 0             | 0                        | 0         | 0                 | 0         | 0         | 0                         | 0                        | 0 |
| 80.1                     | 100            | 0        | 0        | 0         | 0        | 0         | 0             | 0                        | 0         | 0                 | 0         | 0         | 0                         | 0                        | 0 |
| 124.3                    | 72.8           | 35.1     | 27.2     | 35.1      | 0        | 0         | 0             | 0                        | 0         | 0                 | 0         | 0         | 0                         | 0                        | 0 |
| 168.1                    | 36.7           | 32.6     | 63.3     | 32.6      | 0        | 0         | 0             | 0                        | 0         | 0                 | 0         | 0         | 0                         | 0                        | 0 |
| 212.1                    | 35             | 40.9     | 65       | 40.9      | 0        | 0         | 0             | 0                        | 0         | 0                 | 0         | 0         | 0                         | 0                        | 0 |
| 256.1                    | 47.5           | 47.6     | 52.5     | 47.6      | 0        | 0         | 0             | 0                        | 0         | 0                 | 0         | 0         | 0                         | 0                        | 0 |
| 292.0                    | 16.7           | 23.6     | 83.3     | 23.6      | 0        | 0         | 0             | 0                        | 0         | 0                 | 0         | 0         | 0                         | 0                        | 0 |
| 363.1                    | 0              | 0        | 100      | 0         | 0        | 0         | 0             | 0                        | 0         | 0                 | 0         | 0         | 0                         | 0                        | 0 |
| 426.1                    | 0              | 0        | 100      | 0         | 0        | 0         | 0             | 0                        | 0         | 0                 | 0         | 0         | 0                         | 0                        | 0 |
|                          | Gaussian       |          |          | L1        |          |           | L2            |                          |           | Modified Gaussian |           |           | Cumulative Gaussian       |                          |   |
|                          | L1             | L2       | P        | Ambiguous | L3m      | Ambiguous | Not converged | Ambiguous                | L3        | Ambiguous         | L3m       | Ambiguous | Best-fit values           | A                        |   |
| Best-fit values          |                |          |          |           |          |           |               |                          |           |                   |           |           |                           |                          |   |
| Amplitude                | 101.4          | 0        | 0        | 0         | 0        | 0         | a             | ~ 0.0                    | 0         | 0                 | 0         | 0         | Mean                      | ~ 63.947                 |   |
| Mean                     | 381.9 ~ 152.0  | ~ 0.0    | ~ 0.0    | ~ 0.0     | ~ 0.0    | ~ 0.0     | b             | ~ 0.0                    | ~ 0.0     | ~ 1.000           | ~ 1.000   | ~ 1.000   | Std. Error                | ~ 22871                  |   |
| SD                       | 149.8 ~ 42.57  | ~ 42.61  | ~ 42.61  | ~ 42.61   | ~ 42.61  | ~ 42.61   | c             | ~ 1.000                  | ~ 1.000   | ~ 1.000           | ~ 1.000   | ~ 1.000   | Mean                      | 95% Confidence Intervals |   |
| Std. Error               |                |          |          |           |          |           | d             | ~ 1.000                  | ~ 1.000   | ~ 1.000           | ~ 1.000   | ~ 1.000   | SD                        | 192.2<br>94.74           |   |
| Amplitude                | 8.271          |          |          |           |          |           |               |                          |           |                   |           |           | 95% Confidence Intervals  | 13.46<br>17.55           |   |
| Mean                     | 33.11          |          |          |           |          |           | a             |                          |           |                   |           |           | Mean                      | 162.5 to 221.8           |   |
| SD                       | 25.22          |          |          |           |          |           | b             |                          |           |                   |           |           | SD                        | 56.11 to 133.4           |   |
| 95% Confidence Intervals | 82.99 to 119.8 |          |          |           |          |           | c             |                          |           |                   |           |           | Goodness of Fit           | 11                       |   |
| Amplitude                | 308.1 to 455.7 |          |          |           |          |           | d             |                          |           |                   |           |           | Degrees of Freedom        | 0.993                    |   |
| Mean                     | 93.65 to 206.0 |          |          |           |          |           | a             |                          |           |                   |           |           | R square                  | 1                        |   |
| SD                       |                |          |          |           |          |           | b             |                          |           |                   |           |           | Absolute Sum of Squ       | 421                      |   |
| Goodness of Fit          |                |          |          |           |          |           |               | 95% Confidence Intervals |           |                   |           |           | Sy.x                      | 11.36                    |   |
| df                       | 10             | 10       | 10       | 10        | 10       | 10        | c             |                          |           |                   |           |           | Number of points          | Runs                     |   |
| R square                 | 0.9165         | 1        | 1        | 1         | 1        | 1         | d             |                          |           |                   |           |           | 9 Analyzed                | 8                        |   |
| Absolute SS              | 1678           | 0        | 0        | 0         | 0        | 0         | e             |                          |           |                   |           |           | Number of runs            | 5                        |   |
| Sy.x                     | 12.96          |          |          |           |          |           | f             |                          |           |                   |           |           | P value (runs test)       | 4                        |   |
| Constraints              | SD > 0.0       | SD > 0.0 | SD > 0.0 | SD > 0.0  | SD > 0.0 | SD > 0.0  |               | Goodness of Fit          |           |                   |           |           | Deviation from Model      | 0.0536                   |   |
| SD                       |                |          |          |           |          |           |               | R square                 | 9         | 9                 | 9         | 9         | Not Significant           | Not Significant          |   |
|                          |                |          |          |           |          |           |               | Absolute SS              | 1         | 1                 | 1         | 1         | Number of points Analyzed | 13                       |   |
|                          |                |          |          |           |          |           |               | Sy.x                     | 0         | 0                 | 0         | 0         | Number of points Analyzed | 13                       |   |
|                          |                |          |          |           |          |           |               | Constraints              |           |                   |           |           | Number of points Analyzed | 13                       |   |
|                          |                |          |          |           |          |           |               | c                        | c > 0.0   | c > 0.0           | c > 0.0   | c > 0.0   | Number of points Analyzed | 13                       |   |
|                          |                |          |          |           |          |           |               | d                        | d > 1.000 | d > 1.000         | d > 1.000 | d > 1.000 | Number of points Analyzed | 13                       |   |



*P. regina* 12.5° C.

[illegible]

| P. regina 15.0°C |      |    |   |      |    |   |      |    |   |      |    |   |      |    |   |      |    |   |      |    |   |  |
|------------------|------|----|---|------|----|---|------|----|---|------|----|---|------|----|---|------|----|---|------|----|---|--|
| Dataset          |      |    |   |      |    |   |      |    |   |      |    |   |      |    |   |      |    |   |      |    |   |  |
| Time             | egg  |    |   | L1   |    |   | L2   |    |   | L3f  |    |   | L3m  |    |   | P    |    |   | A    |    |   |  |
|                  | Mean | SE |   | Mean | SE |   | Mean | SE |   | Mean | SE |   | Mean | SE |   | Mean | SE |   | Mean | SE |   |  |
| 0.0              | 100  | 0  | 0 | 0    | 0  | 0 | 0    | 0  | 0 | 0    | 0  | 0 | 0    | 0  | 0 | 0    | 0  | 0 | 0    | 0  | 0 |  |
| 8.1              | 100  | 0  | 0 | 0    | 0  | 0 | 0    | 0  | 0 | 0    | 0  | 0 | 0    | 0  | 0 | 0    | 0  | 0 | 0    | 0  | 0 |  |
| 16.1             | 100  | 0  | 0 | 0    | 0  | 0 | 0    | 0  | 0 | 0    | 0  | 0 | 0    | 0  | 0 | 0    | 0  | 0 | 0    | 0  | 0 |  |
| 24.1             | 100  | 0  | 0 | 0    | 0  | 0 | 0    | 0  | 0 | 0    | 0  | 0 | 0    | 0  | 0 | 0    | 0  | 0 | 0    | 0  | 0 |  |
| 32.1             | 100  | 0  | 0 | 0    | 0  | 0 | 0    | 0  | 0 | 0    | 0  | 0 | 0    | 0  | 0 | 0    | 0  | 0 | 0    | 0  | 0 |  |
| 40.1             | 100  | 0  | 0 | 0    | 0  | 0 | 0    | 0  | 0 | 0    | 0  | 0 | 0    | 0  | 0 | 0    | 0  | 0 | 0    | 0  | 0 |  |
| 48.1             | 100  | 0  | 0 | 0    | 0  | 0 | 0    | 0  | 0 | 0    | 0  | 0 | 0    | 0  | 0 | 0    | 0  | 0 | 0    | 0  | 0 |  |
| 56.1             | 100  | 0  | 0 | 0    | 0  | 0 | 0    | 0  | 0 | 0    | 0  | 0 | 0    | 0  | 0 | 0    | 0  | 0 | 0    | 0  | 0 |  |
| 64.1             | 100  | 0  | 0 | 0    | 0  | 0 | 0    | 0  | 0 | 0    | 0  | 0 | 0    | 0  | 0 | 0    | 0  | 0 | 0    | 0  | 0 |  |
| 72.1             | 100  | 0  | 0 | 0    | 0  | 0 | 0    | 0  | 0 | 0    | 0  | 0 | 0    | 0  | 0 | 0    | 0  | 0 | 0    | 0  | 0 |  |
| 80.1             | 100  | 0  | 0 | 0    | 0  | 0 | 0    | 0  | 0 | 0    | 0  | 0 | 0    | 0  | 0 | 0    | 0  | 0 | 0    | 0  | 0 |  |
| 88.1             | 100  | 0  | 0 | 0    | 0  | 0 | 0    | 0  | 0 | 0    | 0  | 0 | 0    | 0  | 0 | 0    | 0  | 0 | 0    | 0  | 0 |  |
| 96.1             | 100  | 0  | 0 | 0    | 0  | 0 | 0    | 0  | 0 | 0    | 0  | 0 | 0    | 0  | 0 | 0    | 0  | 0 | 0    | 0  | 0 |  |
| 104.1            | 100  | 0  | 0 | 0    | 0  | 0 | 0    | 0  | 0 | 0    | 0  | 0 | 0    | 0  | 0 | 0    | 0  | 0 | 0    | 0  | 0 |  |
| 112.1            | 100  | 0  | 0 | 0    | 0  | 0 | 0    | 0  | 0 | 0    | 0  | 0 | 0    | 0  | 0 | 0    | 0  | 0 | 0    | 0  | 0 |  |
| 120.1            | 100  | 0  | 0 | 0    | 0  | 0 | 0    | 0  | 0 | 0    | 0  | 0 | 0    | 0  | 0 | 0    | 0  | 0 | 0    | 0  | 0 |  |
| 128.1            | 100  | 0  | 0 | 0    | 0  | 0 | 0    | 0  | 0 | 0    | 0  | 0 | 0    | 0  | 0 | 0    | 0  | 0 | 0    | 0  | 0 |  |
| 136.1            | 100  | 0  | 0 | 0    | 0  | 0 | 0    | 0  | 0 | 0    | 0  | 0 | 0    | 0  | 0 | 0    | 0  | 0 | 0    | 0  | 0 |  |
| 144.1            | 100  | 0  | 0 | 0    | 0  | 0 | 0    | 0  | 0 | 0    | 0  | 0 | 0    | 0  | 0 | 0    | 0  | 0 | 0    | 0  | 0 |  |
| 152.1            | 100  | 0  | 0 | 0    | 0  | 0 | 0    | 0  | 0 | 0    | 0  | 0 | 0    | 0  | 0 | 0    | 0  | 0 | 0    | 0  | 0 |  |
| 160.1            | 100  | 0  | 0 | 0    | 0  | 0 | 0    | 0  | 0 | 0    | 0  | 0 | 0    | 0  | 0 | 0    | 0  | 0 | 0    | 0  | 0 |  |
| 168.1            | 100  | 0  | 0 | 0    | 0  | 0 | 0    | 0  | 0 | 0    | 0  | 0 | 0    | 0  | 0 | 0    | 0  | 0 | 0    | 0  | 0 |  |
| 176.1            | 100  | 0  | 0 | 0    | 0  | 0 | 0    | 0  | 0 | 0    | 0  | 0 | 0    | 0  | 0 | 0    | 0  | 0 | 0    | 0  | 0 |  |
| 184.1            | 100  | 0  | 0 | 0    | 0  | 0 | 0    | 0  | 0 | 0    | 0  | 0 | 0    | 0  | 0 | 0    | 0  | 0 | 0    | 0  | 0 |  |
| 192.1            | 100  | 0  | 0 | 0    | 0  | 0 | 0    | 0  | 0 | 0    | 0  | 0 | 0    | 0  | 0 | 0    | 0  | 0 | 0    | 0  | 0 |  |
| 200.1            | 100  | 0  | 0 | 0    | 0  | 0 | 0    | 0  | 0 | 0    | 0  | 0 | 0    | 0  | 0 | 0    | 0  | 0 | 0    | 0  | 0 |  |
| 208.1            | 100  | 0  | 0 | 0    | 0  | 0 | 0    | 0  | 0 | 0    | 0  | 0 | 0    | 0  | 0 | 0    | 0  | 0 | 0    | 0  | 0 |  |
| 216.1            | 100  | 0  | 0 | 0    | 0  | 0 | 0    | 0  | 0 | 0    | 0  | 0 | 0    | 0  | 0 | 0    | 0  | 0 | 0    | 0  | 0 |  |
| 224.1            | 100  | 0  | 0 | 0    | 0  | 0 | 0    | 0  | 0 | 0    | 0  | 0 | 0    | 0  | 0 | 0    | 0  | 0 | 0    | 0  | 0 |  |
| 232.1            | 100  | 0  | 0 | 0    | 0  | 0 | 0    | 0  | 0 | 0    | 0  | 0 | 0    | 0  | 0 | 0    | 0  | 0 | 0    | 0  | 0 |  |
| 240.1            | 100  | 0  | 0 | 0    | 0  | 0 | 0    | 0  | 0 | 0    | 0  | 0 | 0    | 0  | 0 | 0    | 0  | 0 | 0    | 0  | 0 |  |
| 248.1            | 100  | 0  | 0 | 0    | 0  | 0 | 0    | 0  | 0 | 0    | 0  | 0 | 0    | 0  | 0 | 0    | 0  | 0 | 0    | 0  | 0 |  |
| 256.1            | 100  | 0  | 0 | 0    | 0  | 0 | 0    | 0  | 0 | 0    | 0  | 0 | 0    | 0  | 0 | 0    | 0  | 0 | 0    | 0  | 0 |  |
| 264.1            | 100  | 0  | 0 | 0    | 0  | 0 | 0    | 0  | 0 | 0    | 0  | 0 | 0    | 0  | 0 | 0    | 0  | 0 | 0    | 0  | 0 |  |
| 272.1            | 100  | 0  | 0 | 0    | 0  | 0 | 0    | 0  | 0 | 0    | 0  | 0 | 0    | 0  | 0 | 0    | 0  | 0 | 0    | 0  | 0 |  |
| 280.1            | 100  | 0  | 0 | 0    | 0  | 0 | 0    | 0  | 0 | 0    | 0  | 0 | 0    | 0  | 0 | 0    | 0  | 0 | 0    | 0  | 0 |  |
| 288.1            | 100  | 0  | 0 | 0    | 0  | 0 | 0    | 0  | 0 | 0    | 0  | 0 | 0    | 0  | 0 | 0    | 0  | 0 | 0    | 0  | 0 |  |
| 296.1            | 100  | 0  | 0 | 0    | 0  | 0 | 0    | 0  | 0 | 0    | 0  | 0 | 0    | 0  | 0 | 0    | 0  | 0 | 0    | 0  | 0 |  |
| 304.1            | 100  | 0  | 0 | 0    | 0  | 0 | 0    | 0  | 0 | 0    | 0  | 0 | 0    | 0  | 0 | 0    | 0  | 0 | 0    | 0  | 0 |  |
| 312.1            | 100  | 0  | 0 | 0    | 0  | 0 | 0    | 0  | 0 | 0    | 0  | 0 | 0    | 0  | 0 | 0    | 0  | 0 | 0    | 0  | 0 |  |
| 320.1            | 100  | 0  | 0 | 0    | 0  | 0 | 0    | 0  | 0 | 0    | 0  | 0 | 0    | 0  | 0 | 0    | 0  | 0 | 0    | 0  | 0 |  |
| 328.1            | 100  | 0  | 0 | 0    | 0  | 0 | 0    | 0  | 0 | 0    | 0  | 0 | 0    | 0  | 0 | 0    | 0  | 0 | 0    | 0  | 0 |  |
| 336.1            | 100  | 0  | 0 | 0    | 0  | 0 | 0    | 0  | 0 | 0    | 0  | 0 | 0    | 0  | 0 | 0    | 0  | 0 | 0    | 0  | 0 |  |
| 344.1            | 100  | 0  | 0 | 0    | 0  | 0 | 0    | 0  | 0 | 0    | 0  | 0 | 0    | 0  | 0 | 0    | 0  | 0 | 0    | 0  | 0 |  |
| 352.1            | 100  | 0  | 0 | 0    | 0  | 0 | 0    | 0  | 0 | 0    | 0  | 0 | 0    | 0  | 0 | 0    | 0  | 0 | 0    | 0  | 0 |  |
| 360.1            | 100  | 0  | 0 | 0    | 0  | 0 | 0    | 0  | 0 | 0    | 0  | 0 | 0    | 0  | 0 | 0    | 0  | 0 | 0    | 0  | 0 |  |
| 368.1            | 100  | 0  | 0 | 0    | 0  | 0 | 0    | 0  | 0 | 0    | 0  | 0 | 0    | 0  | 0 | 0    | 0  | 0 | 0    | 0  | 0 |  |
| 376.1            | 100  | 0  | 0 | 0    | 0  | 0 | 0    | 0  | 0 | 0    | 0  | 0 | 0    | 0  | 0 | 0    | 0  | 0 | 0    | 0  | 0 |  |
| 384.1            | 100  | 0  | 0 | 0    | 0  | 0 | 0    | 0  | 0 | 0    | 0  | 0 | 0    | 0  | 0 | 0    | 0  | 0 | 0    | 0  | 0 |  |
| 392.1            | 100  | 0  | 0 | 0    | 0  | 0 | 0    | 0  | 0 | 0    | 0  | 0 | 0    | 0  | 0 | 0    | 0  | 0 | 0    | 0  | 0 |  |
| 400.1            | 100  | 0  | 0 | 0    | 0  | 0 | 0    | 0  | 0 | 0    | 0  | 0 | 0    | 0  | 0 | 0    | 0  | 0 | 0    | 0  | 0 |  |
| 408.1            | 100  | 0  | 0 | 0    | 0  | 0 | 0    | 0  | 0 | 0    | 0  | 0 | 0    | 0  | 0 | 0    | 0  | 0 | 0    | 0  | 0 |  |
| 416.1            | 100  | 0  | 0 | 0    | 0  | 0 | 0    | 0  | 0 | 0    | 0  | 0 | 0    | 0  | 0 | 0    | 0  | 0 | 0    | 0  | 0 |  |
| 424.1            | 100  | 0  | 0 | 0    | 0  | 0 | 0    | 0  | 0 | 0    | 0  | 0 | 0    | 0  | 0 | 0    | 0  | 0 | 0    | 0  | 0 |  |
| 432.1            | 100  | 0  | 0 | 0    | 0  | 0 | 0    | 0  | 0 | 0    | 0  | 0 | 0    | 0  | 0 | 0    | 0  | 0 | 0    | 0  | 0 |  |
| 440.1            | 100  | 0  | 0 | 0    | 0  | 0 | 0    | 0  | 0 | 0    | 0  | 0 | 0    | 0  | 0 | 0    | 0  | 0 | 0    | 0  | 0 |  |
| 448.1            | 100  | 0  | 0 | 0    | 0  | 0 | 0    | 0  | 0 | 0    | 0  | 0 | 0    | 0  | 0 | 0    | 0  | 0 | 0    | 0  | 0 |  |
| 456.1            | 100  | 0  | 0 | 0    | 0  | 0 | 0    | 0  | 0 | 0    | 0  | 0 | 0    | 0  | 0 | 0    | 0  | 0 | 0    | 0  | 0 |  |
| 464.1            | 100  | 0  | 0 | 0    | 0  | 0 | 0    | 0  | 0 | 0    | 0  | 0 | 0    | 0  | 0 | 0    | 0  | 0 | 0    | 0  | 0 |  |
| 472.1            | 100  | 0  | 0 | 0    | 0  | 0 | 0    | 0  | 0 | 0    | 0  | 0 | 0    | 0  | 0 | 0    | 0  | 0 | 0    | 0  | 0 |  |
| 480.1            | 100  | 0  | 0 | 0    | 0  | 0 | 0    | 0  | 0 | 0    | 0  | 0 | 0    | 0  | 0 | 0    | 0  | 0 | 0    | 0  | 0 |  |
| 488.1            | 100  | 0  | 0 | 0    | 0  | 0 | 0    | 0  | 0 | 0    | 0  | 0 | 0    | 0  | 0 | 0    | 0  | 0 | 0    | 0  | 0 |  |
| 496.1            | 100  | 0  | 0 | 0    | 0  | 0 | 0    | 0  | 0 | 0    | 0  | 0 | 0    | 0  | 0 | 0    | 0  | 0 | 0    | 0  | 0 |  |
| 504.1            | 100  | 0  | 0 | 0    | 0  | 0 | 0    | 0  | 0 | 0    | 0  | 0 | 0    | 0  | 0 | 0    | 0  | 0 | 0    | 0  | 0 |  |
| 512.1            | 100  | 0  | 0 | 0    | 0  | 0 | 0    | 0  | 0 | 0    | 0  | 0 | 0    | 0  | 0 | 0    | 0  | 0 | 0    | 0  | 0 |  |
| 520.1            | 100  | 0  | 0 | 0    | 0  | 0 | 0    | 0  | 0 | 0    | 0  | 0 | 0    | 0  | 0 | 0    | 0  | 0 | 0    | 0  | 0 |  |
| 528.1            | 100  | 0  | 0 | 0    | 0  | 0 | 0    | 0  | 0 | 0    | 0  | 0 | 0    | 0  | 0 | 0    | 0  | 0 | 0    | 0  | 0 |  |
| 536.1            | 100  | 0  | 0 | 0    | 0  | 0 | 0    | 0  | 0 | 0    | 0  | 0 | 0    | 0  | 0 | 0    | 0  | 0 | 0    | 0  | 0 |  |
| 544.1            | 100  | 0  | 0 | 0    | 0  | 0 | 0    | 0  | 0 | 0    | 0  | 0 | 0    | 0  | 0 | 0    | 0  | 0 | 0    | 0  | 0 |  |
| 552.1            | 100  | 0  | 0 | 0    | 0  | 0 | 0    | 0  | 0 | 0    | 0  | 0 | 0    | 0  | 0 | 0    | 0  | 0 | 0    | 0  | 0 |  |
| 560.1            | 100  | 0  | 0 | 0    | 0  | 0 | 0    | 0  | 0 | 0    | 0  | 0 | 0    | 0  | 0 | 0    | 0  | 0 | 0    | 0  | 0 |  |
| 568.1            | 100  | 0  | 0 | 0    | 0  | 0 | 0    | 0  | 0 | 0    | 0  | 0 | 0    | 0  | 0 | 0    | 0  | 0 | 0    | 0  | 0 |  |
| 576.1            | 100  | 0  | 0 | 0    | 0  | 0 | 0    | 0  | 0 | 0    | 0  | 0 | 0    | 0  | 0 | 0    | 0  | 0 | 0    | 0  | 0 |  |
| 584.1            | 100  | 0  | 0 | 0    | 0  | 0 | 0    | 0  | 0 | 0    | 0  | 0 | 0    | 0  | 0 | 0    | 0  | 0 | 0    | 0  | 0 |  |
| 592.1            | 100  | 0  | 0 | 0    | 0  | 0 | 0    | 0  | 0 | 0    | 0  | 0 | 0    | 0  | 0 | 0    | 0  | 0 | 0    | 0  | 0 |  |
| 600.1            | 100  | 0  | 0 | 0    | 0  | 0 | 0    | 0  | 0 | 0    | 0  | 0 | 0    | 0  | 0 | 0    | 0  | 0 | 0    | 0  | 0 |  |
| 608.1            | 100  | 0  | 0 | 0    | 0  | 0 | 0    | 0  | 0 | 0    | 0  | 0 | 0    | 0  | 0 | 0    | 0  | 0 | 0    | 0  | 0 |  |
| 616.1            | 100  | 0  | 0 | 0    | 0  | 0 | 0    | 0  | 0 | 0    | 0  | 0 | 0    | 0  | 0 | 0    | 0  | 0 | 0    | 0  | 0 |  |
| 624.1            | 100  | 0  | 0 | 0    | 0  | 0 | 0    | 0  | 0 | 0    | 0  | 0 | 0    | 0  | 0 | 0    | 0  | 0 | 0    | 0  | 0 |  |
| 632.1            | 100  | 0  | 0 | 0    | 0  | 0 | 0    | 0  | 0 | 0    | 0  | 0 | 0    | 0  | 0 | 0    | 0  | 0 | 0    | 0  | 0 |  |
| 640.1            | 100  | 0  | 0 | 0    | 0  | 0 | 0    | 0  | 0 | 0    | 0  | 0 | 0    | 0  | 0 | 0    | 0  | 0 | 0    | 0  | 0 |  |
| 648.1            | 100  | 0  | 0 | 0    | 0  | 0 | 0    | 0  | 0 | 0    | 0  | 0 | 0    | 0  | 0 | 0    | 0  | 0 | 0    | 0  | 0 |  |
| 656.1            | 100  | 0  | 0 | 0    | 0  | 0 | 0    | 0  | 0 | 0    | 0  | 0 | 0    | 0  | 0 | 0    | 0  | 0 | 0    | 0  | 0 |  |
| 664.1            | 100  | 0  | 0 | 0    | 0  | 0 | 0    | 0  | 0 | 0    | 0  | 0 | 0    | 0  | 0 | 0    | 0  | 0 | 0    | 0  | 0 |  |
| 672.1            | 100  | 0  | 0 | 0    | 0  | 0 | 0    | 0  | 0 | 0    | 0  | 0 | 0    | 0  | 0 | 0    | 0  | 0 | 0    | 0  | 0 |  |
| 680.1            | 100  | 0  | 0 | 0    | 0  | 0 | 0    | 0  | 0 | 0    | 0  | 0 | 0    |    |   |      |    |   |      |    |   |  |

*P. regina* 17.5° C.

[illegible]

[illegible]

| P. regina 22.5 °C |         |      |      |      |      |      |      |      |      |      |      |    |      |    |      |    |      |    |      |    |      |    |      |    |   |  |  |  |
|-------------------|---------|------|------|------|------|------|------|------|------|------|------|----|------|----|------|----|------|----|------|----|------|----|------|----|---|--|--|--|
| Time              | Dataset |      |      |      |      |      |      |      |      |      |      |    |      |    |      |    |      |    |      |    |      |    |      |    |   |  |  |  |
|                   | egg     |      |      |      | L1   |      |      |      | L2   |      |      |    | L3   |    |      |    | L3m  |    |      |    | P    |    |      |    | A |  |  |  |
|                   | Mean    | SE   | Mean | SE   | Mean | SE   | Mean | SE   | Mean | SE   | Mean | SE | Mean | SE | Mean | SE | Mean | SE | Mean | SE | Mean | SE | Mean | SE |   |  |  |  |
| 0.0               | 100     | 0    | 0    | 0    | 0    | 0    | 0    | 0    | 0    | 0    | 0    | 0  | 0    | 0  | 0    | 0  | 0    | 0  | 0    | 0  | 0    | 0  | 0    |    |   |  |  |  |
| 3.0               | 100     | 0    | 0    | 0    | 0    | 0    | 0    | 0    | 0    | 0    | 0    | 0  | 0    | 0  | 0    | 0  | 0    | 0  | 0    | 0  | 0    | 0  | 0    |    |   |  |  |  |
| 6.0               | 100     | 0    | 0    | 0    | 0    | 0    | 0    | 0    | 0    | 0    | 0    | 0  | 0    | 0  | 0    | 0  | 0    | 0  | 0    | 0  | 0    | 0  | 0    |    |   |  |  |  |
| 9.1               | 100     | 0    | 0    | 0    | 0    | 0    | 0    | 0    | 0    | 0    | 0    | 0  | 0    | 0  | 0    | 0  | 0    | 0  | 0    | 0  | 0    | 0  | 0    |    |   |  |  |  |
| 12.1              | 100     | 0    | 0    | 0    | 0    | 0    | 0    | 0    | 0    | 0    | 0    | 0  | 0    | 0  | 0    | 0  | 0    | 0  | 0    | 0  | 0    | 0  | 0    |    |   |  |  |  |
| 15.3              | 72.2    | 24.6 | 27.8 | 24.6 | 0    | 0    | 0    | 0    | 0    | 0    | 0    | 0  | 0    | 0  | 0    | 0  | 0    | 0  | 0    | 0  | 0    | 0  | 0    |    |   |  |  |  |
| 24.3              | 0       | 100  | 0    | 0    | 0    | 0    | 0    | 0    | 0    | 0    | 0    | 0  | 0    | 0  | 0    | 0  | 0    | 0  | 0    | 0  | 0    | 0  | 0    |    |   |  |  |  |
| 32.8              | 0       | 100  | 0    | 0    | 0    | 0    | 0    | 0    | 0    | 0    | 0    | 0  | 0    | 0  | 0    | 0  | 0    | 0  | 0    | 0  | 0    | 0  | 0    |    |   |  |  |  |
| 42.1              | 0       | 100  | 0    | 0    | 0    | 0    | 0    | 0    | 0    | 0    | 0    | 0  | 0    | 0  | 0    | 0  | 0    | 0  | 0    | 0  | 0    | 0  | 0    |    |   |  |  |  |
| 51.2              | 0       | 30.1 | 40.6 | 69.9 | 40.6 | 0    | 0    | 0    | 0    | 0    | 0    | 0  | 0    | 0  | 0    | 0  | 0    | 0  | 0    | 0  | 0    | 0  | 0    |    |   |  |  |  |
| 60.2              | 0       | 1.5  | 2.5  | 98.5 | 2.5  | 0    | 0    | 0    | 0    | 0    | 0    | 0  | 0    | 0  | 0    | 0  | 0    | 0  | 0    | 0  | 0    | 0  | 0    |    |   |  |  |  |
| 73.0              | 0       | 0    | 0    | 100  | 0    | 0    | 0    | 0    | 0    | 0    | 0    | 0  | 0    | 0  | 0    | 0  | 0    | 0  | 0    | 0  | 0    | 0  | 0    |    |   |  |  |  |
| 86.1              | 0       | 0    | 0    | 54.7 | 39.3 | 45.3 | 39.3 | 0    | 0    | 0    | 0    | 0  | 0    | 0  | 0    | 0  | 0    | 0  | 0    | 0  | 0    | 0  | 0    |    |   |  |  |  |
| 99.0              | 0       | 0    | 0    | 99.0 | 58.9 | 39.2 | 39.2 | 0    | 0    | 0    | 0    | 0  | 0    | 0  | 0    | 0  | 0    | 0  | 0    | 0  | 0    | 0  | 0    |    |   |  |  |  |
| 112.1             | 0       | 0    | 0    | 0    | 0    | 94.9 | 39.2 | 0    | 0    | 0    | 0    | 0  | 0    | 0  | 0    | 0  | 0    | 0  | 0    | 0  | 0    | 0  | 0    |    |   |  |  |  |
| 125.1             | 0       | 0    | 0    | 0    | 0    | 91.3 | 10.2 | 5.1  | 5.1  | 0    | 0    | 0  | 0    | 0  | 0    | 0  | 0    | 0  | 0    | 0  | 0    | 0  | 0    |    |   |  |  |  |
| 147.2             | 0       | 0    | 0    | 0    | 0    | 8.8  | 10.2 | 8.8  | 10.2 | 0    | 0    | 0  | 0    | 0  | 0    | 0  | 0    | 0  | 0    | 0  | 0    | 0  | 0    |    |   |  |  |  |
| 169.0             | 0       | 0    | 0    | 0    | 0    | 96.1 | 6.8  | 96.1 | 6.8  | 0    | 0    | 0  | 0    | 0  | 0    | 0  | 0    | 0  | 0    | 0  | 0    | 0  | 0    |    |   |  |  |  |
| 191.1             | 0       | 0    | 0    | 0    | 0    | 14.1 | 24.4 | 54   | 37.1 | 31.9 | 23.5 | 0  | 0    | 0  | 0    | 0  | 0    | 0  | 0    | 0  | 0    | 0  | 0    |    |   |  |  |  |
| 213.1             | 0       | 0    | 0    | 0    | 0    | 3.1  | 5.4  | 23.4 | 17.1 | 73.4 | 42.5 | 0  | 0    | 0  | 0    | 0  | 0    | 0  | 0    | 0  | 0    | 0  | 0    |    |   |  |  |  |
| 235.1             | 0       | 0    | 0    | 0    | 0    | 0    | 0    | 3.1  | 3.1  | 96.9 | 3.1  | 0  | 0    | 0  | 0    | 0  | 0    | 0  | 0    | 0  | 0    | 0  | 0    |    |   |  |  |  |
| 259.0             | 0       | 0    | 0    | 0    | 0    | 0    | 0    | 0    | 0    | 0    | 0    | 0  | 0    | 0  | 0    | 0  | 0    | 0  | 0    | 0  | 0    | 0  | 0    |    |   |  |  |  |
| 347.0             | 0       | 0    | 0    | 0    | 0    | 0    | 0    | 0    | 0    | 0    | 0    | 0  | 0    | 0  | 0    | 0  | 0    | 0  | 0    | 0  | 0    | 0  | 0    |    |   |  |  |  |
| 402.0             | 0       | 0    | 0    | 0    | 0    | 0    | 0    | 0    | 0    | 0    | 0    | 0  | 0    | 0  | 0    | 0  | 0    | 0  | 0    | 0  | 0    | 0  | 0    |    |   |  |  |  |
| 458.9             | 0       | 0    | 0    | 0    | 0    | 0    | 0    | 0    | 0    | 0    | 0    | 0  | 0    | 0  | 0    | 0  | 0    | 0  | 0    | 0  | 0    | 0  | 0    |    |   |  |  |  |
| 523.0             | 0       | 0    | 0    | 0    | 0    | 0    | 0    | 0    | 0    | 0    | 0    | 0  | 0    | 0  | 0    | 0  | 0    | 0  | 0    | 0  | 0    | 0  | 0    |    |   |  |  |  |
| 523.0             | 0       | 0    | 0    | 0    | 0    | 0    | 0    | 0    | 0    | 0    | 0    | 0  | 0    | 0  | 0    | 0  | 0    | 0  | 0    | 0  | 0    | 0  | 0    |    |   |  |  |  |
| 523.0             | 0       | 0    | 0    | 0    | 0    | 0    | 0    | 0    | 0    | 0    | 0    | 0  | 0    | 0  | 0    | 0  | 0    | 0  | 0    | 0  | 0    | 0  | 0    |    |   |  |  |  |
| 523.0             | 0       | 0    | 0    | 0    | 0    | 0    | 0    | 0    | 0    | 0    | 0    | 0  | 0    | 0  | 0    | 0  | 0    | 0  | 0    | 0  | 0    | 0  | 0    |    |   |  |  |  |
| 523.0             | 0       | 0    | 0    | 0    | 0    | 0    | 0    | 0    | 0    | 0    | 0    | 0  | 0    | 0  | 0    | 0  | 0    | 0  | 0    | 0  | 0    | 0  | 0    |    |   |  |  |  |
| 523.0             | 0       | 0    | 0    | 0    | 0    | 0    | 0    | 0    | 0    | 0    | 0    | 0  | 0    | 0  | 0    | 0  | 0    | 0  | 0    | 0  | 0    | 0  | 0    |    |   |  |  |  |
| 523.0             | 0       | 0    | 0    | 0    | 0    | 0    | 0    | 0    | 0    | 0    | 0    | 0  | 0    | 0  | 0    | 0  | 0    | 0  | 0    | 0  | 0    | 0  | 0    |    |   |  |  |  |
| 523.0             | 0       | 0    | 0    | 0    | 0    | 0    | 0    | 0    | 0    | 0    | 0    | 0  | 0    | 0  | 0    | 0  | 0    | 0  | 0    | 0  | 0    | 0  | 0    |    |   |  |  |  |
| 523.0             | 0       | 0    | 0    | 0    | 0    | 0    | 0    | 0    | 0    | 0    | 0    | 0  | 0    | 0  | 0    | 0  | 0    | 0  | 0    | 0  | 0    | 0  | 0    |    |   |  |  |  |
| 523.0             | 0       | 0    | 0    | 0    | 0    | 0    | 0    | 0    | 0    | 0    | 0    | 0  | 0    | 0  | 0    | 0  | 0    | 0  | 0    | 0  | 0    | 0  | 0    |    |   |  |  |  |
| 523.0             | 0       | 0    | 0    | 0    | 0    | 0    | 0    | 0    | 0    | 0    | 0    | 0  | 0    | 0  | 0    | 0  | 0    | 0  | 0    | 0  | 0    | 0  | 0    |    |   |  |  |  |
| 523.0             | 0       | 0    | 0    | 0    | 0    | 0    | 0    | 0    | 0    | 0    | 0    | 0  | 0    | 0  | 0    | 0  | 0    | 0  | 0    | 0  | 0    | 0  | 0    |    |   |  |  |  |
| 523.0             | 0       | 0    | 0    | 0    | 0    | 0    | 0    | 0    | 0    | 0    | 0    | 0  | 0    | 0  | 0    | 0  | 0    | 0  | 0    | 0  | 0    | 0  | 0    |    |   |  |  |  |
| 523.0             | 0       | 0    | 0    | 0    | 0    | 0    | 0    | 0    | 0    | 0    | 0    | 0  | 0    | 0  | 0    | 0  | 0    | 0  | 0    | 0  | 0    | 0  | 0    |    |   |  |  |  |
| 523.0             | 0       | 0    | 0    | 0    | 0    | 0    | 0    | 0    | 0    | 0    | 0    | 0  | 0    | 0  | 0    | 0  | 0    | 0  | 0    | 0  | 0    | 0  | 0    |    |   |  |  |  |
| 523.0             | 0       | 0    | 0    | 0    | 0    | 0    | 0    | 0    | 0    | 0    | 0    | 0  | 0    | 0  | 0    | 0  | 0    | 0  | 0    | 0  | 0    | 0  | 0    |    |   |  |  |  |
| 523.0             | 0       | 0    | 0    | 0    | 0    | 0    | 0    | 0    | 0    | 0    | 0    | 0  | 0    | 0  | 0    | 0  | 0    | 0  | 0    | 0  | 0    | 0  | 0    |    |   |  |  |  |
| 523.0             | 0       | 0    | 0    | 0    | 0    | 0    | 0    | 0    | 0    | 0    | 0    | 0  | 0    | 0  | 0    | 0  | 0    | 0  | 0    | 0  | 0    | 0  | 0    |    |   |  |  |  |
| 523.0             | 0       | 0    | 0    | 0    | 0    | 0    | 0    | 0    | 0    | 0    | 0    | 0  | 0    | 0  | 0    | 0  | 0    | 0  | 0    | 0  | 0    | 0  | 0    |    |   |  |  |  |
| 523.0             | 0       | 0    | 0    | 0    | 0    | 0    | 0    | 0    | 0    | 0    | 0    | 0  | 0    | 0  | 0    | 0  | 0    | 0  | 0    | 0  | 0    | 0  | 0    |    |   |  |  |  |
| 523.0             | 0       | 0    | 0    | 0    | 0    | 0    | 0    | 0    | 0    | 0    | 0    | 0  | 0    | 0  | 0    | 0  | 0    | 0  | 0    | 0  | 0    | 0  | 0    |    |   |  |  |  |
| 523.0             | 0       | 0    | 0    | 0    | 0    | 0    | 0    | 0    | 0    | 0    | 0    | 0  | 0    | 0  | 0    | 0  | 0    | 0  | 0    | 0  | 0    | 0  | 0    |    |   |  |  |  |
| 523.0             | 0       | 0    | 0    | 0    | 0    | 0    | 0    | 0    | 0    | 0    | 0    | 0  | 0    | 0  | 0    | 0  | 0    | 0  | 0    | 0  | 0    | 0  | 0    |    |   |  |  |  |
| 523.0             | 0       | 0    | 0    | 0    | 0    | 0    | 0    | 0    | 0    | 0    | 0    | 0  | 0    | 0  | 0    | 0  | 0    | 0  | 0    | 0  | 0    | 0  | 0    |    |   |  |  |  |
| 523.0             | 0       | 0    | 0    | 0    | 0    | 0    | 0    | 0    | 0    | 0    | 0    | 0  | 0    | 0  | 0    | 0  | 0    | 0  | 0    | 0  | 0    | 0  | 0    |    |   |  |  |  |
| 523.0             | 0       | 0    | 0    | 0    | 0    | 0    | 0    | 0    | 0    | 0    | 0    | 0  | 0    | 0  | 0    | 0  | 0    | 0  | 0    | 0  | 0    | 0  | 0    |    |   |  |  |  |
| 523.0             | 0       | 0    | 0    | 0    | 0    | 0    | 0    | 0    | 0    | 0    | 0    | 0  | 0    | 0  | 0    | 0  | 0    | 0  | 0    | 0  | 0    | 0  | 0    |    |   |  |  |  |
| 523.0             | 0       | 0    | 0    | 0    | 0    | 0    | 0    | 0    | 0    | 0    | 0    | 0  | 0    | 0  | 0    | 0  | 0    | 0  | 0    | 0  | 0    | 0  | 0    |    |   |  |  |  |
| 523.0             | 0       | 0    | 0    | 0    | 0    | 0    | 0    | 0    | 0    | 0    | 0    | 0  | 0    | 0  | 0    | 0  | 0    | 0  | 0    | 0  | 0    | 0  | 0    |    |   |  |  |  |
| 523.0             | 0       | 0    | 0    | 0    | 0    | 0    | 0    | 0    | 0    | 0    | 0    | 0  | 0    | 0  | 0    | 0  | 0    | 0  | 0    | 0  | 0    | 0  | 0    |    |   |  |  |  |
| 523.0             | 0       | 0    | 0    | 0    | 0    | 0    | 0    | 0    | 0    | 0    | 0    | 0  | 0    | 0  | 0    | 0  | 0    | 0  | 0    | 0  | 0    | 0  | 0    |    |   |  |  |  |
| 523.0             | 0       | 0    | 0    | 0    | 0    | 0    | 0    | 0    | 0    | 0    | 0    | 0  | 0    | 0  | 0    | 0  | 0    | 0  | 0    | 0  | 0    | 0  | 0    |    |   |  |  |  |
| 523.0             | 0       | 0    | 0    | 0    | 0    | 0    | 0    | 0    | 0    | 0    | 0    | 0  | 0    | 0  | 0    | 0  | 0    | 0  | 0    | 0  | 0    | 0  | 0    |    |   |  |  |  |
| 523.0             | 0       | 0    | 0    | 0    | 0    | 0    | 0    | 0    | 0    | 0    | 0    | 0  | 0    | 0  | 0    | 0  | 0    | 0  | 0    | 0  | 0    | 0  | 0    |    |   |  |  |  |
| 523.0             | 0       | 0    | 0    | 0    | 0    | 0    | 0    | 0    | 0    | 0    | 0    | 0  | 0    | 0  | 0    | 0  | 0    | 0  | 0    | 0  | 0    | 0  | 0    |    |   |  |  |  |
| 523.0             | 0       | 0    | 0    | 0    | 0    | 0    | 0    | 0    | 0    | 0    | 0    | 0  | 0    | 0  | 0    | 0  | 0    | 0  | 0    | 0  | 0    | 0  | 0    |    |   |  |  |  |
| 523.0             | 0       | 0    | 0    | 0    | 0    | 0    | 0    | 0    | 0    | 0    | 0    | 0  | 0    | 0  | 0    | 0  | 0    | 0  | 0    | 0  | 0    | 0  | 0    |    |   |  |  |  |
| 523.0             | 0       | 0    | 0    | 0    | 0    | 0    | 0    | 0    | 0    | 0    | 0    | 0  | 0    | 0  | 0    | 0  | 0    | 0  | 0    | 0  | 0    | 0  | 0    |    |   |  |  |  |
| 523.0             | 0       | 0    | 0    | 0    | 0    | 0    | 0    | 0    | 0    | 0    | 0    | 0  | 0    | 0  | 0    | 0  | 0    | 0  | 0    | 0  | 0    | 0  | 0    |    |   |  |  |  |
| 523.0             | 0       | 0    | 0    | 0    | 0    | 0    | 0    | 0    | 0    | 0    | 0    | 0  | 0    | 0  | 0    | 0  | 0    | 0  | 0    | 0  | 0    | 0  | 0    |    |   |  |  |  |
| 523.0             | 0       | 0    | 0    | 0    | 0    | 0    | 0    | 0    | 0    | 0    | 0    | 0  | 0    | 0  | 0    | 0  | 0    | 0  | 0    | 0  | 0    | 0  | 0    |    |   |  |  |  |
| 523.0             | 0       | 0    | 0    | 0    | 0    | 0    | 0    | 0    | 0    | 0    | 0    | 0  | 0    | 0  | 0    | 0  | 0    | 0  | 0    | 0  | 0    | 0  | 0    |    |   |  |  |  |
| 523.0             | 0       | 0    | 0    | 0    | 0    | 0    | 0    | 0    | 0    | 0    | 0    | 0  | 0    | 0  | 0    | 0  | 0    | 0  | 0    | 0  | 0    | 0  | 0    |    |   |  |  |  |
| 523.0             | 0       | 0    | 0    | 0    | 0    | 0    | 0    | 0    | 0    | 0    | 0    | 0  | 0    | 0  | 0    | 0  | 0    | 0  | 0    | 0  | 0    | 0  | 0    |    |   |  |  |  |
| 523.0             | 0       | 0    | 0    | 0    | 0    | 0    | 0    | 0    | 0    | 0    | 0    | 0  | 0    | 0  | 0    | 0  | 0    | 0  | 0    | 0  | 0    | 0  | 0    |    |   |  |  |  |
| 523.0             | 0       | 0    | 0    | 0    | 0    | 0    | 0    | 0    | 0    | 0    | 0    | 0  | 0    | 0  | 0    | 0  | 0    | 0  | 0    | 0  | 0    | 0  | 0    |    |   |  |  |  |
| 523.0             | 0       | 0    | 0    | 0    | 0    | 0    | 0    | 0    | 0    | 0    | 0    | 0  | 0    | 0  | 0    | 0  | 0    | 0  | 0    | 0  | 0    | 0  | 0    |    |   |  |  |  |
| 523.0             | 0       | 0    | 0    | 0    | 0    | 0    | 0    | 0    | 0    | 0    | 0    | 0  | 0    | 0  | 0    | 0  | 0    | 0  | 0    | 0  | 0    | 0  | 0    |    |   |  |  |  |
| 523.0             | 0       | 0    | 0    | 0    | 0    | 0    | 0    | 0    | 0    | 0    | 0    | 0  | 0    | 0  | 0    | 0  | 0    | 0  | 0    | 0  | 0    | 0  | 0    |    |   |  |  |  |
| 523.0             | 0       | 0    | 0    | 0    | 0    | 0    | 0    | 0    | 0    | 0    | 0    | 0  | 0    | 0  | 0    | 0  | 0    | 0  | 0    | 0  | 0    | 0  | 0    |    |   |  |  |  |
| 523.0             | 0       | 0    | 0    | 0    | 0    | 0    | 0    | 0    | 0    | 0    | 0    | 0  | 0    | 0  | 0    | 0  | 0    | 0  | 0    | 0  | 0    | 0  | 0    |    |   |  |  |  |
| 523.0             | 0       | 0    | 0    | 0    | 0    | 0    | 0    | 0    | 0    | 0    | 0    | 0  | 0    | 0  | 0    | 0  | 0    | 0  | 0    | 0  | 0    | 0  | 0    |    |   |  |  |  |
| 523.0             | 0       | 0    | 0    | 0    | 0    | 0    | 0    | 0    | 0    | 0    | 0    | 0  | 0    | 0  | 0    | 0  | 0    | 0  | 0    | 0  | 0    | 0  | 0    |    |   |  |  |  |
| 523.0             | 0       | 0    | 0    | 0    | 0    | 0    | 0    | 0    | 0    | 0    | 0    | 0  | 0    | 0  | 0    | 0  | 0    | 0  | 0    |    |      |    |      |    |   |  |  |  |

*P. regina* 25.0° C.

[illegible]

*P. regina* 27.5° C.

| P. regina 27.5° C |  |      |    |      |      |      |      |      |      |      |      |      |     |                     |     |                              |    |  |  |
|-------------------|--|------|----|------|------|------|------|------|------|------|------|------|-----|---------------------|-----|------------------------------|----|--|--|
| Dataset           |  |      |    |      |      |      |      |      |      |      |      |      |     |                     |     |                              |    |  |  |
| Time              |  | egg  |    | L1   |      | L2   |      | L3f  |      | L3m  |      | P    |     | Cumulative Gaussian |     | Reversed Cumulative Gaussian |    |  |  |
|                   |  | Mean | SE | Mean | SE   | Mean | SE   | Mean | SE   | Mean | SE   | Mean | SE  | Mean                | SE  | Mean                         | SE |  |  |
| 0                 |  | 100  | 0  | 0    | 0    | 0    | 0    | 0    | 0    | 0    | 0    | 0    | 0   | 0                   | 0   | 0                            | 0  |  |  |
| 2.0               |  | 100  | 0  | 0    | 0    | 0    | 0    | 0    | 0    | 0    | 0    | 0    | 0   | 0                   | 0   | 0                            | 0  |  |  |
| 4.0               |  | 100  | 0  | 0    | 0    | 0    | 0    | 0    | 0    | 0    | 0    | 0    | 0   | 0                   | 0   | 0                            | 0  |  |  |
| 6.1               |  | 100  | 0  | 0    | 0    | 0    | 0    | 0    | 0    | 0    | 0    | 0    | 0   | 0                   | 0   | 0                            | 0  |  |  |
| 8.1               |  | 100  | 0  | 0    | 0    | 0    | 0    | 0    | 0    | 0    | 0    | 0    | 0   | 0                   | 0   | 0                            | 0  |  |  |
| 10.1              |  | 100  | 0  | 0    | 0    | 0    | 0    | 0    | 0    | 0    | 0    | 0    | 0   | 0                   | 0   | 0                            | 0  |  |  |
| 16.2              |  | 0    | 0  | 100  | 0    | 0    | 0    | 0    | 0    | 0    | 0    | 0    | 0   | 0                   | 0   | 0                            | 0  |  |  |
| 22.2              |  | 0    | 0  | 100  | 0    | 0    | 0    | 0    | 0    | 0    | 0    | 0    | 0   | 0                   | 0   | 0                            | 0  |  |  |
| 29.1              |  | 0    | 0  | 100  | 0    | 0    | 0    | 0    | 0    | 0    | 0    | 0    | 0   | 0                   | 0   | 0                            | 0  |  |  |
| 34.2              |  | 0    | 0  | 17.7 | 12.7 | 82.3 | 12.7 | 0    | 0    | 0    | 0    | 0    | 0   | 0                   | 0   | 0                            | 0  |  |  |
| 40.1              |  | 0    | 0  | 0    | 0    | 100  | 0    | 0    | 0    | 0    | 0    | 0    | 0   | 0                   | 0   | 0                            | 0  |  |  |
| 49.1              |  | 0    | 0  | 0    | 0    | 0    | 0    | 0    | 0    | 0    | 0    | 0    | 0   | 0                   | 0   | 0                            | 0  |  |  |
| 59.0              |  | 0    | 0  | 0    | 0    | 0    | 0    | 0    | 0    | 0    | 0    | 0    | 0   | 0                   | 0   | 0                            | 0  |  |  |
| 67.2              |  | 0    | 0  | 0    | 0    | 1.3  | 2.3  | 98.7 | 2.3  | 0    | 0    | 0    | 0   | 0                   | 0   | 0                            | 0  |  |  |
| 76.3              |  | 0    | 0  | 0    | 0    | 0    | 0    | 100  | 0    | 0    | 0    | 0    | 0   | 0                   | 0   | 0                            | 0  |  |  |
| 85.1              |  | 0    | 0  | 0    | 0    | 0    | 0    | 98.1 | 2.6  | 0    | 0    | 0    | 0   | 0                   | 0   | 0                            | 0  |  |  |
| 101.1             |  | 0    | 0  | 0    | 0    | 0    | 0    | 55.3 | 44.7 | 44.7 | 44.7 | 0    | 0   | 0                   | 0   | 0                            | 0  |  |  |
| 117.1             |  | 0    | 0  | 0    | 0    | 0    | 0    | 40.9 | 38   | 59.1 | 38   | 20.5 | 25  | 20.5                | 25  | 0                            | 0  |  |  |
| 133.1             |  | 0    | 0  | 0    | 0    | 0    | 0    | 0    | 0    | 5.6  | 5.7  | 94.4 | 5.7 | 94.4                | 5.7 | 0                            | 0  |  |  |
| 164.8             |  | 0    | 0  | 0    | 0    | 0    | 0    | 0    | 0    | 0    | 0    | 0    | 0   | 0                   | 0   | 0                            | 0  |  |  |
| 205.1             |  | 0    | 0  | 0    | 0    | 0    | 0    | 0    | 0    | 0    | 0    | 0    | 0   | 0                   | 0   | 0                            | 0  |  |  |
| 245.0             |  | 0    | 0  | 0    | 0    | 0    | 0    | 0    | 0    | 0    | 0    | 0    | 0   | 0                   | 0   | 0                            | 0  |  |  |
| 265.0             |  | 0    | 0  | 0    | 0    | 0    | 0    | 0    | 0    | 0    | 0    | 0    | 0   | 0                   | 0   | 0                            | 0  |  |  |
| 325.0             |  | 0    | 0  | 0    | 0    | 0    | 0    | 0    | 0    | 0    | 0    | 0    | 0   | 0                   | 0   | 0                            | 0  |  |  |
| 325.0             |  | 0    | 0  | 0    | 0    | 0    | 0    | 0    | 0    | 0    | 0    | 0    | 0   | 0                   | 0   | 0                            | 0  |  |  |
| 325.0             |  | 0    | 0  | 0    | 0    | 0    | 0    | 0    | 0    | 0    | 0    | 0    | 0   | 0                   | 0   | 0                            | 0  |  |  |
| 461.0             |  | 0    | 0  | 0    | 0    | 0    | 0    | 0    | 0    | 0    | 0    | 0    | 0   | 0                   | 0   | 0                            | 0  |  |  |
|                   |  |      |    |      |      |      |      |      |      |      |      |      |     |                     |     |                              |    |  |  |
|                   |  |      |    |      |      |      |      |      |      |      |      |      |     |                     |     |                              |    |  |  |
|                   |  |      |    |      |      |      |      |      |      |      |      |      |     |                     |     |                              |    |  |  |
|                   |  |      |    |      |      |      |      |      |      |      |      |      |     |                     |     |                              |    |  |  |
|                   |  |      |    |      |      |      |      |      |      |      |      |      |     |                     |     |                              |    |  |  |
|                   |  |      |    |      |      |      |      |      |      |      |      |      |     |                     |     |                              |    |  |  |
|                   |  |      |    |      |      |      |      |      |      |      |      |      |     |                     |     |                              |    |  |  |
|                   |  |      |    |      |      |      |      |      |      |      |      |      |     |                     |     |                              |    |  |  |
|                   |  |      |    |      |      |      |      |      |      |      |      |      |     |                     |     |                              |    |  |  |
|                   |  |      |    |      |      |      |      |      |      |      |      |      |     |                     |     |                              |    |  |  |
|                   |  |      |    |      |      |      |      |      |      |      |      |      |     |                     |     |                              |    |  |  |
|                   |  |      |    |      |      |      |      |      |      |      |      |      |     |                     |     |                              |    |  |  |
|                   |  |      |    |      |      |      |      |      |      |      |      |      |     |                     |     |                              |    |  |  |
|                   |  |      |    |      |      |      |      |      |      |      |      |      |     |                     |     |                              |    |  |  |
|                   |  |      |    |      |      |      |      |      |      |      |      |      |     |                     |     |                              |    |  |  |
|                   |  |      |    |      |      |      |      |      |      |      |      |      |     |                     |     |                              |    |  |  |
|                   |  |      |    |      |      |      |      |      |      |      |      |      |     |                     |     |                              |    |  |  |
|                   |  |      |    |      |      |      |      |      |      |      |      |      |     |                     |     |                              |    |  |  |
|                   |  |      |    |      |      |      |      |      |      |      |      |      |     |                     |     |                              |    |  |  |
|                   |  |      |    |      |      |      |      |      |      |      |      |      |     |                     |     |                              |    |  |  |
|                   |  |      |    |      |      |      |      |      |      |      |      |      |     |                     |     |                              |    |  |  |
|                   |  |      |    |      |      |      |      |      |      |      |      |      |     |                     |     |                              |    |  |  |
|                   |  |      |    |      |      |      |      |      |      |      |      |      |     |                     |     |                              |    |  |  |
|                   |  |      |    |      |      |      |      |      |      |      |      |      |     |                     |     |                              |    |  |  |
|                   |  |      |    |      |      |      |      |      |      |      |      |      |     |                     |     |                              |    |  |  |
|                   |  |      |    |      |      |      |      |      |      |      |      |      |     |                     |     |                              |    |  |  |
|                   |  |      |    |      |      |      |      |      |      |      |      |      |     |                     |     |                              |    |  |  |
|                   |  |      |    |      |      |      |      |      |      |      |      |      |     |                     |     |                              |    |  |  |
|                   |  |      |    |      |      |      |      |      |      |      |      |      |     |                     |     |                              |    |  |  |
|                   |  |      |    |      |      |      |      |      |      |      |      |      |     |                     |     |                              |    |  |  |
|                   |  |      |    |      |      |      |      |      |      |      |      |      |     |                     |     |                              |    |  |  |
|                   |  |      |    |      |      |      |      |      |      |      |      |      |     |                     |     |                              |    |  |  |

[illegible]



[illegible]

## Supplementary Materials S6

Datasets and statistical analysis summary of *Phormia regina* nonlinear regressions for 50% stage transition by temperature. Regression equation:

$$y = 100/(1+10^{((\text{LogEC50}-x)*\text{HillSlope}))}$$

where x = time (log time) and y = percent in stage. Where “interrupted” is indicated on a regression, data were insufficient to fit a curve (typically this means we obtained too few points in measuring portions of the transition curve). Where “ambiguous” is indicated on a regression, the program could not reach a final solution by iterative (numerical) methods.. The analysis is from GraphPad Prism 6.0 which uses the Marquardt and Levenberg approach for non-linear regression.

*P. regina* 10° C.

| <i>P. regina</i> 10.0° C                              |                 | L1        | L2       | L3f       | L3m      | P     | A    |
|-------------------------------------------------------|-----------------|-----------|----------|-----------|----------|-------|------|
| log(agonist) vs. normalized response – Variable slope |                 |           |          |           |          |       |      |
| Best-fit values                                       |                 |           |          |           |          |       |      |
| LogEC50                                               | 2.239           |           |          |           |          |       |      |
| HillSlope                                             | 3.016           |           |          |           |          |       |      |
| EC50                                                  | 173.3           |           |          |           |          |       |      |
| Std. Error                                            |                 |           |          |           |          |       |      |
| LogEC50                                               | 0.03211         |           |          |           |          |       |      |
| HillSlope                                             | 0.6061          |           |          |           |          |       |      |
| 95% Confidence Intervals                              |                 |           |          |           |          |       |      |
| LogEC50                                               | 2.167 to 2.310  |           |          |           |          |       |      |
| HillSlope                                             | 1.666 to 4.367  |           |          |           |          |       |      |
| EC50                                                  | 147.0 to 204.4  |           |          |           |          |       |      |
| Goodness of Fit                                       |                 |           |          |           |          |       |      |
| Degrees of Freedom                                    | 10              |           |          |           |          |       |      |
| R square                                              | 0.9431          |           |          |           |          |       |      |
| Absolute Sum of Squares                               | 1056            |           |          |           |          |       |      |
| Sy.x                                                  | 10.28           |           |          |           |          |       |      |
| Runs test                                             |                 |           |          |           |          |       |      |
| Points above curve                                    | 6               |           |          |           |          |       |      |
| Points below curve                                    | 6               |           |          |           |          |       |      |
| Number of runs                                        | 4               |           |          |           |          |       |      |
| P value (runs test)                                   | 0.0671          |           |          |           |          |       |      |
| Deviation from Model                                  | Not Significant |           |          |           |          |       |      |
| Number of points                                      | 12              |           |          |           |          |       |      |
| Analyzed                                              | LogEC50         | SE        | Value    | HillSlope | SE       | Value | EC50 |
| 1                                                     | Value           |           |          |           |          |       |      |
|                                                       | 2.23884         | 0.0321147 | 3.016366 | 0.6061186 | 173.3166 |       |      |

*P. regina* 12.5° C.

| <i>P. regina</i> 12.5° C                              |                          | Dataset         |                                 |                 |                 |          |     |           |       |                                                                          |  |
|-------------------------------------------------------|--------------------------|-----------------|---------------------------------|-----------------|-----------------|----------|-----|-----------|-------|--------------------------------------------------------------------------|--|
| log(agonist) vs. normalized response – Variable slope |                          | L1              | L2                              | L3f             | Interrupted     | L3m      | P   | Ambiguous | A     | * starred and italicized data points were excluded from final regression |  |
|                                                       |                          | L1              | L2                              | L3f             | L2              | L3f      | L3m | P         | A     | log(time)                                                                |  |
| LogEC50                                               | Best-fit values          | 1.846           | 2.549                           | 2.762           | 2.787 ~ 2.926   |          |     |           | 3.162 |                                                                          |  |
| HillSlope                                             |                          | 4.816           | 154.6                           | 7.75            | 225.4 ~ 197.2   |          |     |           |       |                                                                          |  |
| EC50                                                  |                          | 70.17           | 354.3                           | 564.3           | 612.5 ~ 843.8   |          |     |           |       |                                                                          |  |
| LogEC50                                               | Std. Error               | 0.01104         | 183.4                           | 0.0292          | ~ 32135         |          |     |           |       |                                                                          |  |
| HillSlope                                             |                          | 0.6154          | 738186                          | 3.742           | ~ 1.790e+009    |          |     |           |       |                                                                          |  |
| LogEC50                                               | 95% Confidence Intervals |                 |                                 |                 |                 |          |     |           |       |                                                                          |  |
| HillSlope                                             |                          | 1.818 to 1.875  | -406.2 to 411.3                 | 2.689 to 2.814  | (Very wide)     |          |     |           |       |                                                                          |  |
| EC50                                                  |                          | 3.234 to 6.398  | -1.645e+006 to -0.2765 to 15.78 |                 | (Very wide)     |          |     |           |       |                                                                          |  |
|                                                       |                          | 65.73 to 74.91  | 0.0 to +infinity                | 488.5 to 651.8  | (Very wide)     |          |     |           |       |                                                                          |  |
| Degrees of Freedom                                    | Goodness of Fit          | 5               | 10                              | 14              |                 |          |     |           |       |                                                                          |  |
| R square                                              |                          | 0.9917          | 0.9331                          | 0.6585          | 0.9943          | 17       |     |           |       |                                                                          |  |
| Absolute Sum of Squares                               |                          | 93.58           | 1109                            | 5924            | 100             |          |     |           |       |                                                                          |  |
| Sy.x                                                  |                          | 4.326           | 10.53                           | 20.57           | 2.425           |          |     |           |       |                                                                          |  |
| Points above curve                                    | Runs test                | 3               | 3                               | 2               |                 |          |     |           |       |                                                                          |  |
| Points below curve                                    |                          | 4               | 9                               | 14              | 15              |          |     |           |       |                                                                          |  |
| Number of runs                                        |                          | 4               | 4                               | 4               | 4               |          |     |           |       |                                                                          |  |
| P value (runs test)                                   |                          | 0.5429          | 0.2                             | 0.35            | 0.3309          |          |     |           |       |                                                                          |  |
| Deviation from Model                                  | Not Significant          | Not Significant | Not Significant                 | Not Significant | Not Significant |          |     |           |       |                                                                          |  |
| Number of points                                      |                          |                 |                                 |                 |                 |          |     |           |       |                                                                          |  |
| Analyzed                                              |                          | 7               | 12                              | 16              | 15              | 19       |     |           |       |                                                                          |  |
|                                                       | LogEC50                  | Value           | SE                              | HillSlope       | Value           | SE       |     |           |       |                                                                          |  |
| L1                                                    |                          | 1.846138        | 0.01103809                      | 4.81592         | 0.6153861       | 70.16783 |     |           |       |                                                                          |  |
| L2                                                    |                          | 2.549373        | 183.4421                        | 154.6458        | 738186.2        | 354.3018 |     |           |       |                                                                          |  |
| L3f                                                   |                          | 2.751508        | 0.02919853                      | 7.750142        | 3.742032        | 564.298  |     |           |       |                                                                          |  |
| L3m                                                   |                          | 2.787087        |                                 | 225.4046        |                 | 612.4733 |     |           |       |                                                                          |  |
| P                                                     |                          | 2.926265        | 32135.05                        | 197.1646        | 1789980000      | 843.8491 |     |           |       |                                                                          |  |
| A                                                     |                          | 3.161667        |                                 | 1688.087        |                 | 1450.999 |     |           |       |                                                                          |  |

*P. regina* 15.0° C.

| P. regina 15.0° C                                    |                 |             |                 | Dataset                                                                 |                 |                |  |  |  |  |  |  |  |
|------------------------------------------------------|-----------------|-------------|-----------------|-------------------------------------------------------------------------|-----------------|----------------|--|--|--|--|--|--|--|
| log(algost) vs. normalized response – Variable slope |                 |             |                 | * stated and italicized data points were excluded from final regression |                 |                |  |  |  |  |  |  |  |
|                                                      | L1              | L2          | L3f             | L3m                                                                     | P               | A              |  |  |  |  |  |  |  |
|                                                      | Best-fit values |             |                 |                                                                         |                 |                |  |  |  |  |  |  |  |
|                                                      | Interrupted     |             |                 |                                                                         |                 |                |  |  |  |  |  |  |  |
| LogEC50                                              | 1.788           | 2.188       | 2.363           | 2.649                                                                   | 2.671           | 2.985          |  |  |  |  |  |  |  |
| HiLSlope                                             | 5.514           | 149.3       | 11.39           | 11.57                                                                   | 11.83           | 6.461          |  |  |  |  |  |  |  |
| EC50                                                 | 61.37           | 154.1       | 230.7           | 445.9                                                                   | 468.6           | 965.9          |  |  |  |  |  |  |  |
| Std. Error                                           |                 |             |                 |                                                                         |                 |                |  |  |  |  |  |  |  |
| LogEC50                                              | 0.01726         |             | 0.00533         | 0.001803                                                                | 0.00275         | 0.01478        |  |  |  |  |  |  |  |
| HiLSlope                                             | 1.192           |             | 1.404           | 0.4474                                                                  | 0.7589          | 1.27           |  |  |  |  |  |  |  |
| 95% Confidence Intervals                             |                 |             |                 |                                                                         |                 |                |  |  |  |  |  |  |  |
| LogEC50                                              | 1.747 to 1.829  |             | 2.352 to 2.375  | 2.645 to 2.653                                                          | 2.665 to 2.677  | 2.954 to 3.015 |  |  |  |  |  |  |  |
| HiLSlope                                             | 2.694 to 8.333  |             | 8.356 to 14.42  | 10.62 to 12.52                                                          | 10.25 to 13.42  | 3.841 to 9.082 |  |  |  |  |  |  |  |
| EC50                                                 | 55.87 to 67.42  |             | 224.7 to 236.9  | 442.0 to 449.9                                                          | 462.4 to 474.9  | 900.4 to 1036  |  |  |  |  |  |  |  |
| Goodness of Fit                                      |                 |             |                 |                                                                         |                 |                |  |  |  |  |  |  |  |
| Degrees of Freedom                                   | 7               |             | 13              | 15                                                                      | 19              | 24             |  |  |  |  |  |  |  |
| R square                                             | 0.9861          |             | 0.9834          | 0.9977                                                                  | 0.9939          | 0.9134         |  |  |  |  |  |  |  |
| Absolute Sum of Squares                              | 216.3           |             | 274.9           | 2.042                                                                   | 129.3           | 2071           |  |  |  |  |  |  |  |
| Sy, x                                                | 5.559           |             | 4.599           | 0.369                                                                   | 2.608           | 9.289          |  |  |  |  |  |  |  |
| Runs test                                            |                 |             |                 |                                                                         |                 |                |  |  |  |  |  |  |  |
| Points above curve                                   | 3               |             | 2               | 1                                                                       | 3               | 3              |  |  |  |  |  |  |  |
| Points below curve                                   | 6               |             | 13              | 16                                                                      | 18              | 23             |  |  |  |  |  |  |  |
| Number of runs                                       | 6               |             | 4               | 3                                                                       | 5               | 4              |  |  |  |  |  |  |  |
| P value (runs test)                                  | 0.881           |             | 0.3714          | 1                                                                       | 0.2842          | 0.0438         |  |  |  |  |  |  |  |
| Deviation from Model                                 | Not Significant |             | Not Significant | Not Significant                                                         | Not Significant | Significant    |  |  |  |  |  |  |  |
| Number of points                                     |                 |             |                 |                                                                         |                 |                |  |  |  |  |  |  |  |
| Analyzed                                             | 9               | 11          | 15              | 17                                                                      | 21              | 26             |  |  |  |  |  |  |  |
| LogEC50                                              |                 |             |                 |                                                                         |                 |                |  |  |  |  |  |  |  |
|                                                      | Value           | SE          | Value           | SE                                                                      | Value           | SE             |  |  |  |  |  |  |  |
| L1                                                   | 1.787964        | 0.01725509  | 5.513623        | 1.192334                                                                | 61.37117        |                |  |  |  |  |  |  |  |
| L2                                                   | 2.187732        |             | 149.3093        |                                                                         | 154.0751        |                |  |  |  |  |  |  |  |
| L3f                                                  | 2.363065        | 0.005330136 | 11.38931        | 1.404045                                                                | 230.7095        |                |  |  |  |  |  |  |  |
| L3m                                                  | 2.649252        | 0.001802544 | 11.56888        | 0.4473526                                                               | 445.9152        |                |  |  |  |  |  |  |  |
| P                                                    | 2.670805        | 0.002750097 | 11.83429        | 0.7589026                                                               | 468.6034        |                |  |  |  |  |  |  |  |
| A                                                    | 2.984917        | 0.01477844  | 6.461477        | 1.269606                                                                | 965.8667        |                |  |  |  |  |  |  |  |
| HiLSlope                                             |                 |             |                 |                                                                         |                 |                |  |  |  |  |  |  |  |
|                                                      | Value           | SE          | Value           | SE                                                                      | Value           | SE             |  |  |  |  |  |  |  |
| L1                                                   | 1.788           |             | 5.513623        |                                                                         | 61.37117        |                |  |  |  |  |  |  |  |
| L2                                                   | 2.188           |             | 149.3093        |                                                                         | 154.0751        |                |  |  |  |  |  |  |  |
| L3f                                                  | 2.363           |             | 11.38931        |                                                                         | 230.7095        |                |  |  |  |  |  |  |  |
| L3m                                                  | 2.649           |             | 11.56888        |                                                                         | 445.9152        |                |  |  |  |  |  |  |  |
| P                                                    | 2.671           |             | 11.83429        |                                                                         | 468.6034        |                |  |  |  |  |  |  |  |
| A                                                    | 2.985           |             | 6.461477        |                                                                         | 965.8667        |                |  |  |  |  |  |  |  |
| EC50                                                 |                 |             |                 |                                                                         |                 |                |  |  |  |  |  |  |  |
|                                                      | Value           | SE          | Value           | SE                                                                      | Value           | SE             |  |  |  |  |  |  |  |
| L1                                                   | 61.37           |             | 55.87 to 67.42  |                                                                         | 55.87 to 67.42  |                |  |  |  |  |  |  |  |
| L2                                                   | 154.1           |             | 149.3 to 154.1  |                                                                         | 149.3 to 154.1  |                |  |  |  |  |  |  |  |
| L3f                                                  | 230.7           |             | 224.7 to 236.9  |                                                                         | 224.7 to 236.9  |                |  |  |  |  |  |  |  |
| L3m                                                  | 445.9           |             | 442.0 to 449.9  |                                                                         | 442.0 to 449.9  |                |  |  |  |  |  |  |  |
| P                                                    | 468.6           |             | 462.4 to 474.9  |                                                                         | 462.4 to 474.9  |                |  |  |  |  |  |  |  |
| A                                                    | 965.9           |             | 900.4 to 1036   |                                                                         | 900.4 to 1036   |                |  |  |  |  |  |  |  |
| log(lims)                                            |                 |             |                 |                                                                         |                 |                |  |  |  |  |  |  |  |
| LogEC50                                              | 0.009485        |             | 0               | 0                                                                       | 0               | 0              |  |  |  |  |  |  |  |
| HiLSlope                                             | 1.206938        |             | 0               | 0                                                                       | 0               | 0              |  |  |  |  |  |  |  |
| EC50                                                 | 1.362692        |             | 0               | 0                                                                       | 0               | 0              |  |  |  |  |  |  |  |
| Std. Error                                           |                 |             |                 |                                                                         |                 |                |  |  |  |  |  |  |  |
| LogEC50                                              | 1.506449        |             | 0               | 0                                                                       | 0               | 0              |  |  |  |  |  |  |  |
| HiLSlope                                             | 1.210185        |             | 10.9            | 0                                                                       | 0               | 0              |  |  |  |  |  |  |  |
| EC50                                                 | 1.793674        |             | 51.7            | 0                                                                       | 0               | 0              |  |  |  |  |  |  |  |
| 95% Confidence Intervals                             |                 |             |                 |                                                                         |                 |                |  |  |  |  |  |  |  |
| LogEC50                                              | 1.930949        |             | 90              | 0                                                                       | 0               | 0              |  |  |  |  |  |  |  |
| HiLSlope                                             | 2.018492        |             | 86.4            | 0                                                                       | 0               | 0              |  |  |  |  |  |  |  |
| EC50                                                 | 2.119492        |             | 100             | 0                                                                       | 0               | 0              |  |  |  |  |  |  |  |
| Goodness of Fit                                      |                 |             |                 |                                                                         |                 |                |  |  |  |  |  |  |  |
| Degrees of Freedom                                   | 2.111375        |             | 5.6             | 0                                                                       | 0               | 0              |  |  |  |  |  |  |  |
| R square                                             | 2.179516        |             | 100             | 0                                                                       | 0               | 0              |  |  |  |  |  |  |  |
| Absolute Sum of Squares                              | 2.257878        |             | 26.7            | 0                                                                       | 0               | 0              |  |  |  |  |  |  |  |
| Sy, x                                                | 2.326626        |             | 72.1            | 0                                                                       | 0               | 0              |  |  |  |  |  |  |  |
| Points above curve                                   | 2.385606        |             | 75              | 0                                                                       | 0               | 0              |  |  |  |  |  |  |  |
| Points below curve                                   | 2.438048        |             | 100             | 0                                                                       | 0               | 0              |  |  |  |  |  |  |  |
| Number of runs                                       | 2.48446         |             | 15.6            | 0                                                                       | 0               | 0              |  |  |  |  |  |  |  |
| P value (runs test)                                  | 2.584223        |             | 27.8            | 0                                                                       | 0               | 0              |  |  |  |  |  |  |  |
| Deviation from Model                                 | 2.613947        |             |                 | 0                                                                       | 0               | 0              |  |  |  |  |  |  |  |
| Number of points                                     | 2.672217        |             |                 | 0                                                                       | 0               | 0              |  |  |  |  |  |  |  |
| Analyzed                                             | 2.720173        |             |                 | 0                                                                       | 0               | 0              |  |  |  |  |  |  |  |
| LogEC50                                              |                 |             |                 |                                                                         |                 |                |  |  |  |  |  |  |  |
|                                                      | Value           | SE          | Value           | SE                                                                      | Value           | SE             |  |  |  |  |  |  |  |
| L1                                                   | 1.787964        | 0.01725509  | 5.513623        | 1.192334                                                                | 61.37117        |                |  |  |  |  |  |  |  |
| L2                                                   | 2.187732        |             | 149.3093        |                                                                         | 154.0751        |                |  |  |  |  |  |  |  |
| L3f                                                  | 2.363065        | 0.005330136 | 11.38931        | 1.404045                                                                | 230.7095        |                |  |  |  |  |  |  |  |
| L3m                                                  | 2.649252        | 0.001802544 | 11.56888        | 0.4473526                                                               | 445.9152        |                |  |  |  |  |  |  |  |
| P                                                    | 2.670805        | 0.002750097 | 11.83429        | 0.7589026                                                               | 468.6034        |                |  |  |  |  |  |  |  |
| A                                                    | 2.984917        | 0.01477844  | 6.461477        | 1.269606                                                                | 965.8667        |                |  |  |  |  |  |  |  |

*P. regina* 17.5° C.

| P. regina 17.5° C                                     |                 |                 |                 |           |             |       |                 |  |   |  |   |  |
|-------------------------------------------------------|-----------------|-----------------|-----------------|-----------|-------------|-------|-----------------|--|---|--|---|--|
| log(agonist) vs. normalized response – Variable slope | L1              |                 | L2              |           | L3f         |       | L3m             |  | P |  | A |  |
|                                                       | Best-fit values |                 |                 |           | Interrupted |       | Interrupted     |  | P |  | A |  |
| LogEC50                                               | 1.602157        | 0.01111563      | 2.104           | 2.338     | 2.443       | 2.503 | 2.794           |  |   |  |   |  |
| HillSlope                                             | 5.903           | 9.675           | 9.675           | 27.91     | 170.5       | 225.5 | 12.23           |  |   |  |   |  |
| EC50                                                  | 40.01           | 126.9           | 126.9           | 217.6     | 277.4       | 318.6 | 622.5           |  |   |  |   |  |
| Std. Error                                            |                 |                 |                 |           |             |       |                 |  |   |  |   |  |
| LogEC50                                               | 0.01112         | 0.005853        |                 |           |             |       | 0.006332        |  |   |  |   |  |
| HillSlope                                             | 0.876           | 1.108           |                 | 0.3524    |             |       | 1.833           |  |   |  |   |  |
| 95% Confidence Intervals                              |                 |                 |                 |           |             |       |                 |  |   |  |   |  |
| LogEC50                                               | 1.576 to 1.628  | 2.091 to 2.116  | 2.337 to 2.339  |           |             |       | 2.781 to 2.807  |  |   |  |   |  |
| HillSlope                                             | 3.831 to 7.975  | 7.260 to 12.09  | 27.16 to 28.67  |           |             |       | 6.444 to 16.01  |  |   |  |   |  |
| EC50                                                  | 37.66 to 42.51  | 123.2 to 130.7  | 217.2 to 218.0  |           |             |       | 604.0 to 641.5  |  |   |  |   |  |
| Goodness of Fit                                       |                 |                 |                 |           |             |       |                 |  |   |  |   |  |
| Degrees of Freedom                                    | 7               | 12              | 14              |           |             |       | 24              |  |   |  |   |  |
| R square                                              | 0.9922          | 0.9889          | 0.9999          |           |             |       | 0.9748          |  |   |  |   |  |
| Absolute Sum of Squares                               | 128.5           | 214             | 0.9392          |           |             |       | 684.5           |  |   |  |   |  |
| Syx                                                   | 4.284           | 4.223           | 0.259           |           |             |       | 5.341           |  |   |  |   |  |
| Runs test                                             |                 |                 |                 |           |             |       |                 |  |   |  |   |  |
| Points above curve                                    | 3               | 3               | 1               |           |             |       | 4               |  |   |  |   |  |
| Points below curve                                    | 6               | 11              | 15              |           |             |       | 22              |  |   |  |   |  |
| Number of runs                                        | 4               | 4               | 3               |           |             |       | 6               |  |   |  |   |  |
| P value (runs test)                                   | 0.3452          | 0.1484          | 1               |           |             |       | 0.1408          |  |   |  |   |  |
| Deviation from Model                                  | Not Significant | Not Significant | Not Significant |           |             |       | Not Significant |  |   |  |   |  |
| Number of points                                      | 9               | 14              | 16              |           |             |       | 20              |  |   |  |   |  |
| Analyzed                                              |                 |                 |                 |           |             |       |                 |  |   |  |   |  |
|                                                       | LogEC50         | SE              | HillSlope       | SE        | EC50        | Value | SE              |  |   |  |   |  |
| L1                                                    | 1.602157        | 0.01111563      | 5.903074        | 0.8760046 | 40.00895    |       |                 |  |   |  |   |  |
| L2                                                    | 2.103514        | 0.005852587     | 9.674705        | 1.10837   | 126.9154    |       |                 |  |   |  |   |  |
| L3f                                                   | 2.337732        | 0.000363439     | 27.91256        | 0.3524276 | 217.6368    |       |                 |  |   |  |   |  |
| L3m                                                   | 2.443181        | 170.5046        | 277.4474        |           |             |       |                 |  |   |  |   |  |
| P                                                     | 2.503255        |                 | 225.454         |           | 318.6065    |       |                 |  |   |  |   |  |
| A                                                     | 2.794117        | 0.006332428     | 12.22789        | 1.833339  | 622.4676    |       |                 |  |   |  |   |  |

*P. regina* 20.0° C.

| P. regina 20.0° C                                     |                 |                 |                 |                 |                 | Dataset        |          |           |      |            |      |                                                                          |     |     |  |  |  |
|-------------------------------------------------------|-----------------|-----------------|-----------------|-----------------|-----------------|----------------|----------|-----------|------|------------|------|--------------------------------------------------------------------------|-----|-----|--|--|--|
| log(agonist) vs. normalized response – Variable slope |                 |                 |                 |                 |                 | L1             | L2       | L3f       | L3m  | P          | A    | * starred and italicized data points were excluded from final regression |     |     |  |  |  |
|                                                       |                 |                 |                 |                 |                 | log(time)      |          |           |      |            |      |                                                                          |     |     |  |  |  |
|                                                       |                 |                 |                 |                 |                 | L1             | L2       | L3f       | L3m  | P          | A    |                                                                          |     |     |  |  |  |
| Best-fit values                                       |                 |                 |                 |                 |                 |                |          |           |      |            |      |                                                                          |     |     |  |  |  |
| LogEC50                                               | 1.385           | 1.873           | 2.089           | 2.306           | 2.389           | 2.66           | 0.60206  | 0         | 0    | 0          | 0    | 0                                                                        | 0   | 0   |  |  |  |
| HillSlope                                             | 15.93           | 37.75           | 11.92           | 12.49           | 7.19            | 7.118          | 0.910936 | 0         | 0    | 0          | 0    | 0                                                                        | 0   | 0   |  |  |  |
| EC50                                                  | 24.26           | 74.61           | 122.7           | 202.4           | 244.8           | 447.2          | 1.082187 | 0         | 0    | 0          | 0    | 0                                                                        | 0   | 0   |  |  |  |
| Std. Error                                            |                 |                 |                 |                 |                 |                |          |           |      |            |      |                                                                          |     |     |  |  |  |
| LogEC50                                               | 0.0003807       | 0.001212        | 0.009542        | 0.001248        | 0.01971         | 0.01278        | 1.304544 | 5         | 0    | 0          | 0    | 0                                                                        | 0   | 0   |  |  |  |
| HillSlope                                             | 0.07176         | 15.56           | 2.813           | 0.4724          | 2.094           | 1.313          | 1.492411 | 98.1      | 0    | 0          | 0    | 0                                                                        | 0   | 0   |  |  |  |
| 95% Confidence intervals                              |                 |                 |                 |                 |                 |                |          |           |      |            |      |                                                                          |     |     |  |  |  |
| LogEC50                                               | 1.384 to 1.386  | 1.870 to 1.875  | 2.068 to 2.110  | 2.304 to 2.309  | 2.347 to 2.430  | 2.624 to 2.677 | 1.625613 | 100       | 0    | 0          | 0    | 0                                                                        | 0   | 0   |  |  |  |
| HillSlope                                             | 15.76 to 16.11  | 3.092 to 72.41  | 5.840 to 17.99  | 11.48 to 13.50  | 2.791 to 11.59  | 4.401 to 9.834 | 1.625613 | 100       | 0    | 0          | 0    | 0                                                                        | 0   | 0   |  |  |  |
| EC50                                                  | 24.20 to 24.31  | 74.15 to 75.08  | 117.1 to 128.7  | 201.2 to 203.7  | 222.5 to 269.3  | 420.8 to 475.3 | 1.72591  | 100       | 0    | 0          | 0    | 0                                                                        | 0   | 0   |  |  |  |
| Goodness of Fit                                       |                 |                 |                 |                 |                 |                |          |           |      |            |      |                                                                          |     |     |  |  |  |
| Degrees of Freedom                                    | 6               | 10              | 13              | 15              | 18              | 23             | 1.959836 | 96.4      | 0    | 0          | 0    | 0                                                                        | 0   | 0   |  |  |  |
| R square                                              | 1               | 0.9992          | 0.9262          | 0.996           | 0.8416          | 0.9454         | 2.000161 | 100       | 0    | 0          | 0    | 0                                                                        | 0   | 0   |  |  |  |
| Absolute Sum of Squares                               | 0.01737         | 12.83           | 953.4           | 16.07           | 2313            | 1467           | 2.090772 | 68.6      | 0    | 0          | 0    | 0                                                                        | 0   | 0   |  |  |  |
| Syx                                                   | 0.0538          | 1.133           | 8.564           | 1.035           | 11.34           | 7.986          | 2.143119 | 75        | 0    | 0          | 0    | 0                                                                        | 0   | 0   |  |  |  |
| Runs test                                             |                 |                 |                 |                 |                 |                |          |           |      |            |      |                                                                          |     |     |  |  |  |
| Points above curve                                    | 3               | 2               | 1               | 1               | 2               | 3              | 2.262402 | 23.7      | 0    | 0          | 0    | 0                                                                        | 0   | 0   |  |  |  |
| Points below curve                                    | 5               | 10              | 14              | 16              | 18              | 22             | 2.324668 | 62.3      | 0    | 0          | 0    | 0                                                                        | 0   | 0   |  |  |  |
| Number of runs                                        | 4               | 4               | 3               | 3               | 4               | 4              | 2.426511 | 66.4      | 0    | 0          | 0    | 0                                                                        | 0   | 0   |  |  |  |
| P value (runs test)                                   | 0.4286          | 0.4545          | 1               | 1               | 0.2842          | 0.0474         | 2.426511 | 57.7      | 0    | 0          | 0    | 0                                                                        | 0   | 0   |  |  |  |
| Deviation from Model                                  | Not Significant | Significant    | 2.562293 | 96.4      | 0    | 0          | 0    | 0                                                                        | 0   | 0   |  |  |  |
| Number of points Analyzed                             | 8               | 12              | 15              | 17              | 20              | 25             | 2.638489 | 69.4      | 96.4 | 69.4       | 63.3 | 66.5                                                                     | 100 | 100 |  |  |  |
|                                                       |                 |                 |                 |                 |                 |                |          |           |      |            |      |                                                                          |     |     |  |  |  |
| LogEC50                                               |                 |                 |                 |                 |                 | Value          |          | HillSlope |      | EC50       |      |                                                                          |     |     |  |  |  |
| Value                                                 |                 |                 |                 |                 |                 | SE             |          | Value     |      | SE         |      |                                                                          |     |     |  |  |  |
| L1                                                    | 1.384832        |                 |                 |                 |                 | 0.000380717    |          | 15.93346  |      | 0.07176174 |      | 24.2567                                                                  |     |     |  |  |  |
| L2                                                    | 1.872798        |                 |                 |                 |                 | 0.001212337    |          | 37.75079  |      | 15.55602   |      | 74.61017                                                                 |     |     |  |  |  |
| L3f                                                   | 2.088984        |                 |                 |                 |                 | 0.00954158     |          | 11.91675  |      | 2.813202   |      | 122.7394                                                                 |     |     |  |  |  |
| L3m                                                   | 2.306236        |                 |                 |                 |                 | 0.007248195    |          | 12.49111  |      | 0.4723944  |      | 202.4119                                                                 |     |     |  |  |  |
| P                                                     | 2.388817        |                 |                 |                 |                 | 0.01970522     |          | 7.190236  |      | 2.093775   |      | 244.8032                                                                 |     |     |  |  |  |
| A                                                     | 2.650498        |                 |                 |                 |                 | 0.01277997     |          | 7.117673  |      | 1.312933   |      | 447.1963                                                                 |     |     |  |  |  |

*P. regina* 22.5° C.

| <i>P. regina</i> 22.5° C                               |                 |                 |                 | Dataset         |                 |                |                                                                          |      |      |      |      |      |      |
|--------------------------------------------------------|-----------------|-----------------|-----------------|-----------------|-----------------|----------------|--------------------------------------------------------------------------|------|------|------|------|------|------|
| log(jagorist) vs. normalized response – Variable slope | L1              | L2              | L3f             | L3m             | P               | A              | * stanned and italicized data points were excluded from final regression |      |      |      |      |      |      |
|                                                        | Best-fit values |                 |                 |                 |                 |                | log(lims)                                                                | L1   | L2   | L3f  | L3m  | P    | A    |
| LogEC50                                                | 1.19            | 1.697           | 1.902           | 2.127           | 2.251           | 2.552          | 0.477121                                                                 | 0    | 0    | 0    | 0    | 0    | 0    |
| HLISlope                                               | 94.11           | 31.42           | 9.846           | 33.7            | 16.2            | 18.5           | 0.781456                                                                 | 0    | 0    | 0    | 0    | 0    | 0    |
| EC50                                                   | 15.5            | 49.81           | 91.63           | 134             | 178.3           | 356.1          | 0.98046                                                                  | 0    | 0    | 0    | 0    | 0    | 0    |
| Std. Error                                             |                 |                 |                 |                 |                 |                | 1.082486                                                                 | 0    | 0    | 0    | 0    | 0    | 0    |
| LogEC50                                                |                 | 0.001553        | 0.006843        | 0.002154        | 0.00123         | 0.0005221      | 1.18599                                                                  | 27.8 | 0    | 0    | 0    | 0    | 0    |
| HLISlope                                               |                 | 4.133           | 1.325           | 2.26            | 0.6253          | 0.4255         | 1.384712                                                                 | 100  | 0    | 0    | 0    | 0    | 0    |
| 95% Confidence Intervals                               |                 |                 |                 |                 |                 |                | 1.516039                                                                 | 100  | 0    | 0    | 0    | 0    | 0    |
| LogEC50                                                |                 | 1.694 to 1.701  | 1.948 to 1.976  | 2.123 to 2.132  | 2.249 to 2.254  | 2.550 to 2.553 | 1.624712                                                                 |      | 0    | 0    | 0    | 0    | 0    |
| HLISlope                                               |                 | 22.07 to 40.77  | 6.985 to 12.71  | 28.85 to 38.54  | 14.88 to 17.50  | 17.62 to 19.38 | 1.708987                                                                 |      | 69.9 | 0    | 0    | 0    | 0    |
| EC50                                                   |                 | 49.41 to 50.22  | 88.66 to 94.71  | 132.6 to 135.5  | 177.2 to 179.3  | 355.2 to 357.0 | 1.779717                                                                 |      | 98.5 | 0    | 0    | 0    | 0    |
| Goodness of Fit                                        |                 |                 |                 |                 |                 |                | 1.863995                                                                 |      | 100  | 0    | 0    | 0    | 0    |
| Degrees of Freedom                                     |                 | 9               | 13              | 14              | 19              | 24             | 1.935108                                                                 |      |      | 45.3 | 0    | 0    | 0    |
| R square                                               |                 | 0.9999          | 0.9797          | 0.9972          | 0.9988          | 0.9998         | 1.995507                                                                 |      |      | 58.9 | 0    | 0    | 0    |
| Absolute Sum of Squares                                |                 | 1.813           | 350.8           | 23.72           | 32.71           | 7.33           | 2.04946                                                                  |      |      | 94.9 | 5.1  | 0    | 0    |
| Sy. x                                                  |                 | 0.4489          | 5.195           | 1.302           | 1.312           | 0.6526         | 2.097416                                                                 |      |      | 91.3 | 8.8  | 0    | 0    |
| Runs test                                              |                 |                 |                 |                 |                 |                | 2.167797                                                                 |      |      |      | 96.1 | 0    | 0    |
| Points above curve                                     |                 | 2               | 2               | 2               | 3               | 3              | 2.227972                                                                 |      |      |      |      | 31.9 | 0    |
| Points below curve                                     |                 | 9               | 13              | 14              | 18              | 23             | 2.281355                                                                 |      |      |      |      | 73.4 | 0    |
| Number of runs                                         |                 | 4               | 5               | 4               | 6               | 4              | 2.328677                                                                 |      |      |      |      | 96.9 | 0    |
| P value (runs test)                                    |                 | 0.4909          | 1               | 0.35            | 0.4887          | 0.0438         | 2.371245                                                                 |      |      |      |      | 98.6 | 0    |
| Deviation from Model                                   |                 | Not Significant | Not Significant | Not Significant | Not Significant | Significant    | 2.463893                                                                 |      |      |      |      | 100  | 0    |
| Number of points                                       |                 |                 |                 |                 |                 |                | 2.540329                                                                 |      |      |      |      |      | 38.7 |
| Analyzed                                               |                 |                 |                 |                 |                 |                | 2.604226                                                                 |      |      |      |      |      | 89.9 |
|                                                        | 7               | 11              | 15              | 16              | 21              | 26             | 2.661734                                                                 |      |      |      |      |      | 97.9 |
|                                                        |                 |                 |                 |                 |                 |                | 2.718502                                                                 |      |      |      |      |      | 100  |
|                                                        |                 |                 |                 |                 |                 |                | 2.718502                                                                 |      |      |      |      |      | 100  |
| L1                                                     | Value           | SE              | Value           | SE              | Value           | SE             |                                                                          |      |      |      |      |      |      |
| L2                                                     | 1.190394        |                 | 94.11095        |                 | 15.50223        |                |                                                                          |      |      |      |      |      |      |
| L2                                                     | 1.697359        | 0.001552868     | 31.41866        | 4.133388        | 49.81488        |                |                                                                          |      |      |      |      |      |      |
| L3f                                                    | 1.962052        | 0.006642889     | 9.846122        | 1.324794        | 91.633          |                |                                                                          |      |      |      |      |      |      |
| L3m                                                    | 2.127175        | 0.002153887     | 33.69727        | 2.259687        | 134.0216        |                |                                                                          |      |      |      |      |      |      |
| P                                                      | 2.251125        | 0.001229658     | 16.19546        | 0.6253129       | 178.289         |                |                                                                          |      |      |      |      |      |      |
| A                                                      | 2.551577        | 0.000522125     | 18.49873        | 0.4254735       | 356.104         |                |                                                                          |      |      |      |      |      |      |



*P. regina* 25.0° C.

| <i>P. regina</i> 25.0° C                                                 |             |                 |                 |                 |                 |       |           |      |     |
|--------------------------------------------------------------------------|-------------|-----------------|-----------------|-----------------|-----------------|-------|-----------|------|-----|
| log(agonist) vs. normalized response – Variable slope                    | L1          |                 | L2              |                 | L3f             |       | L3m       |      | A   |
|                                                                          | Interrupted | Best-fit values |                 |                 |                 |       |           |      |     |
| LogEC50                                                                  | 1.181       | 1.637           | 1.853           | 2.091           | 2.19            | 2.452 | 0.4831093 | 0    | 0   |
| HillSlope                                                                | 108.3       | 27.57           | 13.01           | 19.76           | 32.77           | 148.7 | 0.7805573 | 0    | 0   |
| EC50                                                                     | 15.15       | 43.33           | 71.3            | 123.2           | 154.8           | 283.4 | 0.9844444 | 0    | 0   |
| Std. Error                                                               |             |                 |                 |                 |                 |       | 1.081137  | 0    | 0   |
| LogEC50                                                                  |             | 0.0001632       | 0.004192        | 0.0005511       | 0.0004895       |       | 1.179695  | 44.7 | 0   |
| HillSlope                                                                |             | 0.83            | 1.47            | 0.415           | 0.186           |       | 1.346353  | 100  | 0   |
| 95% Confidence Intervals                                                 |             |                 |                 |                 |                 |       |           |      |     |
| LogEC50                                                                  |             | 1.636 to 1.637  | 1.844 to 1.862  | 2.089 to 2.092  | 2.190 to 2.190  |       | 1.407185  | 100  | 0   |
| HillSlope                                                                |             | 25.69 to 29.45  | 9.837 to 16.19  | 18.87 to 20.64  | 32.53 to 33.02  |       | 1.557858  | 0    | 0   |
| EC50                                                                     |             | 43.29 to 43.37  | 69.83 to 72.80  | 122.9 to 123.6  | 154.7 to 154.8  |       | 1.634561  | 46.5 | 0   |
| Goodness of Fit                                                          |             |                 |                 |                 |                 |       | 1.696993  | 97.9 | 0   |
| Degrees of Freedom                                                       |             | 9               | 13              | 15              | 19              |       | 1.778332  | 100  | 0   |
| R square                                                                 |             | 1               | 0.9906          | 0.9994          | 1               |       | 1.845641  | 51.6 | 0   |
| Absolute Sum of Squares                                                  |             | 0.5233          | 187             | 5.058           | 0.03495         |       | 1.904558  | 76.4 | 0   |
| Sy.x                                                                     |             | 0.2411          | 3.793           | 0.5807          | 0.04289         |       | 1.954685  | 95   | 0   |
| Runs test                                                                |             |                 |                 |                 |                 |       |           |      |     |
| Points above curve                                                       |             | 2               | 1               | 2               | 3               |       | 2.000398  | 96.3 | 0   |
| Points below curve                                                       |             | 9               | 14              | 15              | 18              |       | 2.072311  | 29.9 | 0   |
| Number of runs                                                           |             | 4               | 3               | 4               | 4               |       | 2.13712   | 88   | 1.3 |
| P value (runs test)                                                      |             | 0.4909          | 1               | 0.3309          | 0.0669          |       | 2.177897  | 29.1 | 0   |
| Deviation from Model                                                     |             | Not Significant | Not Significant | Not Significant | Not Significant |       | 2.238631  | 97.5 | 0   |
| Number of points                                                         |             |                 |                 |                 |                 |       | 2.281166  | 100  | 0   |
| Analyzed                                                                 |             |                 |                 |                 |                 |       | 2.376851  | 100  | 0   |
|                                                                          |             |                 |                 |                 |                 |       | 2.454845  | 69.6 | 0   |
|                                                                          |             |                 |                 |                 |                 |       | 2.521138  | 100  | 100 |
|                                                                          |             |                 |                 |                 |                 |       | 2.579212  | 100  | 100 |
| Dataset                                                                  |             |                 |                 |                 |                 |       |           |      |     |
| * starred and italicized data points were excluded from final regression |             |                 |                 |                 |                 |       |           |      |     |
| L1                                                                       | Value       | SE              | HillSlope       | Value           | SE              |       |           |      |     |
| L2                                                                       | 1.180549    | 0.000163249     | 108.2923        | 15.15475        |                 |       |           |      |     |
| L3f                                                                      | 1.636794    | 0.000163249     | 27.56866        | 43.33057        |                 |       |           |      |     |
| L3m                                                                      | 1.853078    | 0.004192438     | 13.01129        | 71.29813        |                 |       |           |      |     |
| P                                                                        | 2.090673    | 0.000551138     | 19.75802        | 123.2176        |                 |       |           |      |     |
| A                                                                        | 2.189708    | 4.88547E-05     | 32.77439        | 154.7777        |                 |       |           |      |     |
|                                                                          | 2.452426    |                 | 148.7319        | 283.4172        |                 |       |           |      |     |

*P. regina* 27.5° C.

[illegible]

*P. regina* 30.0° C.

| <i>P. regina</i> 30.0° C                               |             |                 |                 | Dataset         |                 |                 |          |          |         |   |             |   |   |
|--------------------------------------------------------|-------------|-----------------|-----------------|-----------------|-----------------|-----------------|----------|----------|---------|---|-------------|---|---|
| log(aggonist) vs. normalized response – Variable slope | L1          |                 | L2              |                 | L3f             |                 | L3m      |          | P       |   | A           |   |   |
|                                                        | Interrupted | Best-fit values |                 |                 |                 |                 |          |          |         |   | Interrupted |   |   |
| LogEC50                                                |             | 1.012           | 1.437           | 1.669           | 1.878           | 2.028           | 2.338    | 0.319426 | 0       | 0 | 0           | 0 | 0 |
| HillSlope                                              |             | 95.46           | 19.72           | 36.71           | 19.81           | 40.66           | 148.9    | 0.060113 | 0       | 0 | 0           | 0 | 0 |
| EC50                                                   |             | 10.27           | 27.34           | 46.62           | 75.96           | 106.7           | 217.8    | 0.783248 | 0       | 0 | 0           | 0 | 0 |
| Std. Error                                             |             |                 |                 |                 |                 |                 |          | 0.907367 | 0       | 0 | 0           | 0 | 0 |
| LogEC50                                                |             |                 | 0.004002        | 0.005726        | 0.0009341       | 0.0005932       |          | 1.003425 | 13.8    | 0 | 0           | 0 | 0 |
| HillSlope                                              |             |                 | 2.694           | 9.265           | 0.7456          | 4.012           |          | 1.209403 | 100     | 0 | 0           | 0 | 0 |
| 95% Confidence Intervals                               |             |                 |                 |                 |                 |                 |          | 1.34431  | 100     | 0 | 0           | 0 | 0 |
| LogEC50                                                |             |                 | 1.428 to 1.446  | 1.656 to 1.881  | 1.876 to 1.880  | 2.027 to 2.029  |          | 1.46439  | 78.1    | 0 | 0           | 0 | 0 |
| HillSlope                                              |             |                 | 13.50 to 25.93  | 16.32 to 57.10  | 18.21 to 21.40  | 32.26 to 49.05  |          | 1.53073  | 95.7    | 0 | 0           | 0 | 0 |
| EC50                                                   |             |                 | 26.77 to 27.93  | 45.29 to 48.00  | 75.21 to 75.91  | 106.4 to 107.0  |          | 1.604991 | 100     | 0 | 0           | 0 | 0 |
| Goodness of Fit                                        |             |                 |                 |                 |                 |                 |          | 1.691155 |         |   |             |   |   |
| Degrees of Freedom                                     |             |                 | 8               | 11              | 14              | 19              |          | 1.748898 |         |   |             |   |   |
| R square                                               |             |                 | 0.9993          | 0.9996          | 0.9998          | 0.9999          |          | 1.807027 |         |   |             |   |   |
| Absolute Sum of Squares                                |             |                 | 11.61           | 7.982           | 19.21           | 2.775           |          | 1.85786  |         |   |             |   |   |
| Sy.x                                                   |             |                 | 1.205           | 0.8519          | 1.171           | 0.3821          |          | 1.903633 |         |   |             |   |   |
| Runs test                                              |             |                 |                 |                 |                 |                 |          | 1.973128 |         |   |             |   |   |
| Points above curve                                     |             |                 | 2               | 2               | 2               | 3               |          | 2.033893 |         |   |             |   |   |
| Points below curve                                     |             |                 | 8               | 11              | 14              | 18              |          | 2.066389 |         |   |             |   |   |
| Number of runs                                         |             |                 | 4               | 4               | 4               | 4               |          | 2.133792 |         |   |             |   |   |
| P value (runs test)                                    |             |                 | 0.5333          | 0.4231          | 0.35            | 0.0669          |          | 2.173514 |         |   |             |   |   |
| Deviation from Model                                   |             |                 | Not Significant | Not Significant | Not Significant | Not Significant |          | 2.267406 |         |   |             |   |   |
| Number of points                                       |             |                 |                 |                 |                 |                 |          | 2.34262  |         |   |             |   |   |
| Analyzed                                               |             |                 | 7               | 10              | 13              | 16              | 21       | 25       | 2.40654 |   |             |   |   |
|                                                        |             |                 |                 |                 |                 |                 |          | 2.40654  |         |   |             |   |   |
|                                                        |             |                 |                 |                 |                 |                 |          | 2.40654  |         |   |             |   |   |
| L1                                                     |             | Value           | SE              |                 | HillSlope       | SE              | Value    | SE       |         |   |             |   |   |
| L2                                                     |             | 1.011759        | 95.46452        |                 | 19.71729        | 2.694262        | 10.27447 |          |         |   |             |   |   |
| L3f                                                    |             | 1.436822        | 0.004001522     |                 | 36.71099        | 9.265081        | 27.34145 |          |         |   |             |   |   |
| L3m                                                    |             | 1.66861         | 0.00572557      |                 | 19.80556        | 0.7455657       | 46.62409 |          |         |   |             |   |   |
| P                                                      |             | 1.878284        | 0.000934142     |                 | 40.65754        | 4.011531        | 75.58583 |          |         |   |             |   |   |
| A                                                      |             | 2.02813         | 0.000593187     |                 | 148.8649        |                 | 106.6916 |          |         |   |             |   |   |
|                                                        |             | 2.337973        |                 |                 |                 |                 | 217.7576 |          |         |   |             |   |   |

*P. regina* 32.5° C.

| <i>P. regina</i> 32.5° C                              |                 |             |                 |                 |                 |                                                                          |          |       |     |
|-------------------------------------------------------|-----------------|-------------|-----------------|-----------------|-----------------|--------------------------------------------------------------------------|----------|-------|-----|
| log(agonist) vs. normalized response – Variable slope |                 |             |                 |                 | Dataset         |                                                                          |          |       |     |
| L1                                                    | L2              | L3f         | L3m             | P               | A               | * starred and italicized data points were excluded from final regression |          |       |     |
| Interrupted                                           |                 |             |                 |                 |                 | L1                                                                       | L2       | L3f   | L3m |
| Best-fit values                                       |                 |             |                 |                 |                 | log(like)                                                                |          |       |     |
| LogEC50                                               | 1.139           | 1.4         | 1.619           | 1.978           | 2.252           | 2.543                                                                    | 0        | 0     | 0   |
| HillSlope                                             | 4.308           | 110.3       | 14.19           | 10.99           | 6.571           | 11.48                                                                    | 5.8      | 0     | 0   |
| EC50                                                  | 13.77           | 25.11       | 41.59           | 95.09           | 178.6           | 349.1                                                                    | 43.3     | 0     | 0   |
| Std. Error                                            |                 |             |                 |                 |                 |                                                                          |          |       |     |
| LogEC50                                               | 0.009731        |             | 0.003305        | 0.01157         | 0.008096        | 0.007449                                                                 | 1.182795 | 0     | 0   |
| HillSlope                                             | 0.4771          |             | 1.079           | 3.094           | 0.7149          | 2.115                                                                    | 1.985932 | 81.3  | 0   |
| 95% Confidence Intervals                              |                 |             |                 |                 |                 |                                                                          |          |       |     |
| LogEC50                                               | 1.108 to 1.170  |             | 1.611 to 1.627  | 1.953 to 2.003  | 2.235 to 2.269  | 2.528 to 2.558                                                           | 1.402046 | 63.7  | 0   |
| HillSlope                                             | 2.789 to 5.826  |             | 11.71 to 16.68  | 4.350 to 17.62  | 5.084 to 8.058  | 7.119 to 15.85                                                           | 1.494039 | 100   | 0   |
| EC50                                                  | 12.82 to 14.79  |             | 40.86 to 42.32  | 89.81 to 100.7  | 171.8 to 185.6  | 337.0 to 361.7                                                           | 1.592732 | 90.0* | 0   |
| Goodness of Fit                                       |                 |             |                 |                 |                 |                                                                          |          |       |     |
| Degrees of Freedom                                    | 3               |             | 8               | 14              | 21              | 24                                                                       | 1.706633 | 77.2  | 0   |
| R square                                              | 0.9917          |             | 0.9996          | 0.8745          | 0.9719          | 0.9137                                                                   | 1.655178 | 93.1  | 0   |
| Absolute Sum of Squares                               | 39.59           |             | 6.807           | 1458            | 575.4           | 996.9                                                                    | 1.769356 | 100   | 0   |
| Sy.x                                                  | 3.633           |             | 0.9224          | 10.2            | 5.235           | 6.445                                                                    | 1.840603 | 0     | 0   |
| Runs test                                             |                 |             |                 |                 |                 |                                                                          |          |       |     |
| Points above curve                                    | 2               |             | 2               | 2               | 3               | 2                                                                        | 1.892813 | 0     | 0   |
| Points below curve                                    | 3               |             | 8               | 14              | 20              | 24                                                                       | 2.092165 | 0     | 0   |
| Number of runs                                        | 4               |             | 4               | 4               | 4               | 4                                                                        | 2.158928 | 11.1  | 0   |
| P value (runs test)                                   | 0.9             |             | 0.5333          | 0.35            | 0.0559          | 0.2215                                                                   | 2.20438  | 36.2  | 0   |
| Deviation from Model                                  | Not Significant |             | Not Significant | Not Significant | Not Significant | Not Significant                                                          | 2.245831 | 63.1  | 0   |
| Number of points                                      |                 |             |                 |                 |                 |                                                                          |          |       |     |
| Analyzed                                              | 5               | 7           | 10              | 16              | 23              | 28                                                                       | 2.328677 | 66    | 0   |
| LogEC50                                               |                 |             |                 |                 |                 |                                                                          |          |       |     |
| Value                                                 | 1.139           | SE          | 0.009731171     |                 | Value           | SE                                                                       | 2.398099 | 82.8  | 0   |
| L1                                                    | 1.399831        |             | 4.307749        | 0.4771413       | 13.77211        |                                                                          | 2.439484 | 96.7  | 0   |
| L2                                                    | 1.618942        | 0.00305214  | 110.2617        | 0.4771413       | 25.10909        |                                                                          | 2.485035 | 41.7  | 0   |
| L3f                                                   | 1.978156        | 0.01156718  | 14.1936         | 1.079273        | 41.58552        |                                                                          | 2.542825 | 30.9  | 0   |
| L3m                                                   | 2.251843        | 0.00905888  | 10.98604        | 3.053692        | 95.09459        |                                                                          | 2.61066  | 100   | 0   |
| P                                                     | 2.542994        | 0.007448316 | 6.571046        | 0.7148767       | 178.5943        |                                                                          |          |       |     |
| A                                                     |                 |             | 11.48417        | 2.114877        | 349.1358        |                                                                          |          |       |     |
